# Supplementary material
Source: PubMed Central journal article supplement (PMC3508166)
Supplement: NIHMS399851-supplement-1_si_001.pdf [file NIHMS399851-supplement-1_si_001.pdf]

# Supporting Information For

## Expedient Synthesis of Norbenzomorphan Library via Multicomponent Assembly Process Coupled with Ring- Closing Reactions

*James J. Sahn and Stephen F. Martin\**

Department of Chemistry and Biochemistry, The Texas Institute for Drug and Diagnostic Development,  
The University of Texas at Austin, Austin, Texas 78712, USA.

[sfmartin@mail.utexas.edu](mailto:sfmartin@mail.utexas.edu)

### **Table of Contents:**

|                                                                      |         |
|----------------------------------------------------------------------|---------|
| General Experimental Methods                                         | S2      |
| Representative Experimental Procedures and Characterization          | S3-S10  |
| Characterization data                                                | S10-S15 |
| Tabulated Lipinski Parameters                                        | S16     |
| <sup>1</sup> H NMR and <sup>13</sup> C NMR spectra and chromatograms | S17-76  |
| References                                                           | S77     |

**General.** Tetrahydrofuran was dried by filtration through two columns of activated, neutral alumina according to the procedure described by Grubbs.<sup>i</sup> Acetonitrile (MeCN) was dried by filtration through two columns of activated molecular sieves, and toluene was dried by filtration through one column of activated, neutral alumina followed by one column of Q5 reactant. These solvents were determined to have less than 50 ppm H<sub>2</sub>O by Karl Fischer coulometric moisture analysis. Methylene chloride (CH<sub>2</sub>Cl<sub>2</sub>), triethylamine (Et<sub>3</sub>N) and diisopropylethylamine (*i*-Pr<sub>2</sub>NEt) were distilled from calcium hydride immediately prior to use. Where required, solvents were degassed by sparging with argon prior to use. All reagents were reagent grade and used without purification unless otherwise noted, and air or moisture sensitive reagents were weighed in a glove box. All reactions involving air or moisture sensitive reagents or intermediates were performed under an inert atmosphere of nitrogen or argon in glassware that was flame or oven dried. Reaction temperatures refer to the temperature of the cooling/heating bath. Volatile solvents were removed under reduced pressure using a Büchi rotary evaporator at 25–30 °C (bath temperature). Thin layer chromatography was run on pre-coated plates of silica gel with a 0.25 mm thickness containing 60F-254 indicator (EMD Millipore). Chromatography was performed using forced flow (flash chromatography) and the indicated solvent system on 230-400 mesh silica gel (Silicycle flash F60) according to the method of Still,<sup>ii</sup> unless otherwise noted. Radial Preparative Liquid Chromatography (radial plc) was performed on a Chromatotron<sup>®</sup> using glass plates coated with Merck, TLC grade 7749 silica gel with gypsum binder and fluorescent indicator.

Infrared (IR) spectra were obtained either neat on sodium chloride or as solutions in the solvent indicated and reported as wavenumbers (cm<sup>-1</sup>). Proton nuclear magnetic resonance (<sup>1</sup>H NMR) and carbon nuclear magnetic resonance (<sup>13</sup>C NMR) spectra were obtained at the indicated field as solutions in CDCl<sub>3</sub> unless otherwise indicated. Chemical shifts are referenced to the deuterated solvent (*e.g.*, for CDCl<sub>3</sub>, δ = 7.26 ppm and 77.0 ppm for <sup>1</sup>H and <sup>13</sup>C NMR, respectively) and are reported in parts per million (ppm, δ) relative to tetramethylsilane (TMS, δ = 0.00 ppm). Coupling constants (*J*) are reported in Hz and the splitting abbreviations used are: s, singlet; d, doublet; t, triplet; q, quartet; m, multiplet; comp, overlapping multiplets of magnetically nonequivalent protons; br, broad; app, apparent. Purity was determined using an LCMS system comprised of an Agilent 1200 Series HPLC and an Agilent 6130 single quadrupole mass spectrometer. Samples were injected onto a Phenomenex Gemini C18 column (5 micron, 2.1 x 50 mm) and eluted at 0.7 ml/min using a gradient of 10-90% acetonitrile, 0.1% formic acid (11 minute linear ramp). Positive mode electrospray ionization was used to verify the identity of the major component, and the purity was assessed via peak integration (AUC) of the UV chromatogram recorded at 214 nm.

**Representative procedure for Suzuki cross-coupling reactions with aryl chlorides 18{1-3}.**

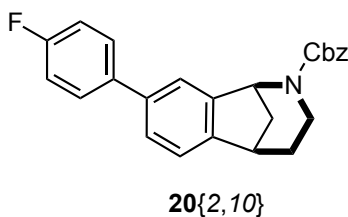

**Benzyl 8-(4-fluorophenyl)-4,5-dihydro-1H-1,5-methanobenzo[c]azepine-2(3H)-carboxylate (20{2,10}).** A solution of carbamate **18{2}** (92 mg, 0.28 mmol), *p*-fluorophenylboronic acid (**19{10}**) (79 mg, 0.56 mmol), Cs<sub>2</sub>CO<sub>3</sub> (183 mg, 0.56 mmol), palladium(bis)(*t*-butyl)<sub>3</sub> phosphine (7.2 mg, 0.014 mmol) in degassed 1,4-dioxane (0.85 mL) was stirred for 21 h at 100 °C. The reaction was cooled to room temperature and poured into water (2 mL). The mixture was extracted with CH<sub>2</sub>Cl<sub>2</sub> (3 x 15 mL), and the combined organic layers were dried (MgSO<sub>4</sub>) and concentrated under reduced pressure to provide the crude product, which was purified via radial plc (SiO<sub>2</sub>) eluting with hexanes/EtOAc (100:0; 95:5; 90:10) to give 101 mg (94%) of **20{2,10}** as a colorless oil: <sup>1</sup>H NMR (400 MHz) δ 7.54-7.29 (comp, 10 H), 7.12 (t, *J* = 8.8 Hz, 2 H), 5.64-5.56 and 5.50-5.45 (rotomers, m, 1 H), 5.29-5.10 (m, 2 H), 3.95-3.79 (m, 1 H), 3.33 (d, *J* = 2.0 Hz, 1 H), 2.59-2.45 (m, 1 H), 2.27 (br s, 1 H), 2.03 (br s, 1 H), 1.93 (d, *J* = 11.2, 1 H), 1.71-1.58 (m, 1 H); <sup>13</sup>C NMR (75 MHz) (rotomers) δ 162.7 (d, *J*<sub>C-F</sub> = 245 Hz), 155.3, 145.7, 142.2, 139.9, 137.5, 137.1, 129.0, 128.8, 128.7, 128.2, 127.5, 123.3, 122.8, 115.9 (d, *J*<sub>C-F</sub> = 21.3 Hz), 67.3, 57.9, 57.6, 44.0, 39.7, 38.9, 30.5; IR (thin film, neat) 2951, 1695, 1421, 1234, 1101 cm<sup>-1</sup>; mass spectrum (ESI) *m/z* 388.1709 [C<sub>25</sub>H<sub>23</sub>FNO<sub>2</sub> (M+1) requires 388.1713]; LCMS purity 99%.

**Representative procedure for Buchwald-Hartwig reactions with aryl chlorides 18{1-3}.**

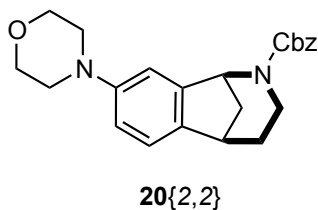

**Benzyl 8-morpholino-4,5-dihydro-1H-1,5-methanobenzo[c]azepine-2(3H)-carboxylate (20{2,2}).** A solution of carbamate **18{2}** (130 mg, 0.396 mmol), NaO-*t*-Bu (53 mg, 0.55 mmol) and morpholine (45 mg, 0.515 mmol) in degassed toluene (0.75 mL) was stirred for 5 min. A freshly

prepared toluene solution of Pd(OAc)<sub>2</sub> and di-*tert*-butylphosphine biphenyl (JohnPhos<sup>®</sup>) (1:1, 0.1 mL, 0.08 M), that had been stirred for 20 min, was added to the reaction mixture via syringe. After heating at 100 °C for 4.75 h, the reaction was cooled to room temperature, poured into water (3 mL) and extracted with CH<sub>2</sub>Cl<sub>2</sub> (3 x 15 mL). The combined organic extracts were dried (K<sub>2</sub>CO<sub>3</sub>), filtered and concentrated under reduced pressure to provide the crude product, which was purified via radial plc (SiO<sub>2</sub>), eluting with hexanes/EtOAc (100:0; 90:10; 80:20) to give 146 mg (97%) of **20**{2,2} as a pale yellow oil: <sup>1</sup>H NMR (400 MHz) δ 7.43-7.27 (comp, 5 H), 7.13 (d, *J* = 8.2 Hz, 1 H), 6.96 and 6.78 (rotomers, s, 1 H), 6.80 (dd, *J* = 8.2, 2.4 Hz, 1 H), 5.47 and 5.35 (rotomers, br s, 1 H), 5.27-5.07 (m, 2 H), 3.85 (t, *J* = 4.8 Hz, 4 H), 3.84-3.65 (m, 1 H), 3.21 (br s, 1 H), 3.11 (app br d, *J* = 19.2 Hz, 4 H), 2.53-2.38 (m, 1 H), 2.30-2.12 (m, 1 H), 2.05-1.90 (m, 1 H), 1.85 (d, *J* = 10.4 Hz, 1 H), 1.64-1.50 (m, 1 H); <sup>13</sup>C NMR (75 MHz) (rotomers) δ 155.3, 155.1, 151.4, 142.6, 142.3, 138.1, 137.4, 137.2, 128.7, 128.2, 128.1, 123.4, 116.1, 115.8, 112.2, 112.0, 67.2, 67.1, 58.3, 58.0, 53.8, 50.2, 44.0, 39.2, 38.9, 30.7; IR (thin film, neat) 2958, 2851, 1695, 1615, 1495, 1421, 1234, 1121 cm<sup>-1</sup>; mass spectrum (ESI) *m/z* 379.2016 [C<sub>23</sub>H<sub>27</sub>N<sub>2</sub>O<sub>3</sub> (M+1) requires 379.2022]; LCMS purity 100%.

**Representative procedure for TMSI promoted benzylation of carbamates **18** and **20**.**

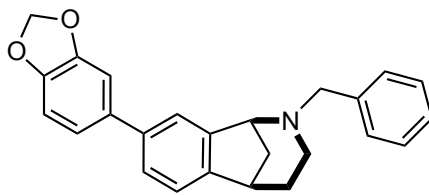

**21**{2,11}

**8-(Benzo[*d*][1,3]dioxol-5-yl)-2-benzyl-2,3,4,5-tetrahydro-1*H*-1,5-methanobenzo[*c*]azepine (21**{2,11}). *Reaction carried out in the dark.* A solution of carbamate **20**{2,11} (99 mg, 0.24 mmol) and TMSI (95 mg, 0.48 mmol) in CH<sub>2</sub>Cl<sub>2</sub> (4.0 mL) was stirred for 3 h at 0 °C. MeOH (3 mL) and a saturated aqueous NaHCO<sub>3</sub> solution (3 mL) were added, and the mixture was stirred for 10 min. The MeOH was removed under reduced pressure, and the aqueous mixture was extracted with CH<sub>2</sub>Cl<sub>2</sub> (3 x 10 mL). The combined organic extracts were dried (K<sub>2</sub>CO<sub>3</sub>), filtered and concentrated under reduced pressure, and the residue was purified via radial plc (SiO<sub>2</sub>), eluting with hexanes/EtOAc (100:0; 95:5; 90:10) to give 70 mg (79 %) of benzylamine **21**{2,11} as a white solid: mp 142-143 °C; <sup>1</sup>H NMR (300 MHz) δ 7.46-7.27 (comp, 8 H), 7.14 (comp, 2 H), 6.95 (d, *J* = 7.5 Hz, 1 H), 6.05 (s, 2 H), 3.97 (d, *J* =

4.8 Hz, 1 H), 3.53 (d,  $J = 13.3$  Hz, 1 H), 3.35 (d,  $J = 13.3$  Hz, 1 H), 3.24-3.16 (m, 1 H), 2.63 (dd,  $J = 10.8, 5.7$  Hz, 1 H), 2.30-2.20 (m, 1 H), 2.12-1.97 (comp, 2 H), 1.62-1.53 (comp, 2 H);  $^{13}\text{C}$  NMR (75 MHz)  $\delta$  148.4, 147.1, 145.8, 140.0, 139.4, 136.4, 129.4, 128.6, 127.1, 126.6, 122.9, 120.9, 108.9, 108.1, 101.4, 63.0, 60.6, 47.3, 45.0, 39.9, 30.6; IR (thin film, neat) 3031, 2935, 2811, 1506, 1465, 1224, 1046  $\text{cm}^{-1}$ ; mass spectrum (ESI)  $m/z$  370.1804 [ $\text{C}_{25}\text{H}_{24}\text{NO}_2$  (M+1) requires 370.1802]; LCMS purity 100%.

**Representative procedure for Cbz deprotection of C-aryl norbenzomorphans<sup>iii</sup> **20**{2,6} – **20**{3,11}**.

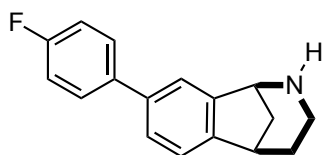

**23**{2,10}

**8-(4-Fluorophenyl)-2,3,4,5-tetrahydro-1H-1,5-methanobenzo[c]azepine (**23**{2,10})**. *Reaction carried out in the dark.* A solution of carbamate **20**{2,10} (244 mg, 0.63 mmol) and TMSI (250 mg, 1.25 mmol) in  $\text{CH}_2\text{Cl}_2$  (7 mL) was stirred for 3 h at 0 °C. Methanolic HCl (2.5 mL, 1.8 M) was added and after stirring for 5 min, the reaction was concentrated under reduced pressure. Diethyl ether (5 mL) was added and the solution was stirred for 5 min. The solids were allowed to settle and the supernatant was removed via syringe. Aqueous NaOH (5 mL, 2.7 M) was added to the remaining solid and the mixture was stirred for 5 min. After the addition of  $\text{CH}_2\text{Cl}_2$  (20 mL) and 5 more min of stirring, the layers were separated, and the aqueous layer was extracted with  $\text{CH}_2\text{Cl}_2$  (3 x 10 mL). The combined organic layers were dried ( $\text{K}_2\text{CO}_3$ ), filtered, and concentrated under reduced pressure and the residue was purified via radial plc ( $\text{SiO}_2$ ), eluting with hexanes/EtOAc/ $\text{Et}_3\text{N}$ /MeOH (100:0:0:0; 51:49:2:0; 0:98:2:0; 0:88:2:10) to give 141 mg (87%) of **23**{2,10} as a light brown semi-solid:  $^1\text{H}$  NMR (400 MHz)  $\delta$  7.55-7.52 (comp, 2 H), 7.42-7.39 (comp, 2 H), 7.24 (s, 1 H), 7.10 (t,  $J = 9.2$  Hz, 2 H), 4.27 (d,  $J = 4.0$  Hz, 1 H), 3.21 (s, 1 H), 2.73 (dd,  $J = 12.4, 6.0$  Hz, 1 H), 2.35 (td,  $J = 12.4, 4.8$  Hz, 1 H), 2.23-2.20 (m, 1 H), 2.11 (br s, 1 H), 2.08-1.92 (comp, 2 H), 1.56 (d,  $J = 11.2$  Hz, 1 H);  $^{13}\text{C}$  NMR (75 MHz)  $\delta$  164.2, 160.9, 145.7, 143.9, 139.6, 137.9, 128.9, 126.7, 122.9, 121.9, 115.8 (d,  $J_{\text{C-F}} = 21.3$  Hz), 59.1, 45.7, 40.2, 39.4, 31.5; IR (thin film, neat) 2941, 2852, 1526, 1224  $\text{cm}^{-1}$ ; mass spectrum (ESI)  $m/z$  254.1344 [ $\text{C}_{17}\text{H}_{17}\text{FN}$  (M+1) requires 254.1355]; LCMS purity 98%.

**Representative procedure for hydrogenolysis of benzyl carbamates **20**{2,7-9}.**

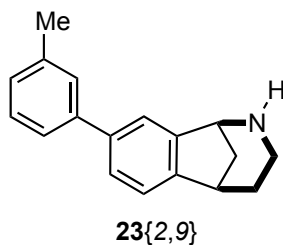

**8-(*m*-Tolyl)-2,3,4,5-tetrahydro-1*H*-1,5-methanobenzo[*c*]azepine (**23**{2,9}).** A solution of **20**{2,9} (224 mg, 0.58 mmol) in EtOH (15 mL) and 10% Pd/C (93 mg) was stirred under an atmosphere of H<sub>2</sub> for 1 h at room temperature followed by concentration under reduced pressure. The residue was filtered through a plug of Celite<sup>®</sup> with multiple portions of EtOAc and the filtrate was concentrated under reduced pressure to provide 112 mg (77%) of **23**{2,9} as a yellow oil that was of sufficient purity for use in subsequent reactions: <sup>1</sup>H NMR (400 MHz) δ 7.48-7.45 (comp, 2 H), 7.42-7.38 (comp, 2 H), 7.32 (t, *J* = 7.4 Hz, 1 H), 7.25 (d, *J* = 7.4 Hz, 1 H), 7.15 (br d, *J* = 7.4 Hz, 1 H), 4.27 (d, *J* = 4.0 Hz, 1 H), 3.25-3.20 (m, 1 H), 2.73 (dd, *J* = 12.2, 5.8 Hz, 1 H), 2.42 (s, 3 H), 2.37 (td, *J* = 12.2, 4.6 Hz, 1 H), 2.25-2.19 (m, 1 H), 2.03-1.96 (m, 1 H), 1.95 (d, *J* = 10.4 Hz, 1 H), 1.78 (br s, 1 H), 1.60-1.55 (m, 1 H); <sup>13</sup>C NMR (125 MHz) δ 145.3, 143.4, 141.5, 140.5, 138.2, 128.6, 127.9, 127.7, 126.7, 124.2, 122.5, 121.8, 58.9, 45.3, 40.0, 39.2, 31.2, 21.5; IR (thin film, neat) 3052, 2942, 2853, 1273 cm<sup>-1</sup>; mass spectrum (ESI) *m/z* 250.1588 [C<sub>18</sub>H<sub>20</sub>N (M+1) requires 250.1596]; LCMS purity 97%.

**Representative procedure for reductive amination of norbenzomorphans **22** and **23**.**

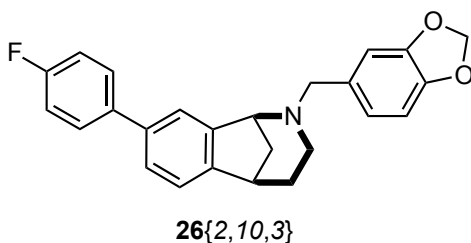

**2-(Benzo[*d*][1,3]dioxol-5-ylmethyl)-8-(4-fluorophenyl)-2,3,4,5-tetrahydro-1*H*-1,5-methanobenzo[*c*]azepine (**26**{2,10,3}).** A solution of amine **23**{2,10} (25 mg, 0.098 mmol), Na(OAc)<sub>3</sub>BH (33 mg, 0.16 mmol), piperonal (**24**{3}) (30 mg, 0.20 mmol) and acetic acid (10 μL) in

1,2-dichloroethane (2 mL) was stirred for 24 h at room temperature. The reaction was quenched with an aqueous, saturated NaHCO<sub>3</sub> solution (2 mL) and the layers were separated. The aqueous layer was extracted with CH<sub>2</sub>Cl<sub>2</sub> (3 x 3 mL), and the combined organic layers were dried (K<sub>2</sub>CO<sub>3</sub>), filtered and concentrated under reduced pressure. The crude product was purified via radial plc (SiO<sub>2</sub>) eluting with hexanes/EtOAc (100:0; 90:10; 80:20) to give 27 mg (71%) of **26**{2,10,3} as a white solid: mp 106-108 °C; <sup>1</sup>H NMR (300 MHz) δ 7.63-7.58 (m, 2 H), 7.45 (d, *J* = 6.3 Hz, 1 H), 7.35 (s, 1 H), 7.31-7.29 (m, 1 H), 7.21-7.15 (m, 2 H), 6.99 (s, 1 H), 6.83-6.77 (m, 2 H), 5.97 (s, 2 H), 3.97 (d, *J* = 4.5 Hz, 1 H), 3.43 (d, *J* = 13.3 Hz, 1 H), 3.23 (d, *J* = 13.3, 1 H), 3.21-3.19 (m, 1 H), 2.62-2.57 (m, 1 H), 2.30-2.20 (m, 1 H), 2.11-2.05 (m, 1 H), 1.99 (d, *J* = 10.5 Hz, 1 H), 1.59-1.51 (m, 2 H); <sup>13</sup>C NMR (75 MHz) δ 162.6 (d, *J*<sub>C-F</sub> = 244 Hz), 147.9, 146.7, 146.1, 140.2, 138.7, 138.1, 133.3, 129.0, 128.9, 126.7, 123.0, 122.2, 115.8 (d, *J*<sub>C-F</sub> = 21.3 Hz), 109.7, 108.1, 101.1, 62.9, 60.3, 47.1, 44.9, 39.9, 30.5; IR (thin film, neat) 2942, 1492, 1238, 1039 cm<sup>-1</sup>; mass spectrum (ESI) *m/z* 388.1711 [C<sub>25</sub>H<sub>23</sub>FNO<sub>2</sub> (M+1) requires 388.1707]; LCMS purity 100%.

### Representative procedure for *N*-sulfonylation of norbenzomorphans **22** and **23**.

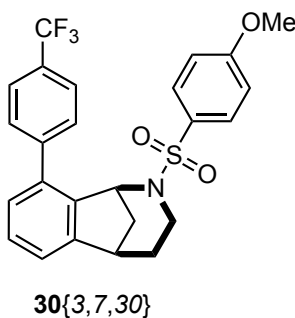

**2-((4-Methoxyphenyl)sulfonyl)-9-(4-(trifluoromethyl)phenyl)-2,3,4,5-tetrahydro-1*H*-1,5-methanobenzo[*c*]azepine (30{3,7,30})**. *p*-Methoxybenzenesulfonyl chloride (**24**{30}) (28 mg, 0.14 mmol) was added to a stirred solution of amine **23**{3,7} (21 mg, 0.07 mmol) and Et<sub>3</sub>N (28 mg, 0.28 mmol) in CH<sub>2</sub>Cl<sub>2</sub> (1 mL) at room temperature. The solution was stirred for 12 h, and the mixture was concentrated under reduced pressure and purified via radial plc (SiO<sub>2</sub>), eluting with hexanes/EtOAc (100:0; 95:5; 90:10) to provide 28 mg (85%) of sulfonamide **30**{3,7,30} as a colorless oil: NMR (400 MHz) δ 7.71-7.64 (comp, 6 H), 7.38 (t, *J* = 7.6 Hz, 1 H), 7.30-7.24 (comp, 3 H), 6.92 (d, *J* = 8.8 Hz, 2 H), 5.27 (d, *J* = 4.0 Hz, 1 H), 3.88 (s, 3 H), 3.74 (dd, *J* = 14.4, 6.0 Hz, 1 H), 3.28-3.23 (m, 1 H), 2.84-2.75 (m, 1 H), 1.97-1.89 (m, 1 H), 1.88-1.82 (m, 1 H), 1.70 (d, *J* = 11.2 Hz, 1 H), 1.56-1.52 (m, 1 H);

$^{13}\text{C}$  NMR (125 MHz)  $\delta$  162.7, 147.9, 143.3, 137.9, 137.2, 133.0, 129.6, 129.4, 129.1, 128.0, 125.5, 125.4, 125.3, 122.5, 114.2, 58.4, 55.6, 41.8, 40.5, 40.0, 29.9; IR (thin film, neat) 2949, 2262, 1733, 1602, 1499, 1327, 1259  $\text{cm}^{-1}$ ; mass spectrum (ESI)  $m/z$  474.1342 [ $\text{C}_{25}\text{H}_{23}\text{NO}_3\text{F}_3\text{S}$  (M+1) requires 474.1351]; LCMS purity 100%.

### Representative procedure for acylation of norbenzomorphans **22** and **23**.

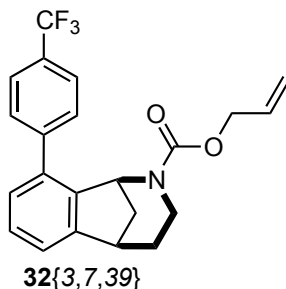

**Allyl 9-(4-(trifluoromethyl)phenyl)-4,5-dihydro-1H-1,5-methanobenzo[*c*]azepine-2(3H)-carboxylate (32{3,7,39}).** Allyl chloroformate (**24{39}**) (29 mg, 0.24 mmol) was added to a solution of amine **23{3,7}** (37 mg, 0.12 mmol) and  $\text{Et}_3\text{N}$  (37 mg, 0.37 mmol) in  $\text{CH}_2\text{Cl}_2$  (0.75 mL) at room temperature, and the solution was stirred for 15 h. The mixture was concentrated under reduced pressure, and the residue was purified via radial plc ( $\text{SiO}_2$ ) eluting with hexanes/EtOAc (100:0; 95:5) to give 34 mg (73%) of **32{3,7,39}** as a white solid: mp 76-77  $^\circ\text{C}$ ;  $^1\text{H}$  NMR (400 MHz)  $\delta$  7.64 (d,  $J = 8.2$  Hz, 2 H), 7.46 (d,  $J = 8.2$  Hz, 2 H), 7.38 (t,  $J = 7.6$  Hz, 1 H), 7.31-7.24 (comp, 2 H), 6.01-5.92 and 5.83-5.73 (rotomers, m, 1 H), 5.42-5.25 (m, 1 H), 5.24-5.14 (m, 2 H), 4.70-4.18 (m, 2 H), 4.05-3.98 (m, 1 H), 3.38 (app br s, 1 H), 2.72 and 2.57 (rotomers, td,  $J = 13, 4.8$  Hz, 1 H), 2.19-2.16 (m, 1 H), 2.10-1.99 (m, 1 H), 1.92-1.86 (m, 1 H), 1.68-1.63 (m, 1 H);  $^{13}\text{C}$  NMR (75 MHz)  $\delta$  (rotomers) 154.3, 154.1, 148.1, 147.8, 144.1, 143.7, 139.0, 138.8, 137.2, 133.5, 133.1, 129.8, 129.3, 127.9, 126.3, 125.5, 125.4, 122.7, 122.6, 117.9, 117.3, 66.3, 66.1, 56.7, 44.6, 44.3, 40.6, 39.0, 38.7, 31.1, 30.8; IR (thin film, neat) 3052, 2942, 2880, 1705, 1417, 1334, 1128  $\text{cm}^{-1}$ ; mass spectrum (ESI)  $m/z$  388.1521 [ $\text{C}_{22}\text{H}_{21}\text{NO}_2\text{F}_3$ (M+1) requires 388.1524]; LCMS purity 100%.

### Representative procedure for thiourea synthesis from **22** and **23**.



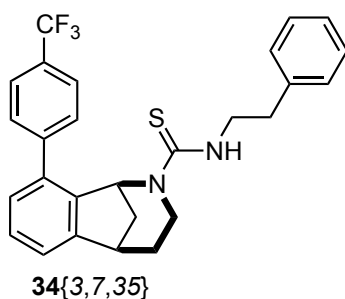

***N*-Phenethyl-9-(4-(trifluoromethyl)phenyl)-4,5-dihydro-1*H*-1,5-methanobenzo[*c*]azepine-2(3*H*)-carbothioamide (34{3,7,35})**. Phenethylisothiocyanate **24{35}** (33 mg, 0.20 mmol) was added to a solution of amine **23{3,7}** (46 mg, 0.1 mmol) and Et<sub>3</sub>N (10 mg, 0.1 mmol) in CH<sub>2</sub>Cl<sub>2</sub> (0.75 mL) at room temperature and was stirred for 24 h. The reaction was concentrated, and the residue was purified via radial plc (SiO<sub>2</sub>), eluting with hexanes/EtOAc (100:0; 90:10; 80:20) to give 41 mg (89%) of **34{3,7,35}** as a white solid: mp (DCM/CH<sub>3</sub>CN 3:1) 165-166 °C; <sup>1</sup>H NMR (400 MHz) δ 7.65 (d, *J* = 8.0 Hz, 2 H), 7.41-7.38 (m, 3 H), 7.24 (comp, 4 H), 7.18 (comp, 3 H), 5.24 (t, *J* = 4.8 Hz, 1 H), 4.03-3.95 (m, 1 H), 3.81-3.75 (m, 1 H), 3.43-3.40 (m, 1 H), 2.98-2.91 (m, 1 H), 2.88-2.74 (comp, 3 H), 2.17-2.14 (m, 1 H), 2.11-2.03 (m, 1 H), 1.89 (d, *J* = 10.8 Hz, 1 H), 1.67 (d, *J* = 12.8 Hz, 1 H); <sup>13</sup>C (125 MHz) δ (rotomers) <sup>13</sup>C (125 MHz) δ 180.5, 147.8, 143.5, 138.8, 138.2, 137.0, 129.6 (q, *J*<sub>C-F</sub> = 32.0 Hz), 129.5, 129.0, 128.7, 128.6, 127.7, 126.6, 125.6 (q, *J*<sub>C-F</sub> = 3.75 Hz), 124.2 (q, *J*<sub>C-F</sub> = 270 Hz), 122.4, 59.5, 46.8, 43.4, 40.8, 35.3, 30.9; IR (thin film, neat) 3397, 2973, 2925, 2863, 1542, 1399, 1330, 1269, 1180, 1139 cm<sup>-1</sup>; mass spectrum (ESI) *m/z* 467.1764 [C<sub>27</sub>H<sub>26</sub>N<sub>2</sub>F<sub>3</sub>S (M+1) requires 467.1691]; LCMS purity 100%.

**Representative procedure for conjugate additions of norbenzomorphans **22** and **23**.**

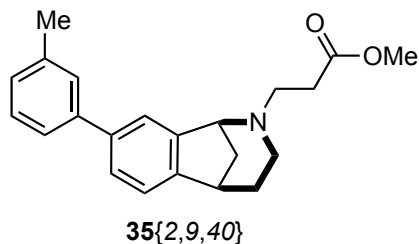

**Methyl 3-(8-(*m*-tolyl)-4,5-dihydro-1*H*-1,5-methanobenzo[*c*]azepin-2(3*H*)-yl)propanoate (35{2,9,40})**. Methyl acrylate **24{40}** (25 mg, 0.28 mmol) was added to a solution of amine **23{2,9}** (36 mg, 0.14 mmol) and Et<sub>3</sub>N (14 mg, 0.14 mmol) in CH<sub>2</sub>Cl<sub>2</sub> (3 mL). After stirring for 19 h at room temperature, the reaction was concentrated under reduced pressure, and the crude product purified via

radial plc (SiO<sub>2</sub>), eluting with hexanes/EtOAc (100:0; 95:0; 90:10) to give 39 mg (83%) of **35**{2,9,40} as a white solid: mp 65-66°C; <sup>1</sup>H NMR (400 MHz) δ 7.46 (dd, *J* = 7.6, 2.4 Hz, 1 H), 7.42-7.38 (comp, 3 H), 7.33 (t, *J* = 7.8 Hz, 1 H), 7.26 (d, *J* = 7.6 Hz, 1 H), 7.18-7.14 (m, 1 H), 3.98 (d, *J* = 4.8 Hz, 1 H), 3.69 (s, 3 H), 3.18-3.14 (m, 1 H), 2.82-2.75 (m, 1 H), 2.64 (dd, *J* = 11.2, 5.2 Hz, 1 H), 2.58-2.53 (m, 2 H), 2.43 (s, 3 H), 2.45-2.38 (m, 1 H), 2.28-2.22 (m, 1 H), 2.00 (td, *J* = 15.2, 2.4 Hz, 1 H), 1.94 (d, *J* = 10.8 Hz, 1 H), 1.59-1.51 (m, 1 H), 1.50-1.44 (m, 1 H); <sup>13</sup>C NMR (75 MHz) δ 173.3, 145.6, 141.8, 139.9, 139.7, 138.5, 128.9, 128.3, 128.0, 126.9, 124.6, 123.1, 122.9, 64.2, 51.9, 51.7, 46.9, 44.9, 39.8, 33.3, 30.4, 21.8; IR (thin film, neat) 2941, 1732, 1478, 1272, 1203; mass spectrum (ESI) *m/z* 336.1963 [C<sub>22</sub>H<sub>26</sub>NO<sub>2</sub> (M+1) requires 336.1964]; LCMS purity 98%.

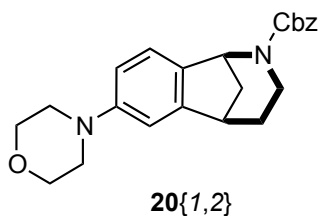

**Benzyl 7-morpholino-4,5-dihydro-1H-1,5-methanobenzo[c]azepine-2(3H)-carboxylate** (**20**{1,2}). 88%, colorless oil. <sup>1</sup>H NMR (400 MHz) δ 7.42-7.28 (comp, 5 H), 7.23 and 7.12 (rotomers, d, *J* = 7.4 Hz, 1 H), 6.83 (d, *J* = 2.4 Hz, 1 H), 6.78-6.71 (m, 1 H), 5.47-5.44 and 5.36-5.34 (rotomers, m, 1 H), 5.21-5.10 (comp, 2 H), 3.86 (t, *J* = 4.9 Hz, 4 H), 3.86-3.75 (m, 1 H), 3.24-3.20 (m, 1 H), 3.17 and 3.16 (rotomers, t, *J* = 4.9 Hz, 4 H), 2.54-2.38 (m, 1 H), 2.26-2.12 (m, 1 H), 2.03-1.90 (m, 1 H), 1.86 (app d, *J* = 10 Hz, 1 H), 1.65-1.50 (m, 1 H); <sup>13</sup>C NMR (75 MHz) δ (rotomers) 155.1, 152.2, 148.0, 137.2, 132.9, 132.7, 128.7, 128.2, 128.1, 124.7, 124.6, 114.4, 110.8, 67.2, 67.1, 57.4, 57.1, 50.0, 44.3, 40.5, 38.8, 30.6; IR (thin film, neat) 2956, 2859, 1662, 1424, 1238, 1108 cm<sup>-1</sup>; mass spectrum (ESI) *m/z* 379.2017 [C<sub>23</sub>H<sub>27</sub>N<sub>2</sub>O<sub>3</sub> (M+1) requires 379.2016]; LCMS purity 97%.

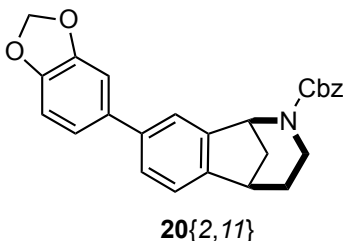

**Benzyl 8-(benzo[*d*][1,3]dioxol-5-yl)-4,5-dihydro-1*H*-1,5-methanobenzo[*c*]azepine-2(3*H*)-carboxylate (20{2,11}).** 73%, colorless, viscous oil:  $^1\text{H}$  NMR (400 MHz)  $\delta$  7.52-7.28 (comp, 7 H), 7.27 (d,  $J = 7.6$  Hz, 1 H), 7.08-7.01 (comp, 2 H), 6.88 (d,  $J = 7.6$  Hz, 1 H), 6.00 (s, 2 H), 5.93-5.89 and 5.47-5.44 (rotomers, m, 1 H), 5.29-5.14 (comp, 2 H), 3.95-3.80 (m, 1 H), 3.31 (app s, 1 H), 2.60-2.48 (m, 1 H), 2.31-2.18 (m, 1 H), 2.07-1.98 (m, 1 H), 1.92 (d,  $J = 11.2$  Hz, 1 H), 1.72-1.58 (m, 1 H);  $^{13}\text{C}$  NMR (100 MHz)  $\delta$  (rotomers) 155.3, 155.1, 148.4, 147.2, 145.3, 142.1, 140.5, 137.3, 135.7, 128.7, 128.2, 127.3, 123.2, 122.6, 122.4, 120.8, 108.8, 107.9, 101.4, 67.3, 57.9, 57.6, 44.0, 39.7, 38.9, 30.5; IR (thin film, neat) 2945, 1696, 1475, 1235  $\text{cm}^{-1}$ ; mass spectrum (ESI)  $m/z$  414.1706 [ $\text{C}_{26}\text{H}_{24}\text{NO}_4$  (M+1) requires 414.1700]; LCMS purity 99%.

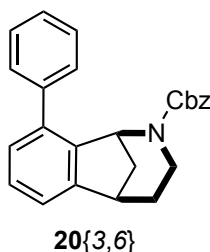

**Benzyl 9-phenyl-4,5-dihydro-1*H*-1,5-methanobenzo[*c*]azepine-2(3*H*)-carboxylate (20{3,6}).** 82%, white solid: mp 97-98  $^{\circ}\text{C}$ ;  $^1\text{H}$  NMR (400 MHz)  $\delta$  7.39-7.23 (comp, 13 H), 5.43 (dd,  $J = 17.0, 3.8$  Hz, 1 H), 5.27 and 5.00 (rotomers, d,  $J = 12.4$  Hz, 1 H), 5.11 (dd,  $J = 12.4, 4.4$  Hz, 1 H), 4.10-3.99 (m, 1 H), 3.37 (app s, 1 H), 2.75 and 2.64 (rotomers, td,  $J = 12.9, 4.8$  Hz, 1 H), 2.21-2.13 (m, 1 H), 2.11-1.98 (m, 1 H), 1.92-1.85 (m, 1 H), 1.72-1.58 (m, 1 H);  $^{13}\text{C}$  NMR (75 MHz) (rotomers)  $\delta$  154.7, 154.6, 147.8, 147.6, 140.5, 140.2, 138.8, 138.6, 137.5, 137.1, 129.1, 128.9, 128.7, 128.6, 128.5, 128.2, 128.1, 128.0, 127.9, 127.6, 127.4, 121.9, 121.7, 67.2, 67.1, 57.0, 56.9, 44.5, 40.7, 39.1, 38.9, 31.2, 30.9; IR (thin film, neat) 3066, 2935, 1698, 1437, 1314, 1259, 1197  $\text{cm}^{-1}$ ; mass spectrum (ESI)  $m/z$  392.1629 [ $\text{C}_{25}\text{H}_{23}\text{NNaO}_2$  (M+Na) requires 392.1626]; LCMS purity 98%.

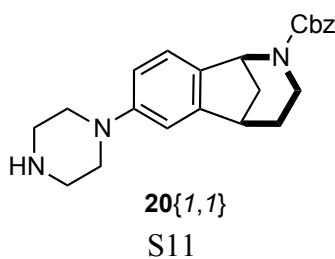

**Benzyl 7-(piperazin-1-yl)-4,5-dihydro-1H-1,5-methanobenzo[c]azepine-2(3H)-carboxylate (20{1,1}).** 75%, colorless oil. <sup>1</sup>H NMR (400 MHz) δ 7.44-7.27 (comp, 5 H), 7.21 and 7.09 (rotomers, d, *J* = 7.6 Hz, 1 H), 6.83 (d, *J* = 2.4 Hz, 1 H), 6.78-6.70 (m, 1 H), 5.44-5.42 and 5.34-5.31 (rotomers, m, 1 H), 5.22-5.06 (comp, 2 H), 3.88-3.73 (m, 1 H), 3.22-3.00 (comp, 8 H), 2.80-2.68 (m, 1 H), 2.52-2.38 (m, 1 H), 2.24-2.12 (m, 1 H), 2.05-1.90 (m, 1 H), 1.84 (d, *J* = 10.4 Hz, 1 H), 1.62-1.50 (m, 1 H); <sup>13</sup>C NMR (75 MHz) (rotomers) δ 155.1, 152.7, 147.9, 137.4, 137.2, 132.6, 132.3, 128.7, 128.1, 128.0, 124.6, 124.4, 114.7, 111.2, 67.1, 57.4, 57.2, 51.0, 46.5, 44.3, 40.5, 38.8, 30.6; IR (thin film, neat) 2942, 2825, 1692, 1417, 1231, 1101 cm<sup>-1</sup>; mass spectrum (ESI) *m/z* 378.21766 [C<sub>23</sub>H<sub>28</sub>N<sub>3</sub>O<sub>2</sub> (M+1) requires 378.21815]; LCMS purity 99%.

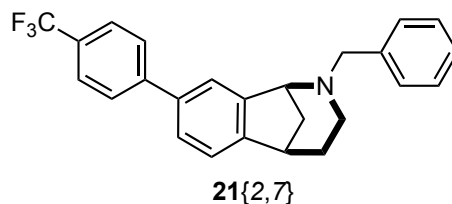

**2-Benzyl-8-(4-(trifluoromethyl)phenyl)-2,3,4,5-tetrahydro-1H-1,5-methanobenzo[c]azepine (21{2,7}).** 91%, tan solid: mp 101-103 °C; 7.54-7.71 (comp, 4 H), 7.50 (d, *J* = 7.6 Hz, 1 H), 7.43-7.25 (comp, 7 H), 4.00 (d, *J* = 4.8 Hz, 1 H), 3.51 (d, *J* = 13.2 Hz, 1 H), 3.35 (d, *J* = 13.2 Hz, 1 H), 3.23-3.19 (m, 1 H), 2.64 (dd, *J* = 10.0, 5.6 Hz, 1 H), 2.27-2.20 (m, 1 H), 2.11-2.07 (m, 1 H), 2.04 (app d, *J* = 11.2 Hz, 1 H), 1.62-1.58 (m, 1 H), 1.57 (app d, *J* = 9.2 Hz, 1 H); <sup>13</sup>C NMR (75 MHz) δ 147.3, 145.4, 138.4, 129.5, 129.2, 128.7, 127.7, 127.4, 127.2, 126.4, 126.1, 126.0, 125.9, 123.3, 122.8, 63.0, 60.4, 47.3, 44.6, 39.8, 29.9; IR (thin film, neat) 2946, 2851, 1321, 1131 cm<sup>-1</sup>; mass spectrum (ESI) *m/z* 394.17780 [C<sub>25</sub>H<sub>23</sub>F<sub>3</sub>N (M+1) requires 394.17771]; LCMS purity 96%.

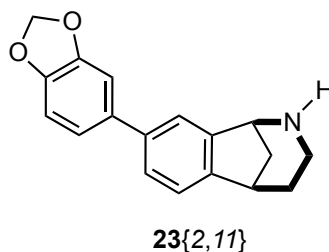

**8-(Benzo[*d*][1,3]dioxol-5-yl)-2,3,4,5-tetrahydro-1*H*-1,5-methanobenzo[*c*]azepine (23{2,11}).**

93%, colorless oil:  $^1\text{H}$  NMR (400 MHz)  $\delta$  7.33-7.28 (comp, 2 H), 7.14 (d,  $J = 7.8$  Hz, 1H), 6.99-6.95 (comp, 2 H), 6.78 (d,  $J = 7.8$  Hz, 1 H), 5.90 (s, 2 H), 4.18 (d,  $J = 4.0$  Hz, 1 H), 3.15-3.09 (m, 1 H), 2.65 (dd,  $J = 12.0, 5.6$  Hz, 1 H), 2.28 (td,  $J = 12.0, 4.7$  Hz, 1 H), 2.17-2.11 (m, 1 H), 2.00 (app s, 1 H), 1.95-1.85 (m, 1 H), 1.86 (d,  $J = 10.4$  Hz, 1 H), 1.52-1.44 (m, 1 H); IR (thin film, neat) 2951, 1509, 1482, 1228, 1041  $\text{cm}^{-1}$ ; mass spectrum (ESI)  $m/z$  280.1337 [ $\text{C}_{18}\text{H}_{18}\text{NO}_2$  (M+1) requires 280.1332]; LCMS purity 95%.

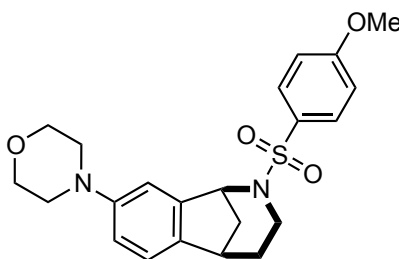

**30{2,2,30}**

**4-(2-((4-Methoxyphenyl)sulfonyl)-2,3,4,5-tetrahydro-1*H*-1,5-methanobenzo[*c*]azepin-8-**

**yl)morpholine (30{2,2,30}).** 62%, white solid: mp (EtOH) 176-177  $^{\circ}\text{C}$ ;  $^1\text{H}$  NMR (400 MHz)  $\delta$  7.73 (dd,  $J = 6.8, 2.0$  Hz, 2 H), 7.03 (d,  $J = 8.0$  Hz, 1 H), 6.95 (dd,  $J = 6.8, 2.0$  Hz, 2 H), 6.69 (dd,  $J = 8.0, 2.4$  Hz, 1 H), 6.07 (d,  $J = 2.4$  Hz, 1 H), 4.99 (d,  $J = 4.0$  Hz, 1 H), 3.86 (s, 3 H), 3.78 (td,  $J = 4.8, 1.6$  Hz, 4 H), 3.64 (dd,  $J = 11.9, 6.0$  Hz, 1 H), 3.15 (br s, 1 H), 2.96-2.81 (m, 4 H), 2.29 (td,  $J = 11.9, 4.4$  Hz, 1 H), 2.19-2.11 (m, 1 H), 2.10-2.01 (m, 1 H), 1.95 (d,  $J = 10.8$  Hz, 1 H), 1.55 (br d,  $J = 12.4$  Hz, 1 H);  $^{13}\text{C}$  NMR (75 MHz)  $\delta$  162.9, 150.9, 139.6, 138.0, 132.3, 129.7, 123.0, 116.3, 114.4, 112.2, 67.1, 59.9, 55.8, 50.2, 44.7, 40.6, 39.0, 30.6; IR (thin film, neat) 2917, 1593, 1494, 1326, 1253, 1156  $\text{cm}^{-1}$ ; mass spectrum (ESI)  $m/z$  415.1687 [ $\text{C}_{22}\text{H}_{27}\text{N}_2\text{O}_4\text{S}$  (M+1) requires 415.1692]; LCMS purity 100%.

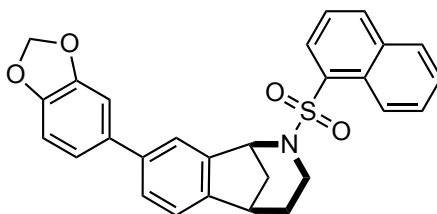

**30{2,11,24}**

**8-(Benzo[*d*][1,3]dioxol-5-yl)-2-(naphthalen-1-ylsulfonyl)-2,3,4,5-tetrahydro-1*H*-1,5-methanobenzo[*c*]azepine (30{2,11,24}).** 59%, white foam. <sup>1</sup>H NMR (400 MHz) δ 8.72 (d, *J* = 8.6 Hz, 1 H), 8.29 (dd, *J* = 7.5, 1.4 Hz, 1 H), 8.02 (d, *J* = 8.6 Hz, 1 H), 7.87 (d, *J* = 7.5 Hz, 1 H), 7.64-7.59 (m, 1 H), 7.57-7.52 (comp, 2 H), 7.27 (d, *J* = 8.4 Hz, 1 H), 7.14 (d, *J* = 7.6 Hz, 1 H), 6.82 (d, *J* = 8.4 Hz, 1 H), 6.71 (dd, *J* = 8.4, 1.7 Hz, 1 H), 6.66 (d, *J* = 1.7 Hz, 1 H), 6.62-6.61 (m, 1 H), 6.02 (s, 2 H), 5.19 (d, *J* = 4.0 Hz, 1 H), 3.65 (dd, *J* = 12.0, 6.0 Hz, 1 H), 3.26-3.22 (m, 1 H), 2.45 (td, *J* = 12.0, 4.8 Hz, 1 H), 2.23-2.16 (m, 1 H), 2.08-1.99 (m, 1 H), 1.97 (d, *J* = 11.2 Hz, 1 H), 1.63-1.56 (m, 1 H); <sup>13</sup>C NMR (125 MHz) δ 147.9, 146.9, 144.7, 140.2, 139.5, 135.2, 135.1, 134.4, 134.2, 130.1, 128.9, 128.8, 128.0, 127.2, 126.8, 125.2, 124.3, 122.6, 122.5, 120.5, 108.3, 107.7, 101.1, 58.9, 44.2, 40.2, 39.3, 30.3; IR (thin film, neat) 2969, 2873, 1479, 1341, 1224, 1163 cm<sup>-1</sup>; mass spectrum (ESI) *m/z* 470.14196 [C<sub>28</sub>H<sub>24</sub>NO<sub>4</sub>S (M+1) requires 470.14206]; LCMS purity 100%.

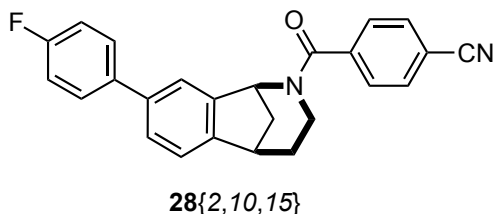

**8-(4-Fluorophenyl)-2,3,4,5-tetrahydro-1*H*-1,5-methanobenzo[*c*]azepine-2-carbonyl)benzonitrile (28{2,10,15}).** 82%, pale green gum. <sup>1</sup>H NMR (400 MHz) δ 7.80 (d, *J* = 8.2 Hz, 1 H), 7.66 (d, *J* = 8.2 Hz, 1 H) 7.65-7.47 (comp, 5 H), 7.46 (d, *J* = 7.6 Hz, 1 H), 7.32 (d, *J* = 7.6 Hz, 1 H), 7.20-7.09 (comp, 2 H), 6.01 and 4.86 (rotomers, d, *J* = 4.2 Hz, 1 H), 4.32 and 3.28 (rotomers, dd, *J* = 13.6, 6.4 Hz, 1 H), 3.45-3.39 (m, 1 H), 2.76 and 2.48 (rotomers, td, *J* = 12.8, 5.2 Hz, 1 H), 2.42-2.35 and 2.27-2.20 (rotomers, m, 1 H), 2.19-2.10 and 1.98-1.90 (rotomers, m, 1 H), 2.00 (d, *J* = 11.6 Hz, 1 H), 1.85-1.77 and 1.62-1.54 (rotomers, m, 1 H); <sup>13</sup>C NMR (75 MHz) (rotomers) δ 167.9, 163.3 (d, *J*<sub>C-F</sub> = 245 Hz), 146.0, 145.4, 144.4, 141.2, 140.8, 140.6, 140.2, 137.2, 133.0, 132.6, 128.9, 128.8, 128.4, 128.1, 127.9, 123.6, 123.4, 123.0, 122.2, 118.4, 116.0 (d, *J*<sub>C-F</sub> = 21.3 Hz), 113.6, 61.4, 55.9, 44.4, 43.0, 40.0, 37.5, 31.5, 30.3; IR (thin film, neat) 2949, 1637, 1437, 1231 cm<sup>-1</sup>; mass spectrum (ESI) *m/z* 383.15611 [C<sub>25</sub>H<sub>20</sub>FN<sub>2</sub>O (M+1) requires 383.15542]; LCMS purity 100%.

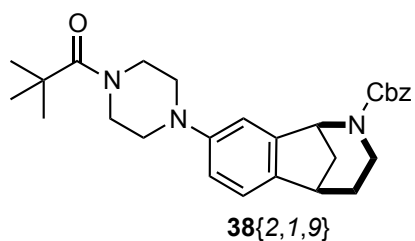

**Benzyl 8-(4-pivaloylpiperazin-1-yl)-4,5-dihydro-1H-1,5-methanobenzo[c]azepine-2(3H)-carboxylate (38{2,1,9}).** 96%, tan semi-solid:  $^1\text{H}$  NMR (400 MHz)  $\delta$  7.44-7.26 (m, 5 H), 7.12 (d,  $J = 8.0$  Hz, 1 H), 6.80 (dd,  $J = 8.2, 2.2$  Hz, 1 H) 6.96 and 6.75 (rotomers, br s, 1 H), 5.45 and 5.34 (rotomers, br s, 1 H), 5.26-5.07 (comp, 2 H), 3.80 (m, 1 H), 3.79 (t,  $J = 4.8$  Hz, 4 H), 3.23-3.19 (m, 1 H), 3.15-3.06 (m, 4 H), 2.50-2.36 (m, 1 H), 2.24-2.12 (m, 1 H), 2.02-1.90 (m, 1 H), 1.85 (d,  $J = 10.8$  Hz, 1 H), 1.62-1.50 (m, 1 H), 1.31 (s, 9 H);  $^{13}\text{C}$  NMR (75 MHz)  $\delta$  (rotomers) 176.6, 155.3, 155.2, 151.0, 142.6, 142.5, 138.6, 137.4, 137.3, 128.7, 128.2, 123.4, 116.8, 116.6, 112.9, 67.2, 58.1, 57.9, 54.0, 50.4, 45.3, 44.0, 39.2, 38.9, 30.7, 28.7; IR (thin film, neat) 2941, 2880, 2818, 1698, 1630, 1417, 1238, 1183  $\text{cm}^{-1}$ ; (ESI)  $m/z$  462.2753 [ $\text{C}_{28}\text{H}_{36}\text{N}_3\text{O}_3$  (M+1) requires 462.2751]; LCMS purity 100%.

*Tabulated Lipinski Parameters*

| Compound #        | Molecular Weight | C log P     | H-Bond Donors | H-Bond Acceptors | Lipinski Rule of 5 |
|-------------------|------------------|-------------|---------------|------------------|--------------------|
| 18{3}             | 327.805          | 4.45        | 0             | 1                | satisfied          |
| 20{1,1}           | 377.479          | 3.42        | 1             | 3                | satisfied          |
| 20{2,4}           | 364.481          | 4.64        | 1             | 2                | satisfied          |
| 20{2,7}           | 437.454          | 6.37        | 0             | 1                | one violation      |
| 20{2,9}           | 399.482          | 5.33        | 0             | 2                | one violation      |
| 20{2,11}          | 413.465          | 5.11        | 0             | 3                | one violation      |
| 21{2}             | 283.795          | 4.60        | 0             | 1                | satisfied          |
| 21{2,3}           | 332.482          | 4.96        | 0             | 2                | satisfied          |
| 21{2,8}           | 355.472          | 5.49        | 0             | 2                | one violation      |
| 23{2,2}           | 244.332          | 1.78        | 1             | 3                | satisfied          |
| 23{2,6}           | 235.324          | 3.54        | 1             | 1                | satisfied          |
| 23{2,8}           | 265.350          | 3.38        | 1             | 2                | satisfied          |
| 23{3,7}           | 303.322          | 4.41        | 1             | 1                | satisfied          |
| 25{2,1}           | 313.821          | 4.44        | 0             | 2                | satisfied          |
| 26{2,2,5}         | 403.345          | 5.09        | 0             | 3                | one violation      |
| 26{2,7,8}         | 317.348          | 4.80        | 0             | 1                | satisfied          |
| 26{2,9,1}         | 369.499          | 6.00        | 0             | 2                | one violation      |
| 26{2,3,4}         | 366.927          | 5.56        | 0             | 2                | one violation      |
| 27{2,10}          | 303.826          | 4.22        | 0             | 1                | satisfied          |
| 28{2,3,19}        | 415.355          | 5.52        | 0             | 2                | one violation      |
| 28{2,6,15}        | 364.439          | 4.82        | 0             | 2                | satisfied          |
| 28{2,11,13}       | 397.466          | 5.14        | 0             | 3                | one violation      |
| 28{2,11,18}       | 459.535          | 6.27        | 0             | 3                | one violation      |
| 28{2,8,9}         | 349.466          | 4.79        | 0             | 2                | satisfied          |
| 28{2,3,10}        | 352.513          | 4.57        | 0             | 2                | satisfied          |
| 28{2,2,20}        | 382.883          | 3.85        | 0             | 3                | satisfied          |
| 28{3,7,11}        | 375.384          | 3.85        | 0             | 2                | satisfied          |
| 29{2,24}          | 383.891          | 4.70        | 0             | 2                | satisfied          |
| 30{2,6,27}        | 313.414          | 2.64        | 0             | 2                | satisfied          |
| 30{2,2,30}        | 414.518          | 2.84        | 0             | 5                | satisfied          |
| 31{2,37}          | 265.735          | 3.08        | 0             | 1                | satisfied          |
| 32{2,8,39}        | 349.423          | 4.34        | 0             | 2                | satisfied          |
| 33{1,31}          | 353.868          | 4.76        | 1             | 1                | satisfied          |
| 33{1,32}          | 388.911          | 4.59        | 1             | 2                | satisfied          |
| 34{3,7,35}        | 466.561          | 6.82        | 1             | 0                | one violation      |
| 35{2,8,41}        | 318.412          | 3.53        | 0             | 3                | satisfied          |
| 38{1,1,21}        | 481.585          | 4.88        | 0             | 3                | satisfied          |
| 38{2,1,9}         | 461.596          | 4.82        | 0             | 3                | satisfied          |
| 39{2,1,30}        | 547.665          | 4.48        | 0             | 5                | one violation      |
| <b>40{1,1,32}</b> | <b>572.718</b>   | <b>5.51</b> | <b>1</b>      | <b>4</b>         | <b>violated</b>    |



STANDARD 1H OBSERVE

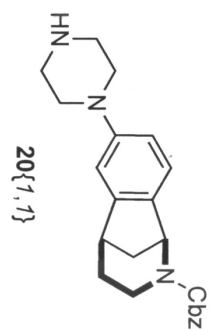

```

exptl std:1h
SAMPLE
date Aug 14 2010
solvent CDC13
file exp
ACQUISITION
sfrq 400.269
in H1
at 2.856
nd 32000
SW 5602.2
fb not used
bs not used
tpwr 58
pw 2.00
dt 2.000
tof 169.3
te 100
cl 78
clock not used
gain not used
flags not used
il n
in n
dp y
DISPLAY
sp -84.4
wp 3808.1
vs 92
sc 0
wc 250
h2mm 15.23
ts 301.56
rfl 614.1
rfl 0
th 8
ins 1.000
nm cdc ph
    
```

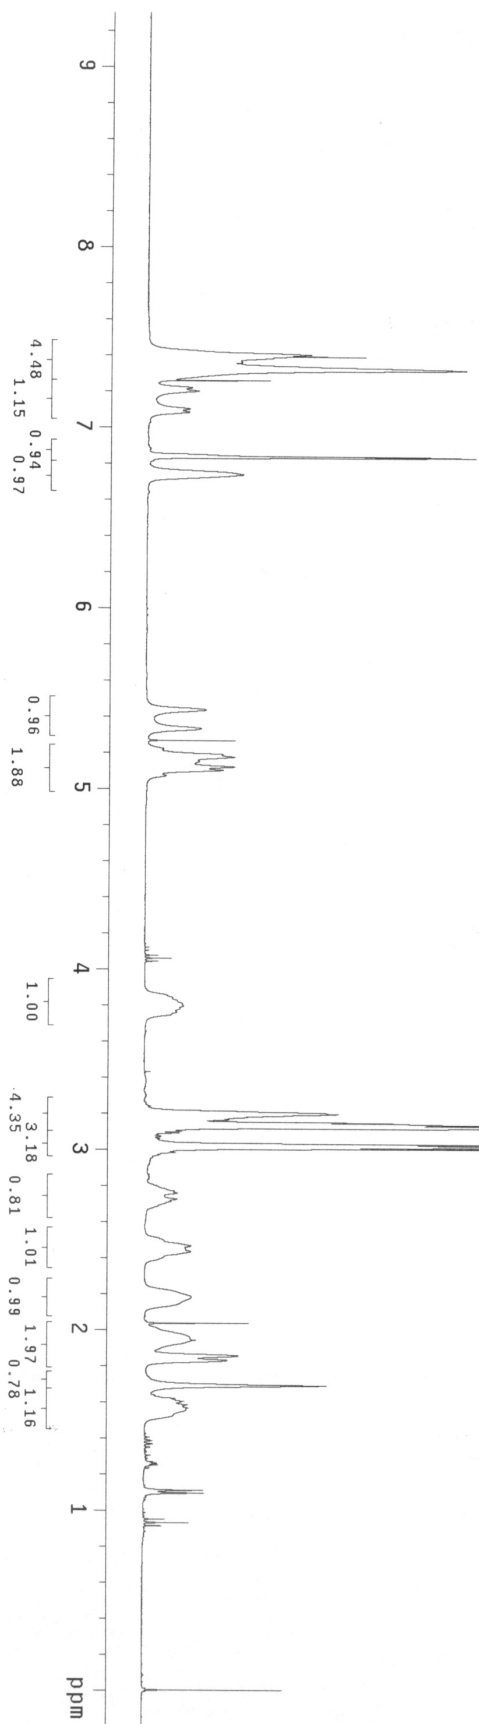

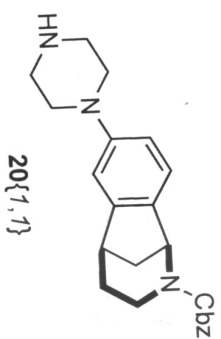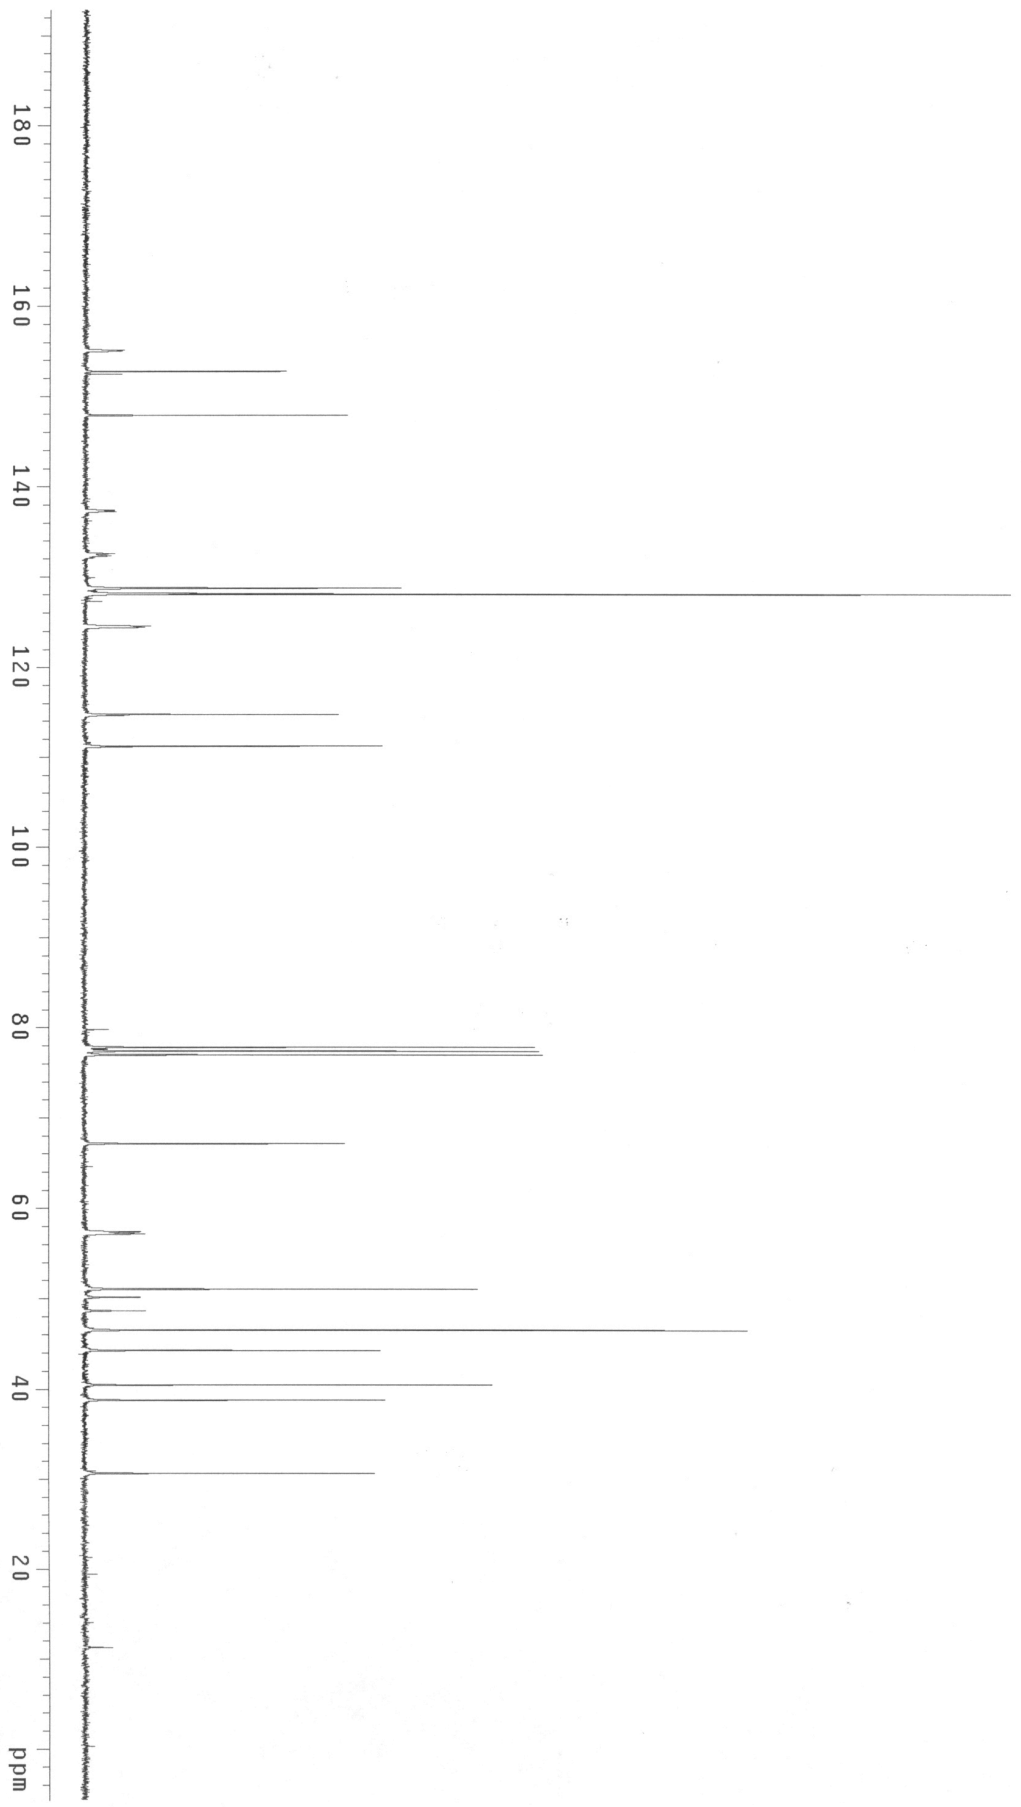

Sample Name: jjs-2-149(piperazine)

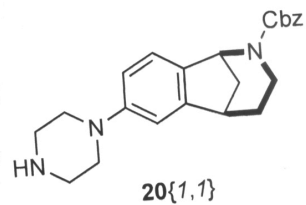

```

=====
Acq. Operator   : sahn@mail.utexas.edu
Acq. Instrument : LCMS
Injection Date  : 4/26/2010 3:03:15 PM
Location       :
Inj Volume     :

Acq. Method    : C:\CHEM32\1\METHODS\SP NIH.M
Last changed   : 4/26/2010 3:03:04 PM by sahn@mail.utexas.edu
                (modified after loading)
Analysis Method: C:\CHEM32\1\METHODS\DEF_LC.M
Last changed   : 11/20/2006 4:14:44 AM
Sample Info    : Easy-Access Method: 'SP NIH'
    
```

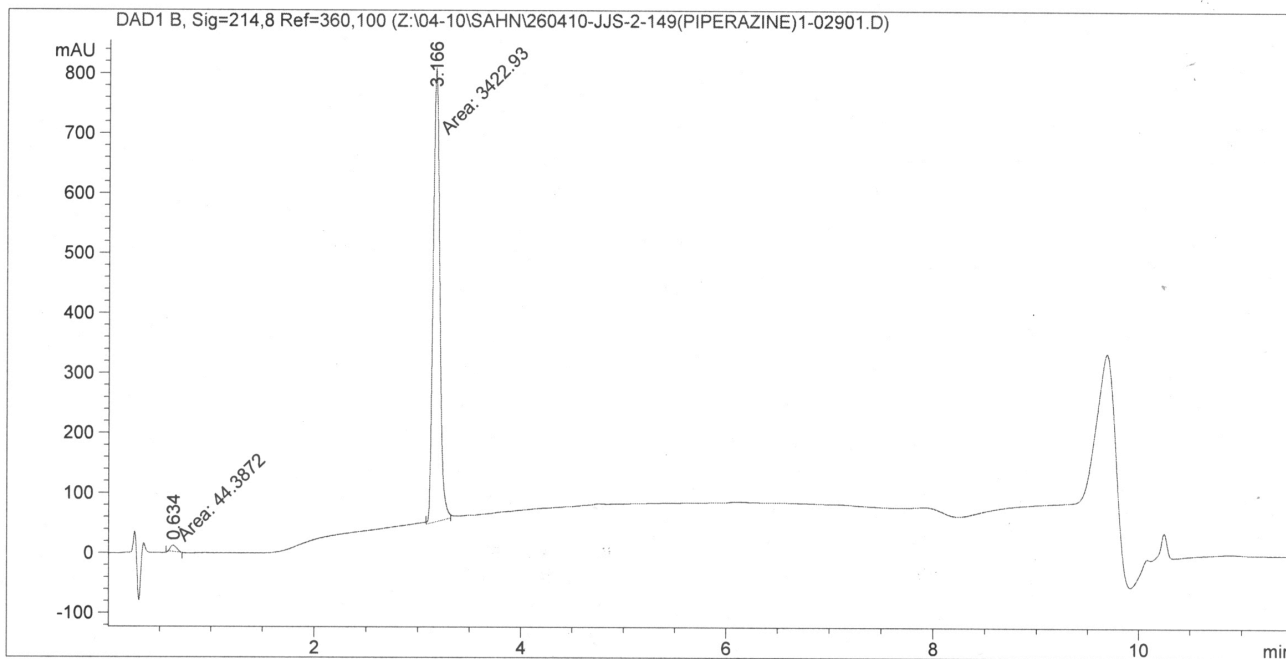

=====  
 Area Percent Report  
 =====

```

Sorted By      :      Signal
Multiplier:    :      1.0000
Dilution:      :      1.0000
Use Multiplier & Dilution Factor with ISTDs
    
```

Signal 1: DAD1 B, Sig=214,8 Ref=360,100

| Peak # | RetTime [min] | Type | Width [min] | Area [mAU*s] | Height [mAU] | Area %  |
|--------|---------------|------|-------------|--------------|--------------|---------|
| 1      | 0.634         | MM   | 0.0707      | 44.38724     | 10.46296     | 1.2802  |
| 2      | 3.166         | MM   | 0.0751      | 3422.92969   | 759.33624    | 98.7198 |

Totals :                      3467.31693    769.79921

STANDARD 1H OBSERVE

expt1 std1h

|             |             |        |            |         |
|-------------|-------------|--------|------------|---------|
| date        | Apr 24 2010 | dfreq  | DEC. & VT  | 400.289 |
| solvent     | GDC13       | dn     | H1         |         |
| file        | exp         | dpwr   | H1         | 30      |
| ACQUISITION | exp         | dof    |            | 0       |
| sfrq        | 400.289     | dm     | mm         |         |
| tn          | H1          | dmm    |            |         |
| at          | 2.856       | dmf    | 200        |         |
| np          | 32000       | lb     | PROCESSING | 0.10    |
| sw          | 5602.2      | wtflie |            |         |
| fb          | not used    | proc   | not used   |         |
| bs          | 2           | tn     |            |         |
| tpwr        | 56          |        |            |         |
| plv         | 2.00        | werr   |            |         |
| d1          | 2.000       | wexp   |            |         |
| tof         | 109.9       | wds    |            |         |
| nt          | 70          | wht    |            |         |
| ct          | 42          |        |            |         |
| alock       | not used    |        |            |         |
| gain        | not used    |        |            |         |
| il          | n           |        |            |         |
| in          | n           |        |            |         |
| dp          | y           |        |            |         |
| DISPLAY     |             |        |            |         |
| sp          | -172.6      |        |            |         |
| wp          | 4624.0      |        |            |         |
| vs          | 164         |        |            |         |
| sc          | 0           |        |            |         |
| wc          | 250         |        |            |         |
| hzmm        | 18.50       |        |            |         |
| ls          | 301.56      |        |            |         |
| rfl         | 614.1       |        |            |         |
| rftl        | 0           |        |            |         |
| th          | 12          |        |            |         |
| ins         | 1.000       |        |            |         |
| nm          | cdc         |        |            |         |
| ph          |             |        |            |         |

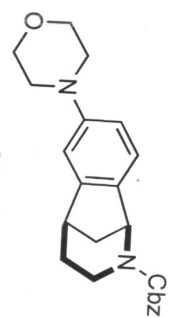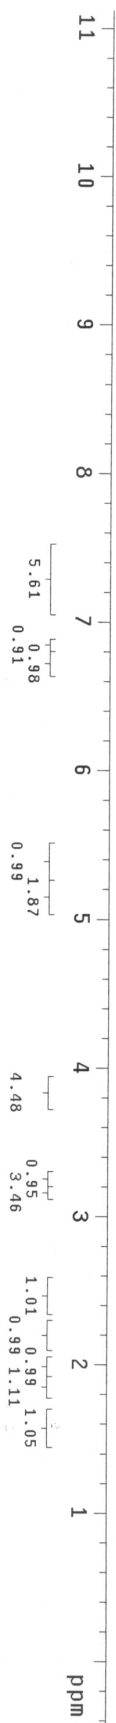

13C OBSERVE

expl std13c

| SAMPLE      |             | DEC. & VT  |          |
|-------------|-------------|------------|----------|
| date        | Apr 28 2010 | dfrq       | 300.141  |
| solvent     | CDC13       | dn         | H1       |
| file        | exp         | dpwr       | 40       |
| ACQUISITION |             | dof        | 400.0    |
| sfrq        | 75.478      | dm         | YYY      |
| tn          | C13         | dmm        | W        |
| at          | 1.777       | dmf        | 8000     |
| np          | 64000       | dres       |          |
| sw          | 18009.9     | dres       | 1.0      |
| fb          | 10000       | homo       | n        |
| bs          | 4           | PROCESSING |          |
| tpwr        | 50          | lb         | 1.00     |
| pw          | 6.0         | wf1le      |          |
| dl          | 2.000       | proc       | ft       |
| tof         | 336.5       | fn         | not used |
| nt          | 1200        | math       | f        |
| ct          | 848         |            |          |
| alock       | n           | werr       |          |
| gain        | 60          | wexp       |          |
| flags       | n           | wbs        |          |
| l1          | n           | wnt        |          |
| l2          | n           |            |          |
| l3          | n           |            |          |
| l4          | n           |            |          |
| l5          | n           |            |          |
| hs          | nm          |            |          |
| DISPLAY     |             |            |          |
| sp          | -853.9      |            |          |
| wp          | 18009.9     |            |          |
| vs          | 151         |            |          |
| sc          | 0           |            |          |
| wc          | 250         |            |          |
| h2mm        | 72.00       |            |          |
| is          | 500.00      |            |          |
| ffl         | 853.9       |            |          |
| tfp         | 0           |            |          |
| tn          | 20          |            |          |
| lms         | 100.000     |            |          |
| nm          |             |            |          |

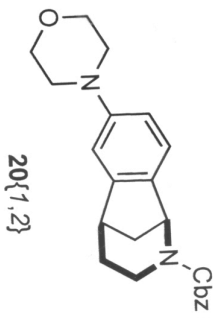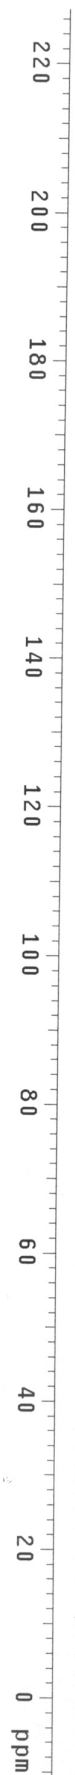

Data File L:\04-10\SAHN\290410-JJS-2-1501-02998.D  
Sample Name: jjs-2-150

=====  
Acq. Operator : sahn@mail.utexas.edu  
Acq. Instrument : LCMS Location : Vial 35  
Injection Date : 4/29/2010 9:34:05 PM Inj Volume : 1.0 µl  
Acq. Method : C:\CHEM32\1\METHODS\SP\_NIH.M  
Last changed : 4/29/2010 9:33:45 PM by sahn@mail.utexas.edu  
(modified after loading)  
Analysis Method : C:\CHEM32\1\METHODS\DEF\_LC.M  
Last changed : 11/20/2006 4:14:44 AM  
Sample Info : Easy-Access Method: 'SP\_NIH'

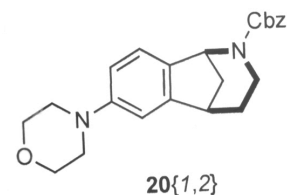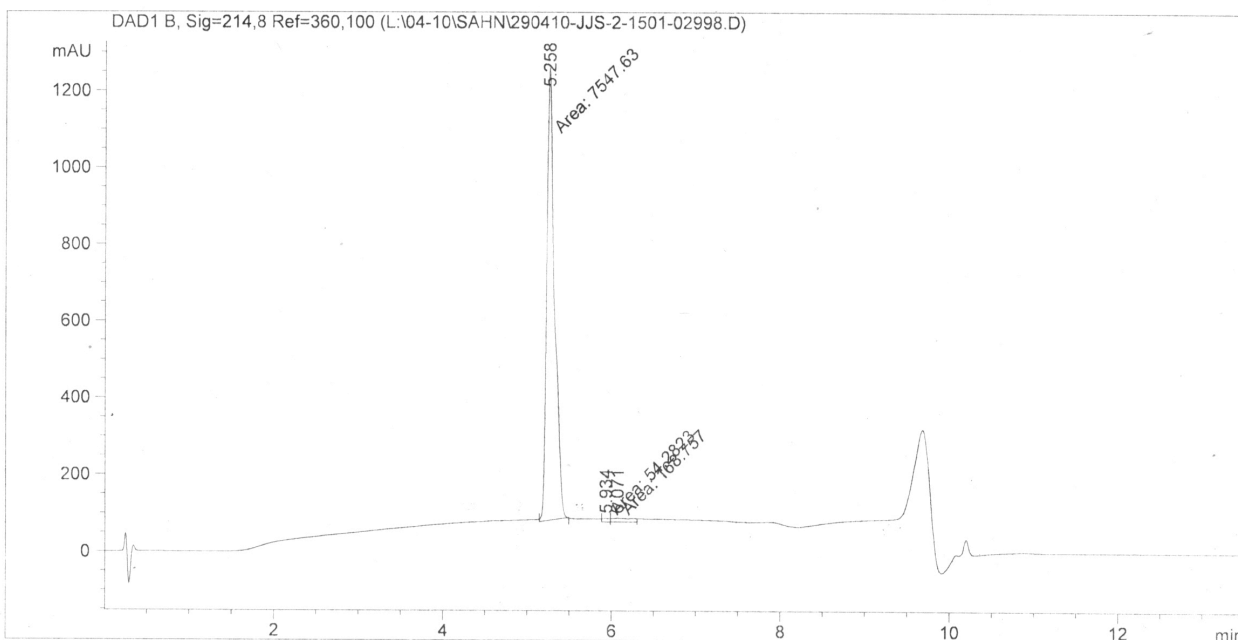

=====  
Area Percent Report  
=====

Sorted By : Signal  
Multiplier: : 1.0000  
Dilution: : 1.0000  
Use Multiplier & Dilution Factor with ISTDs

Signal 1: DAD1 B, Sig=214,8 Ref=360,100

| Peak # | RetTime [min] | Type | Width [min] | Area [mAU*s] | Height [mAU] | Area %  |
|--------|---------------|------|-------------|--------------|--------------|---------|
| 1      | 5.258         | MM   | 0.1065      | 7547.62891   | 1181.65027   | 97.1297 |
| 2      | 5.934         | MM   | 0.1015      | 54.28227     | 8.91613      | 0.6986  |
| 3      | 6.071         | MM   | 0.2922      | 168.75677    | 9.62579      | 2.1717  |

Totals : 7770.66795 1200.19219

STANDARD 1H OBSERVE

expt1 std1h

SAMPLE DEC. & VT  
date Apr 22 2009 dfrq 400.269  
solvent CDC13 dn H1  
file exp dpwr 30  
ACQUISITION 400.269 dm 0  
sfrq 400.269 dm nm  
tn H1 dmm C  
at 2.836 dmf 200  
np 32000 PROCESSING 0.10  
sw 5602.2 wtfllie ft  
fb not used  
bs 2 proc not used  
tpwr 58 fn  
pw 2.0 werr  
dl 2.000 wexp  
tof 169.9 wbs  
nt 60 wnt  
ct 38  
alock not used  
gain n  
gain not used

11 n  
11 n  
in n  
dp y  
DISPLAY  
SP -121.3  
WD 3741.8  
VS 132  
SC 6  
WC 250  
hizmm 14.97  
IS 301.56  
rfl 614.1  
th 0  
ins 8  
nm cdc ph 1.000

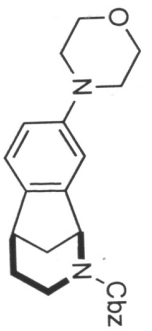

20{2,2}

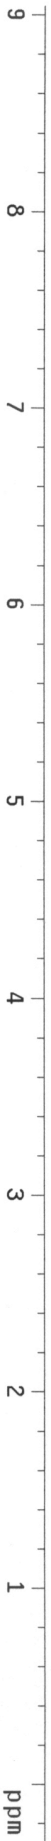

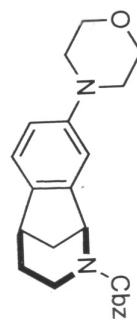

20{2,2}

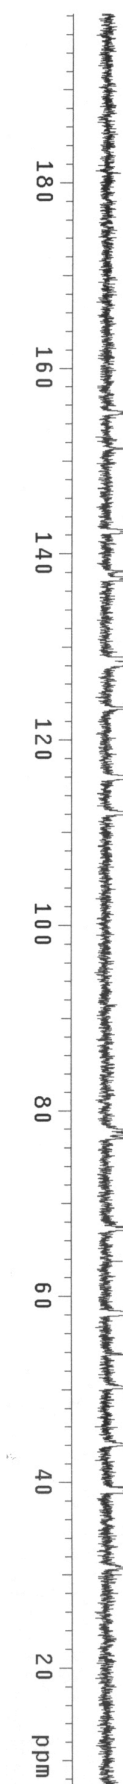



Data File L:\06-12\SAHN\130612-JJS-1-0881-19033.D  
Sample Name: jjs-1-088

=====  
Acq. Operator : sahn@mail.utexas.edu  
Acq. Instrument : LCMS  
Injection Date : 6/13/2012 8:08:33 PM  
Location : Vial 42  
Inj Volume : 1.0 µl  
Acq. Method : C:\CHEM32\1\METHODS\SP NIH.M  
Last changed : 6/13/2012 8:08:18 PM by sahn@mail.utexas.edu  
(modified after loading)  
Analysis Method : C:\CHEM32\1\METHODS\DEEF\_LC.M  
Last changed : 6/13/2012 3:34:08 PM  
(modified after loading)  
Sample Info : Easy-Access Method: 'SP NIH'

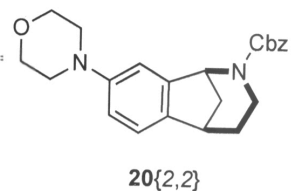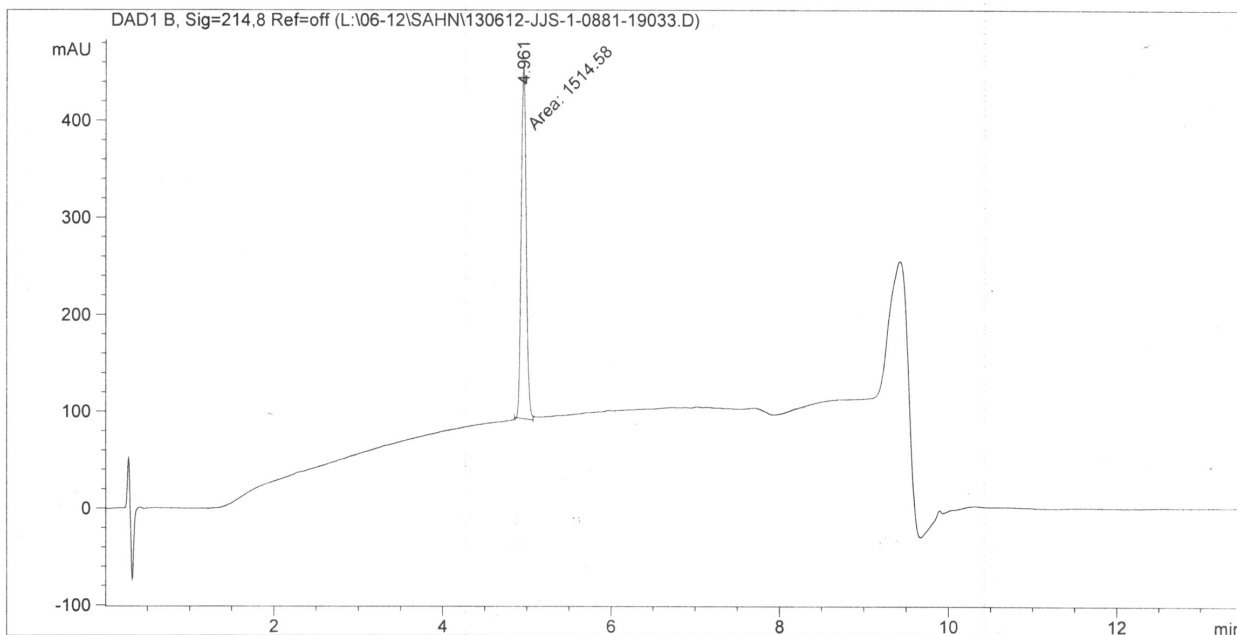

=====  
Area Percent Report  
=====

Sorted By : Signal  
Multiplier: : 1.0000  
Dilution: : 1.0000  
Use Multiplier & Dilution Factor with ISTDs

Signal 1: DAD1 B, Sig=214,8 Ref=off

| Peak # | RetTime [min] | Type | Width [min] | Area [mAU*s] | Height [mAU] | Area %   |
|--------|---------------|------|-------------|--------------|--------------|----------|
| 1      | 4.961         | MM   | 0.0687      | 1514.57874   | 367.32224    | 100.0000 |

Totals : 1514.57874 367.32224

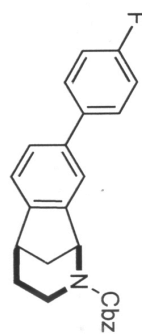

20{2,10}

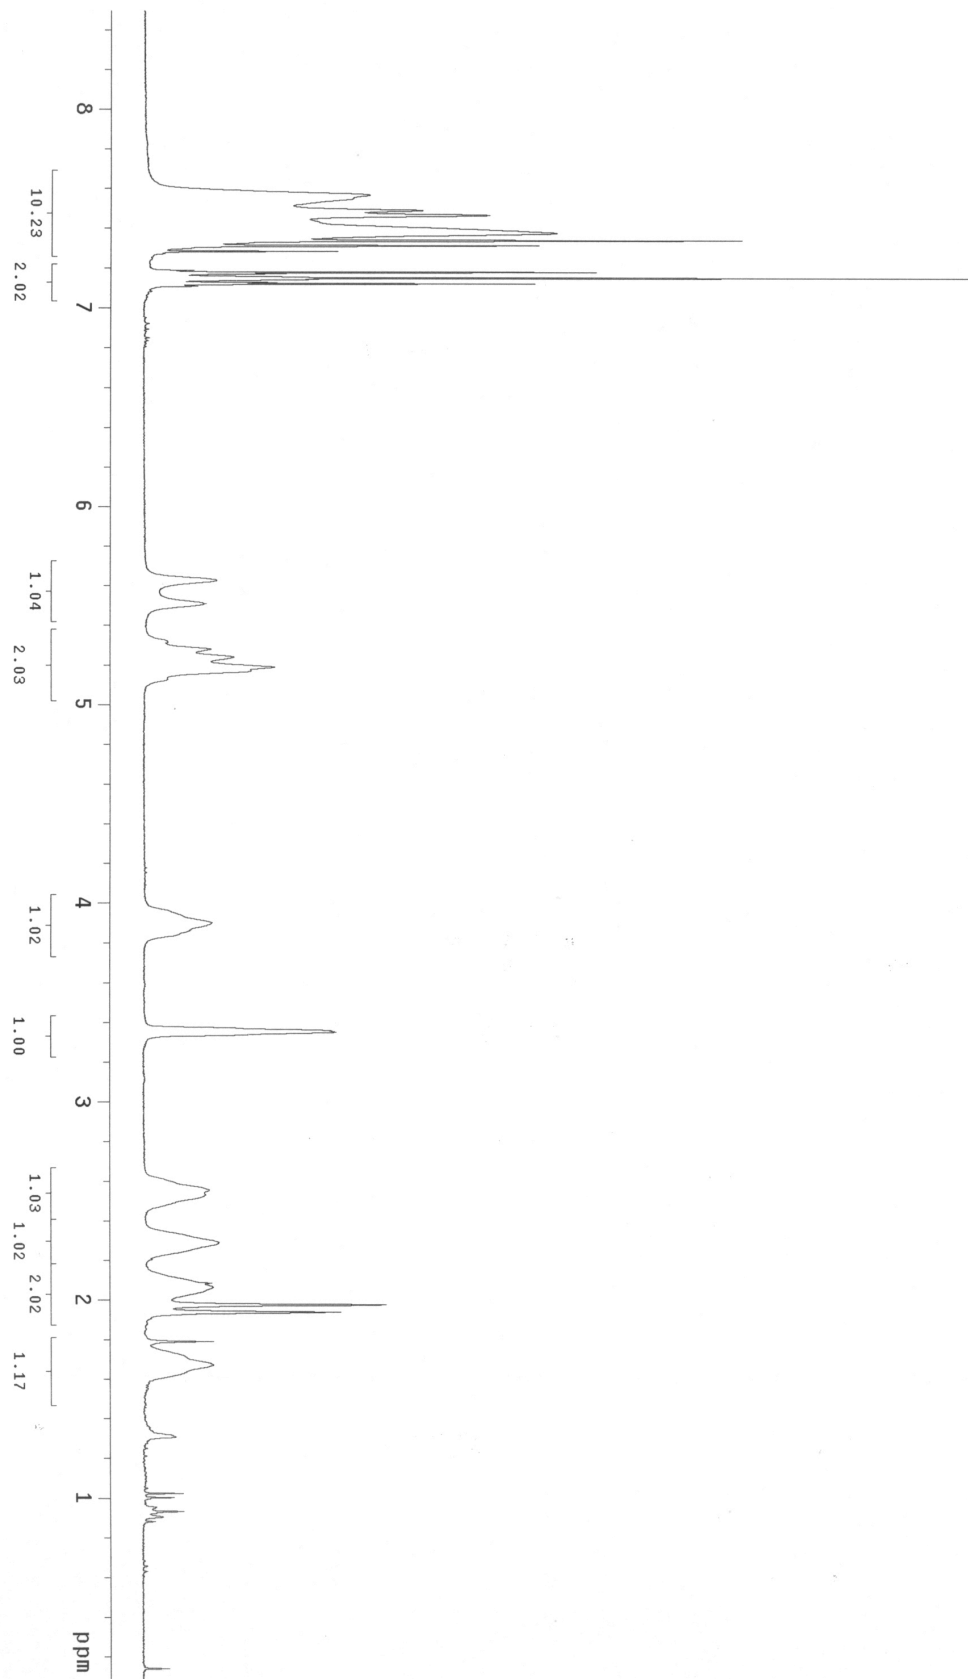

13C OBSERVE

exptl std13c

SAMPLE May 28 2009 DEC. & VT 300.141  
 SOLVENT GDC13 dn H1  
 FILE exp dppw 40  
 ACQUISITION dof 4000.0  
 sftq 75.478 dm YYY  
 ln G13 dmm W  
 at 1.777 dmf 8000  
 np 64000 dseq  
 SW 18009.9 dres 1.0  
 fb 10000 homo n  
 bs 10 PROCESSING 1.00  
 tpwr 50 lb wtfile  
 pw 6.0 wtfproc ft  
 dl 2.000 proc fn not used  
 tof 586.5 math f  
 nt 3000  
 ct 580  
 alock n werr  
 gain 60 wbs  
 flags n wnt

11 n  
 in n  
 dp n  
 hs nm  
 DISPLAY  
 sp 1296.8  
 wp 12408.0  
 vs 161  
 sc 0  
 wc 250  
 hzmm 49.63  
 ls 500.00  
 rfl 853.9  
 rfp 0  
 th 8  
 ins 100.000  
 nm

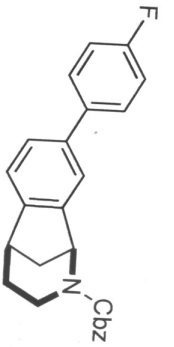

20(2.10)

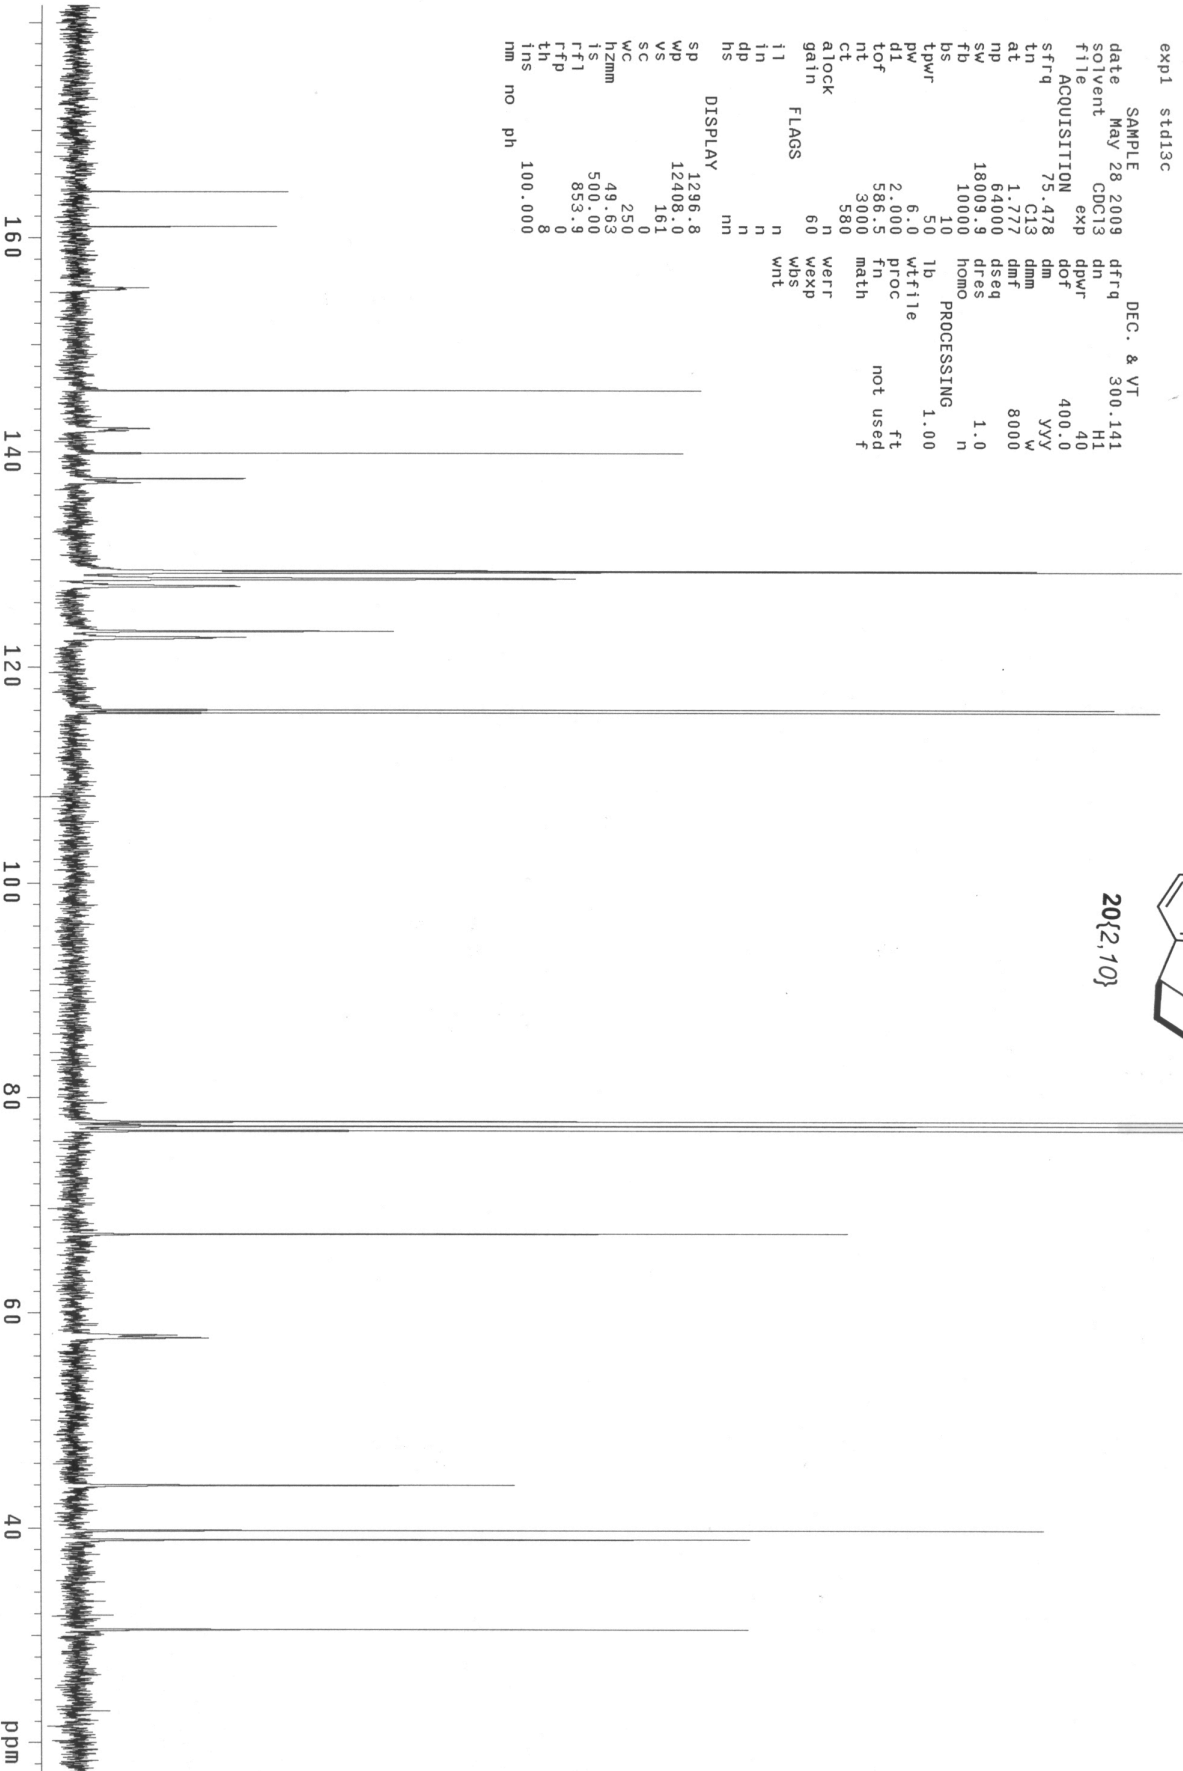

Data File L:\06-12\SAHN\130612-JJS-1-1281-19035.D  
Sample Name: jjs-1-128

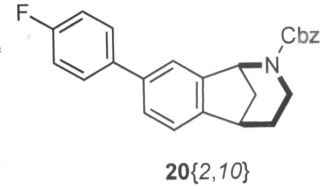

=====  
Acq. Operator : sahn@mail.utexas.edu  
Acq. Instrument : LCMS Location : Vial 44  
Injection Date : 6/13/2012 8:38:34 PM Inj Volume : 1.0 µl  
Acq. Method : C:\CHEM32\1\METHODS\SP\_NIH.M  
Last changed : 6/13/2012 8:38:19 PM by sahn@mail.utexas.edu  
(modified after loading)  
Analysis Method : C:\CHEM32\1\METHODS\DEEF\_LC.M  
Last changed : 9/28/2011 3:20:36 PM  
Sample Info : Easy-Access Method: 'SP\_NIH'

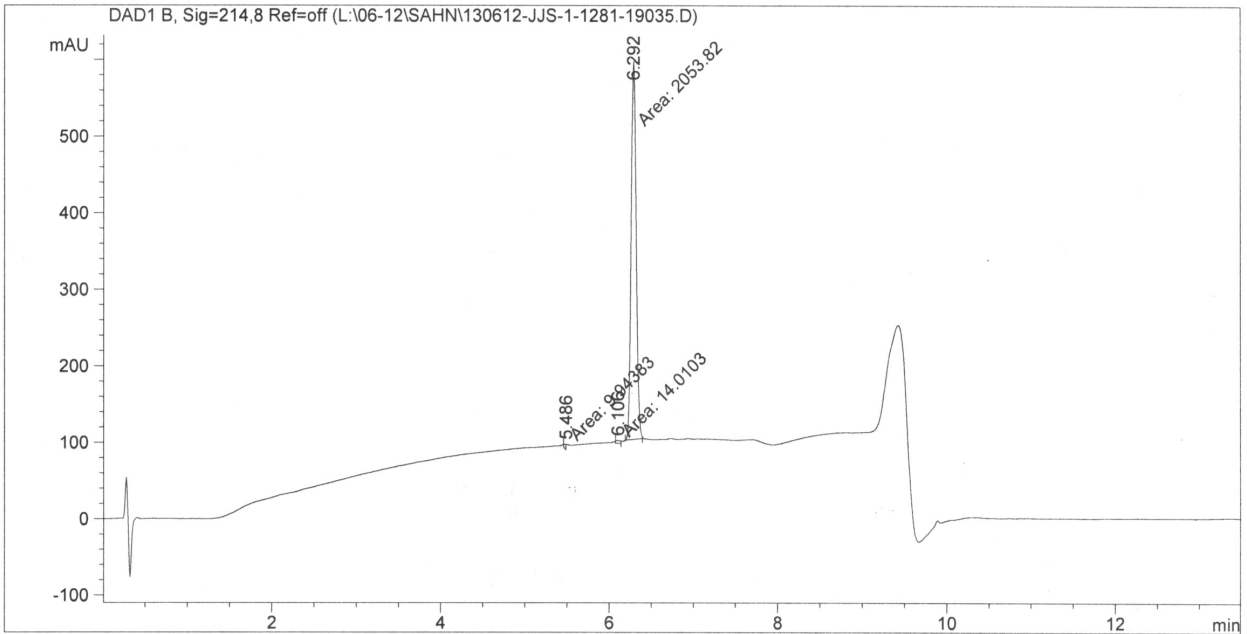

=====  
Area Percent Report  
=====

Sorted By : Signal  
Multiplier: : 1.0000  
Dilution: : 1.0000  
Use Multiplier & Dilution Factor with ISTDs

Signal 1: DAD1 B, Sig=214,8 Ref=off

| Peak # | RetTime [min] | Type | Width [min] | Area [mAU*s] | Height [mAU] | Area %  |
|--------|---------------|------|-------------|--------------|--------------|---------|
| 1      | 5.486         | MM   | 0.0236      | 9.94383      | 7.01881      | 0.4786  |
| 2      | 6.106         | MM   | 0.0586      | 14.01030     | 3.98387      | 0.6743  |
| 3      | 6.292         | MM   | 0.0690      | 2053.81860   | 496.00705    | 98.8471 |

Totals : 2077.77274 507.00973

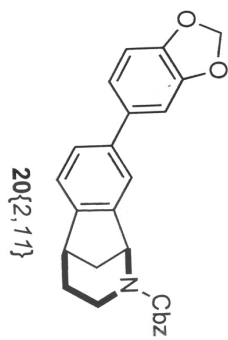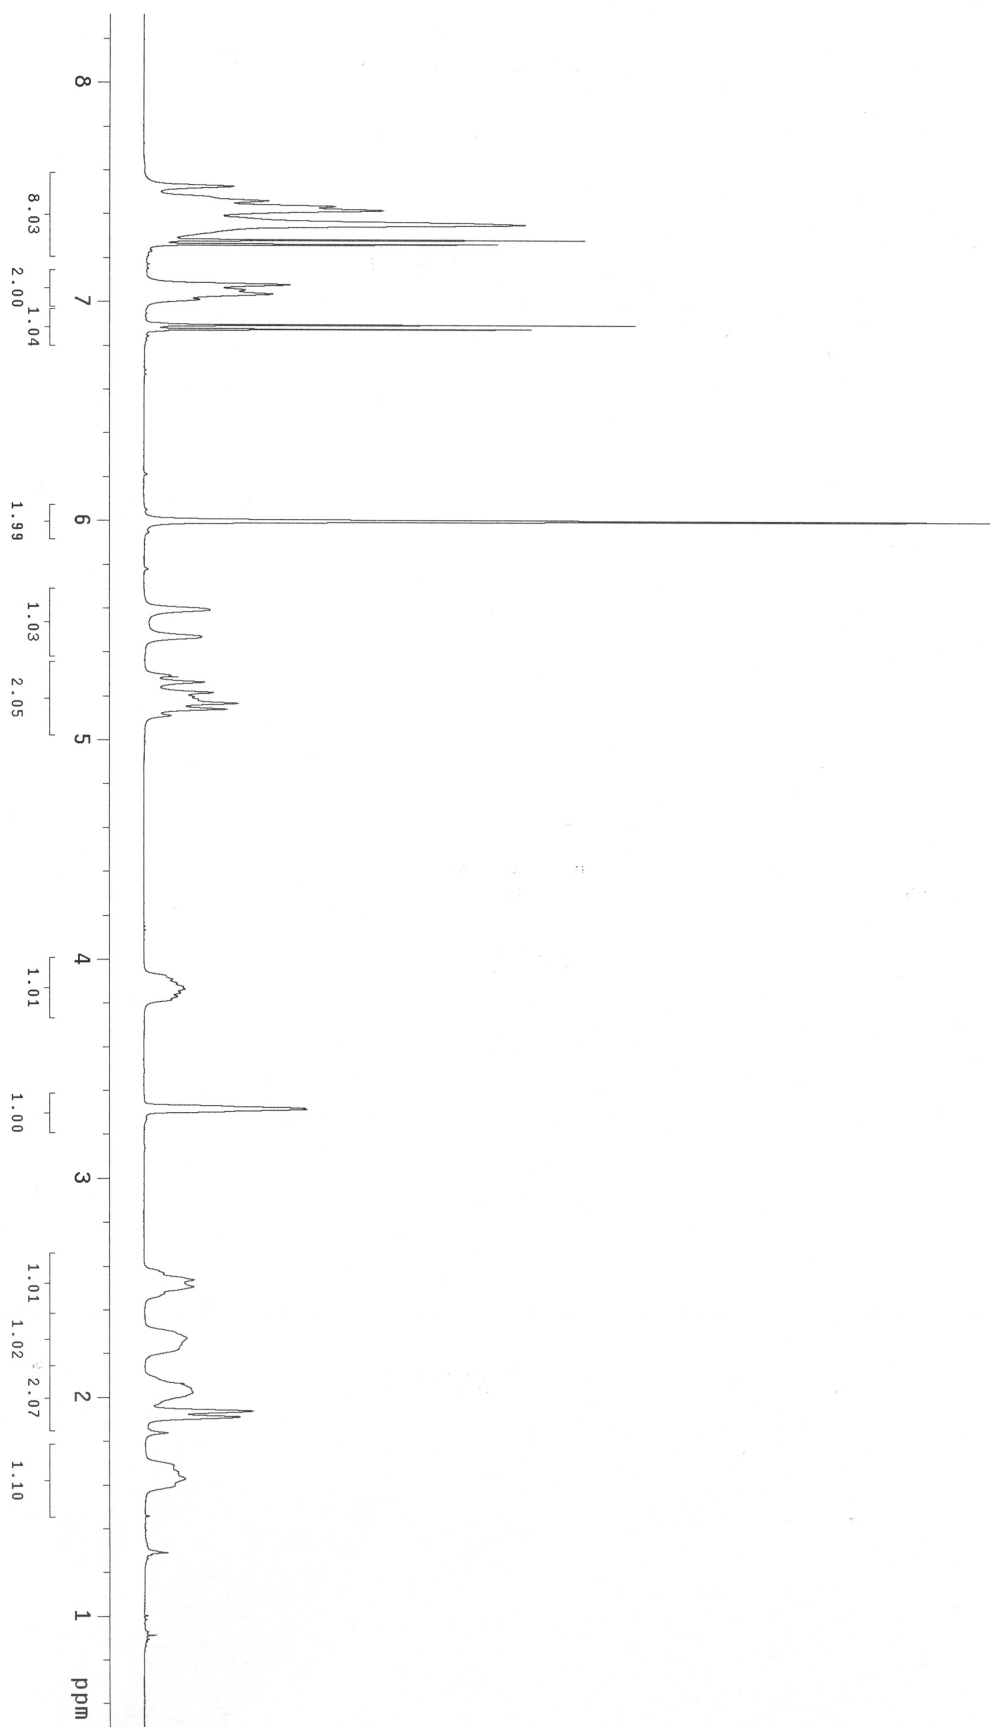

13C OBSERVE

exptl std13c

SAMPLE DEC. & VT  
 date May 27 2009 dfrq 400.269  
 solvent CDC13 dn H1  
 file exp dpwr 38  
 ACQUISITION dof 0  
 sfrq 100.658 dm YYY  
 tn C13 dmm W  
 at 1.280 dmf 9300  
 np 64484 lb PROCESSING  
 sw 25188.9 wifile 1.00  
 bs 13800 10 proc not used  
 tpwr 60 fn  
 pw 3.0 werr  
 dl 2.000 wexp  
 tof 1539.5 wbs  
 nt 3000 wnt  
 ct 810

alock not used  
 gain n  
 fl n  
 in n  
 dp y

DISPLAY

sp 820.7  
 wp 15833.0  
 vs 198  
 sc 0  
 wc 250  
 hzmm 63.33  
 is 500.00  
 rffl 1527.0  
 rffp 0  
 th 7  
 ins 100.000  
 nm cdc ph

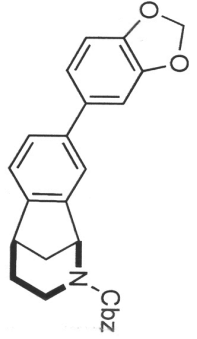

20{2,11}

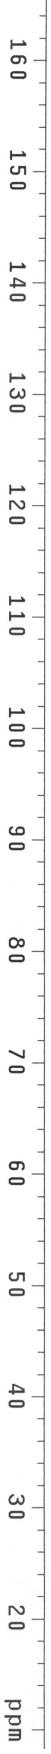

Data File L:\06-12\SAHN\130612-JJS-1-1251-19034.D  
Sample Name: jjs-1-125

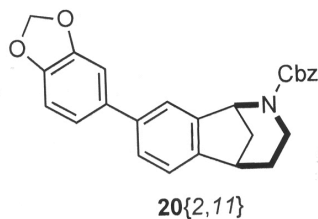

=====  
Acq. Operator : sahn@mail.utexas.edu  
Acq. Instrument : LCMS  
Injection Date : 6/13/2012 8:23:32 PM  
  
Acq. Method : C:\CHEM32\1\METHODS\SP\_NIH.M  
Last changed : 6/13/2012 8:23:18 PM by sahn@mail.utexas.edu  
(modified after loading)  
Analysis Method : C:\CHEM32\1\METHODS\DEEF\_LC.M  
Last changed : 9/28/2011 3:20:36 PM  
Sample Info : Easy-Access Method: 'SP\_NIH'

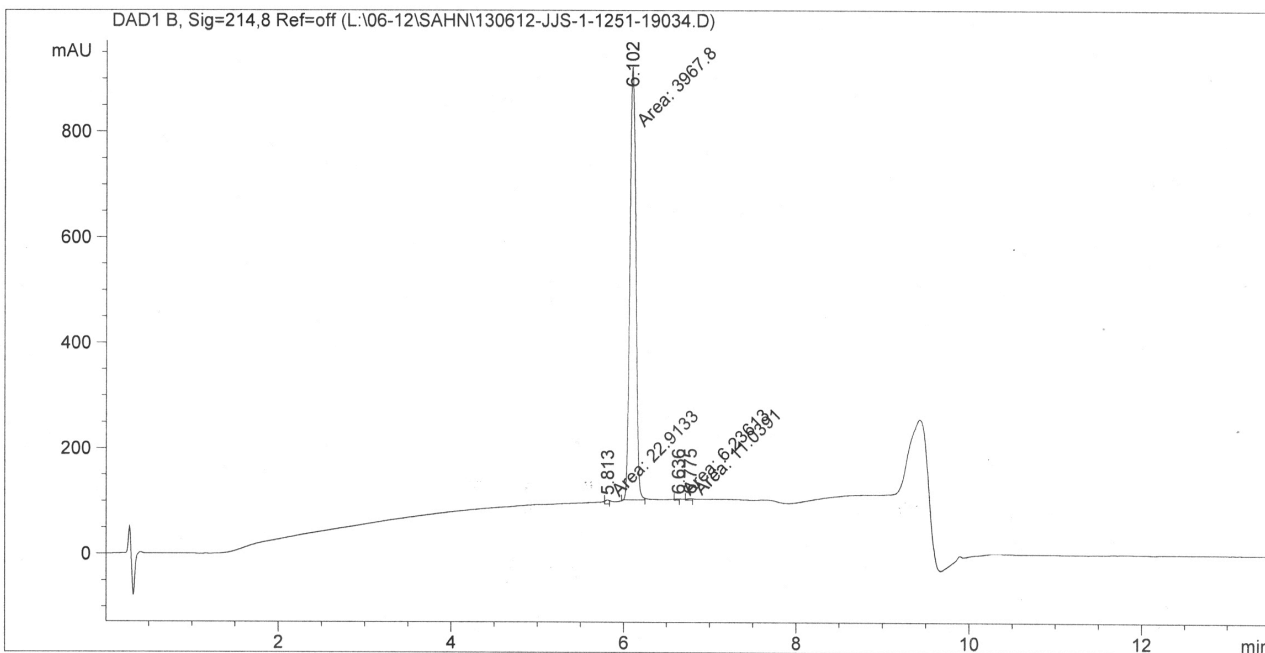

=====  
Area Percent Report  
=====

Sorted By : Signal  
Multiplier: : 1.0000  
Dilution: : 1.0000  
Use Multiplier & Dilution Factor with ISTDs

Signal 1: DAD1 B, Sig=214,8 Ref=off

| Peak # | RetTime [min] | Type | Width [min] | Area [mAU*s] | Height [mAU] | Area %  |
|--------|---------------|------|-------------|--------------|--------------|---------|
| 1      | 5.813         | MM   | 0.0534      | 22.91327     | 7.15006      | 0.5717  |
| 2      | 6.102         | MM   | 0.0804      | 3967.79663   | 822.65356    | 98.9973 |
| 3      | 6.636         | MM   | 0.0487      | 6.23613      | 2.13406      | 0.1556  |
| 4      | 6.775         | MM   | 0.0690      | 11.03907     | 2.66528      | 0.2754  |

Totals : 4007.98510 834.60297

STANDARD 1H OBSERVE

expt1 std1h

|             |            |
|-------------|------------|
| SAMPLE      | DEC. & VI  |
| date        | Oct 8 2009 |
| file        | 6 CDC13    |
| solvent     | exp        |
| ACQUISITION | dmf        |
| file        | dm         |
| sfrq        | 400.269    |
| tn          | H1         |
| at          | 2.856      |
| nd          | 32000      |
| sw          | 5602.2     |
| fb          | not used   |
| bs          | not used   |
| tpwr        | 58         |
| pw          | 2.0        |
| d1          | 2.000      |
| tof         | 169.9      |
| nt          | 70         |
| ct          | 22         |
| alock       | n          |
| gain        | not used   |
| FLAGS       | n          |
| il          | n          |
| in          | n          |
| dp          | y          |

|         |        |
|---------|--------|
| DISPLAY | 154.6  |
| sp      | 3070.2 |
| wp      | 147    |
| vs      | 0      |
| sc      | 250    |
| wc      | 12.28  |
| hzmm    | 301.56 |
| is      | 814.1  |
| rfl     | 0      |
| rffp    | 20     |
| th      | 1.000  |
| ins     | nm     |
| cdc     | ph     |

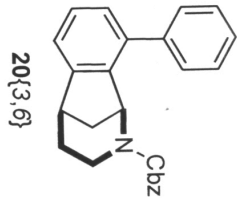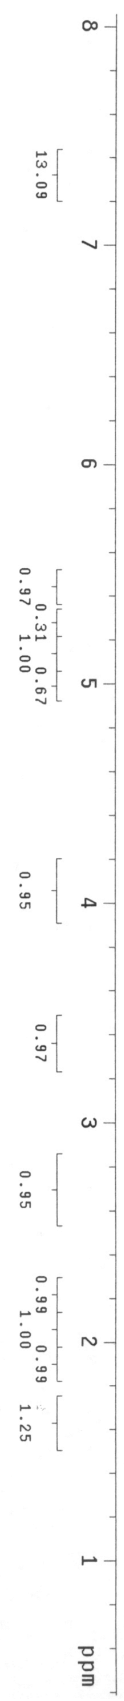



13C OBSERVE

exptl std13c

|             |         |            |          |
|-------------|---------|------------|----------|
| SAMPLE      | 6 2009  | DEC. & VT  | 300.141  |
| date        | Oct     | dfreq      | H1       |
| solvent     | CDCl3   | dn         | 40       |
| file        | exp     | dpwr       | 400.0    |
| ACQUISITION | exp     | dof        | 400.0    |
| sfrq        | 75.478  | dm         | yyy      |
| tn          | C13     | dmm        | y        |
| at          | 1.777   | dmf        | 8000     |
| nd          | 64000   | dseq       |          |
| sw          | 18009.9 | dres       | 1.0      |
| td          | 10000   | homo       | n        |
| DS          | 6       | PROCESSING |          |
| tpwr        | 50      | lb         | 1.00     |
| pw          | 6.0     | wffile     |          |
| di          | 2.000   | proc       | ft       |
| tof         | 586.5   | fn         | not used |
| nt          | 1000    | math       | f        |
| ct          | 636     |            |          |
| atlock      | n       | werr       |          |
| gain        | 60      | wexp       |          |
| FLAGS       | n       | wbs        |          |
| 11          | n       | wnt        |          |
| in          | n       |            |          |
| dp          | n       |            |          |
| hs          | nm      |            |          |

  

|         |         |
|---------|---------|
| DISPLAY | -853.9  |
| SP      | 18009.9 |
| WP      | 167     |
| VS      | 0       |
| SC      | 250     |
| WC      | 72.04   |
| h2mm    | 500.00  |
| is      | 853.9   |
| rfl     | 0       |
| ffl     | 20      |
| th      | 100.000 |
| ins     |         |
| nm      |         |

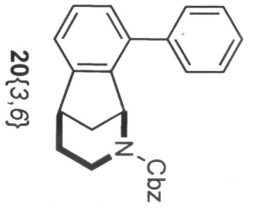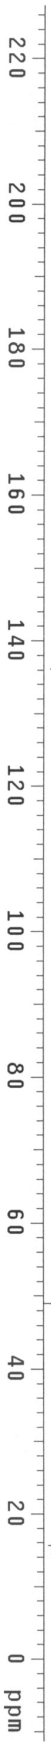

Data File L:\06-12\SAHN\140612-JJS-1-2481-19052.D  
Sample Name: jjs-1-248

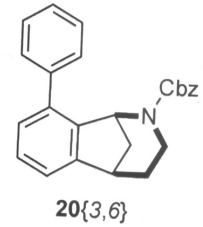

=====  
Acq. Operator : sahn@mail.utexas.edu  
Acq. Instrument : LCMS Location : Vial 8  
Injection Date : 6/14/2012 11:18:40 AM Inj Volume : 1.0 µl  
Acq. Method : C:\CHEM32\1\METHODS\SP NIH.M  
Last changed : 6/14/2012 11:18:25 AM by sahn@mail.utexas.edu  
(modified after loading)  
Analysis Method : C:\CHEM32\1\METHODS\DEEF\_LC.M  
Last changed : 9/28/2011 3:20:36 PM  
Sample Info : Easy-Access Method: 'SP NIH'  
=====

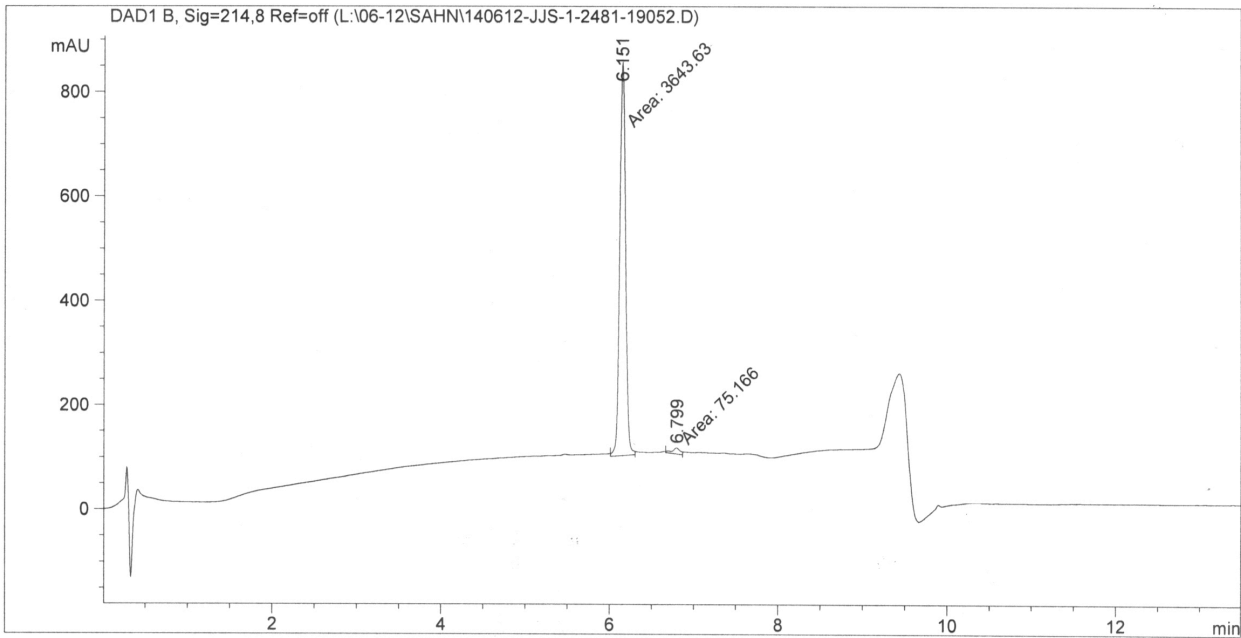

=====  
Area Percent Report  
=====

Sorted By : Signal  
Multiplier: : 1.0000  
Dilution: : 1.0000  
Use Multiplier & Dilution Factor with ISTDs

Signal 1: DAD1 B, Sig=214,8 Ref=off

| Peak # | RetTime [min] | Type | Width [min] | Area [mAU*s] | Height [mAU] | Area %  |
|--------|---------------|------|-------------|--------------|--------------|---------|
| 1      | 6.151         | MM   | 0.0804      | 3643.62866   | 755.43994    | 97.9788 |
| 2      | 6.799         | MM   | 0.1112      | 75.16598     | 11.26356     | 2.0212  |

Totals : 3718.79464 766.70350

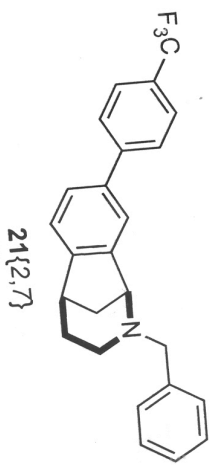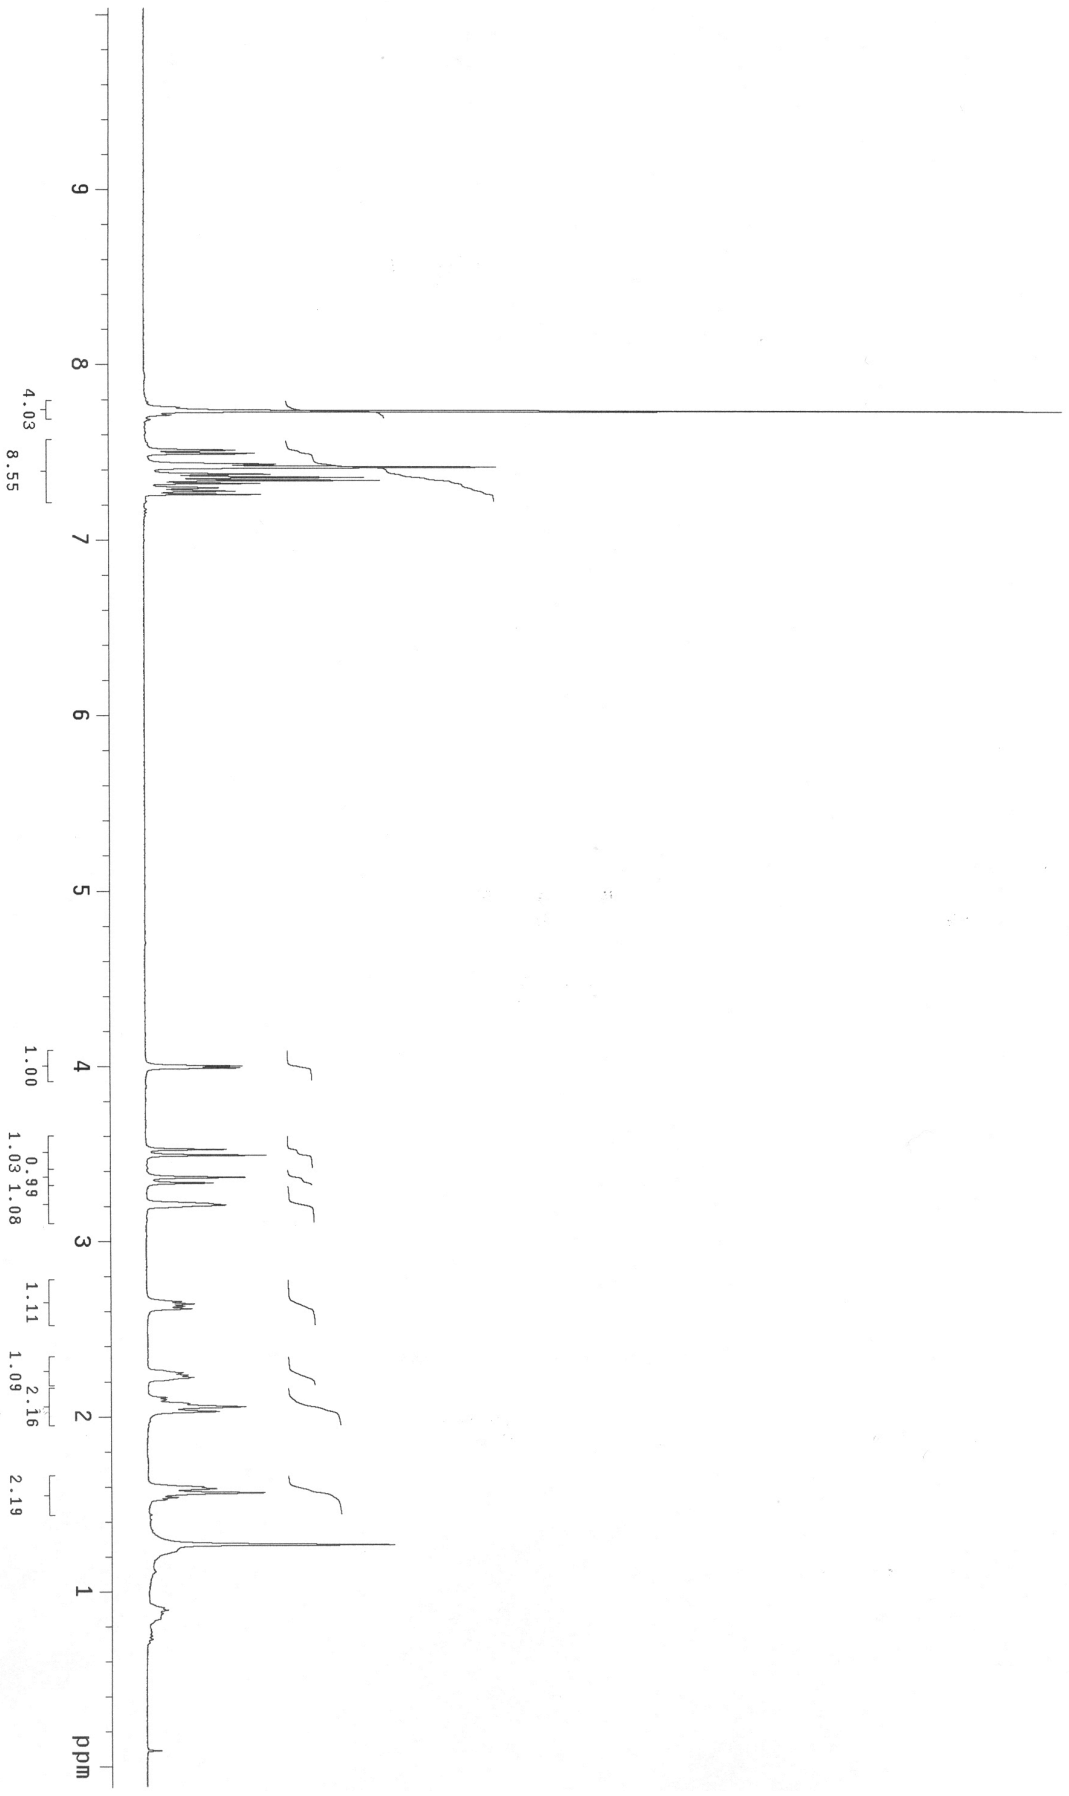

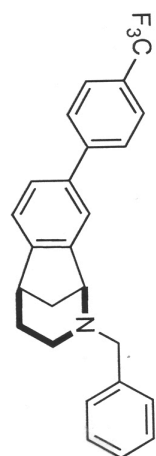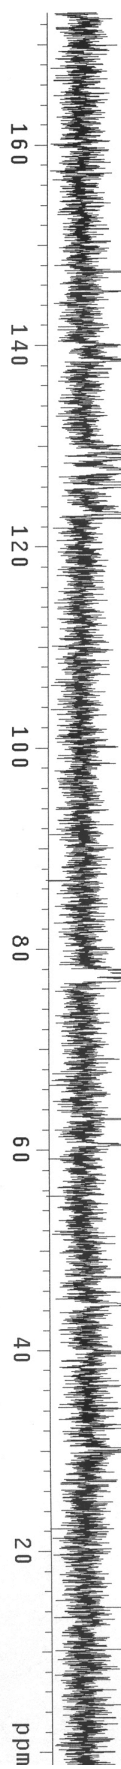

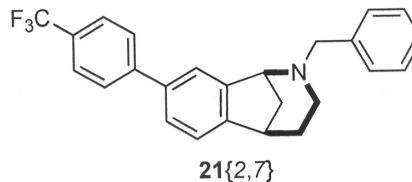

```

=====
Acq. Operator   : sahn@mail.utexas.edu
Acq. Instrument : LCMS
Injection Date  : 2/7/2012 3:50:35 PM

Acq. Method     : C:\CHEM32\1\METHODS\SP NIH.M
Last changed    : 2/7/2012 3:50:20 PM by sahn@mail.utexas.edu
                  (modified after loading)

Analysis Method : C:\CHEM32\1\METHODS\DEEF_LC.M
Last changed    : 9/28/2011 3:20:36 PM

Sample Info     : Easy-Access Method: 'SP NIH'
  
```

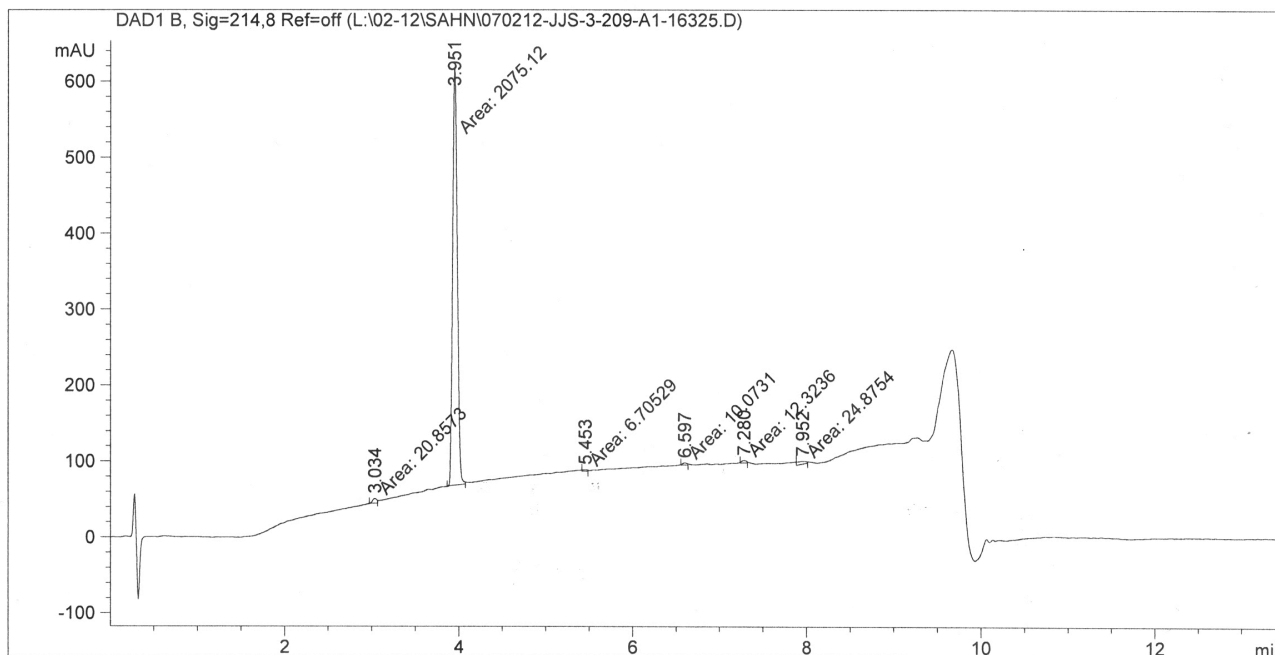

=====  
 Area Percent Report  
 =====

```

Sorted By          Signal
Multiplier:        :      1.0000
Dilution:          :      1.0000
Use Multiplier & Dilution Factor with ISTDs
  
```

Signal 1: DAD1 B, Sig=214,8 Ref=off

| Peak # | RetTime [min] | Type | Width [min] | Area [mAU*s] | Height [mAU] | Area %  |
|--------|---------------|------|-------------|--------------|--------------|---------|
| 1      | 3.034         | MM   | 0.0545      | 20.85730     | 6.37260      | 0.9701  |
| 2      | 3.951         | MM   | 0.0623      | 2075.12036   | 555.51154    | 96.5192 |
| 3      | 5.453         | MM   | 0.0610      | 6.70529      | 1.83278      | 0.3119  |
| 4      | 6.597         | MM   | 0.0593      | 10.07314     | 2.83326      | 0.4685  |
| 5      | 7.280         | MM   | 0.0615      | 12.32358     | 3.33878      | 0.5732  |
| 6      | 7.952         | MM   | 0.0939      | 24.87543     | 3.55356      | 1.1570  |

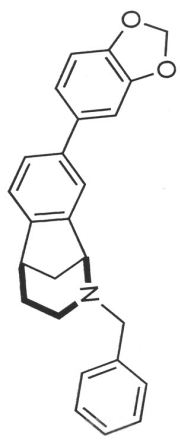

24(2,11)

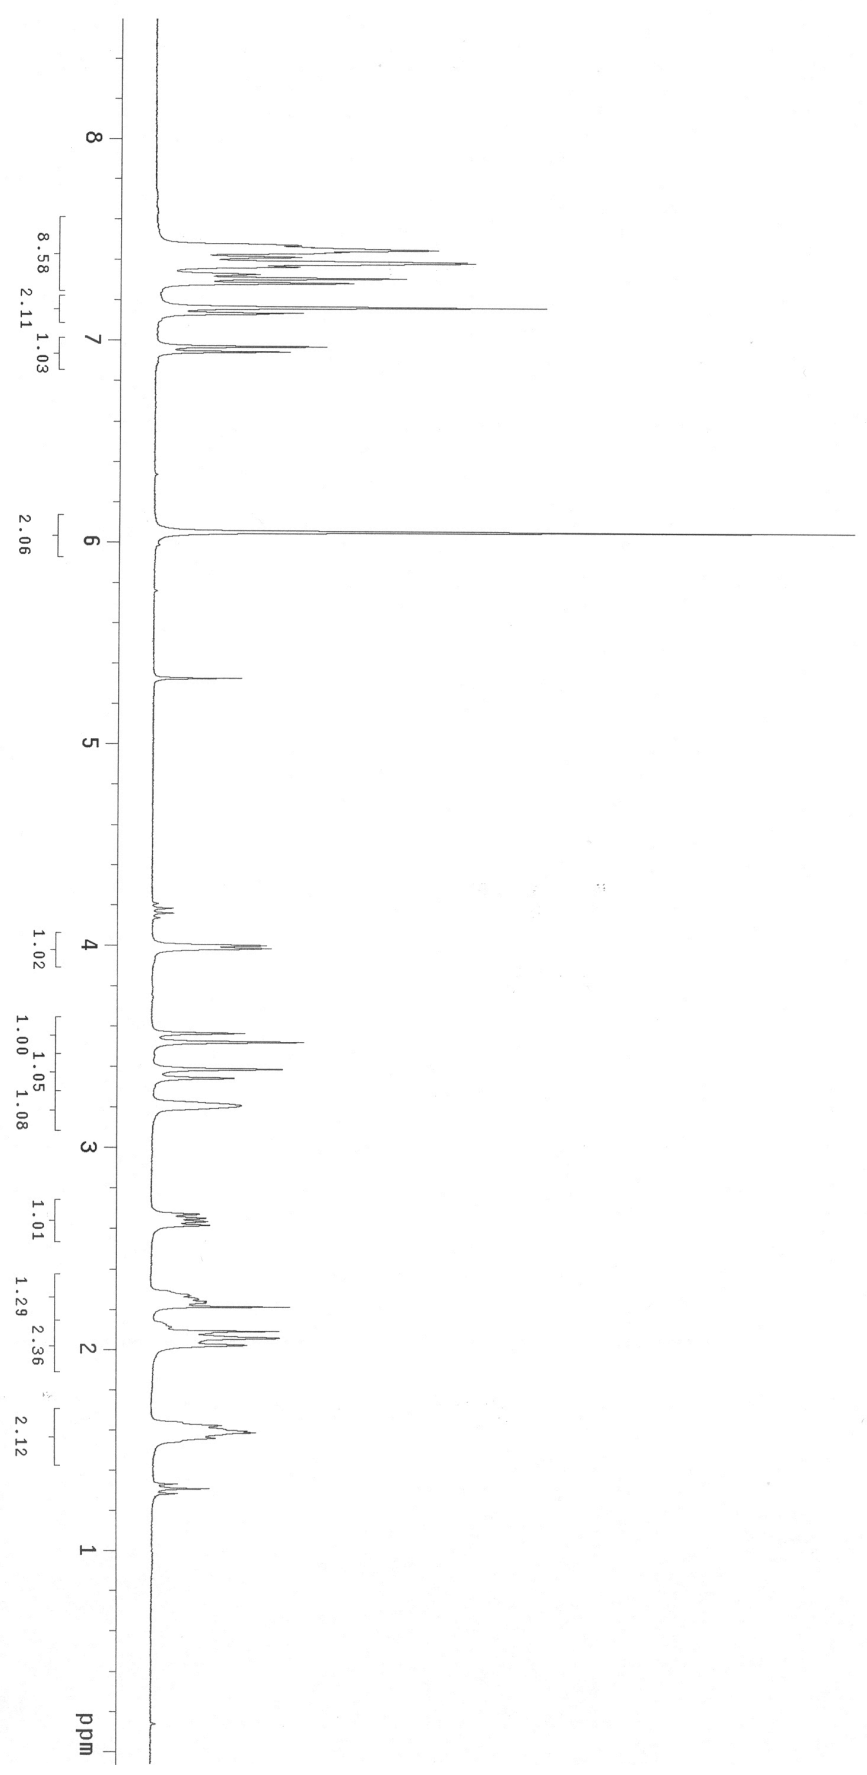

13C OBSERVE

exp1 std13c

| SAMPLE      |            | DEC. & VT  |          |
|-------------|------------|------------|----------|
| date        | Jun 5 2009 | dfrq       | 300.141  |
| solvent     | CDCl3      | dn         | H1       |
| file        | exp        | dpwr       | 40       |
| ACQUISITION |            | doF        | 400.0    |
| sfrq        | 75.478     | dm         | yyy      |
| tn          | C13        | dmm        | w        |
| at          | 1.777      | dmt        | 8000     |
| np          | 64000      | dseq       |          |
| sw          | 18009.9    | dres       | 1.0      |
| fb          | 10000      | homo       | n        |
| bs          | 16         | PROCESSING |          |
| tpwr        | 50         | lp         | 1.00     |
| pw          | 6.0        | wf         |          |
| d1          | 2.000      | proc       | ft       |
| tof         | 588.5      | tn         | not used |
| ht          | 1000       | math       | f        |
| ct          | 448        |            |          |
| atlock      | n          | werr       |          |
| gain        | 60         | wexp       |          |
| whs         | n          | wbs        |          |
| il          | n          | wht        |          |
| in          | n          |            |          |
| dp          | n          |            |          |
| hs          | nn         |            |          |
| DISPLAY     |            |            |          |
| sp          | -853.9     |            |          |
| wp          | 18009.9    |            |          |
| vs          | 79         |            |          |
| sc          | 0          |            |          |
| wc          | 250        |            |          |
| h2mm        | 72.04      |            |          |
| is          | 500.00     |            |          |
| rfl         | 853.9      |            |          |
| rflp        | 0          |            |          |
| th          | 20         |            |          |
| ins         | 100.000    |            |          |
| nm          | no         |            |          |

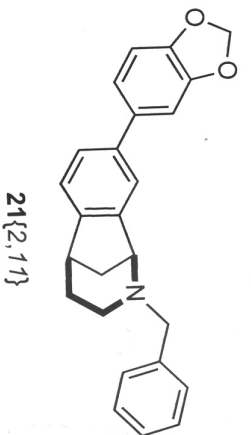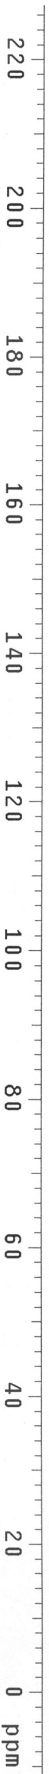

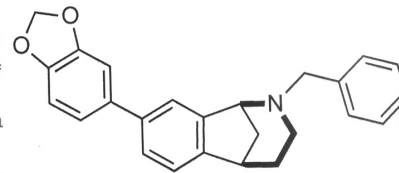

21{2,11}

=====  
Acq. Operator : sahn@mail.utexas.edu  
Acq. Instrument : LCMS  
Injection Date : 6/13/2012 8:53:34 PM  
Acq. Method : C:\CHEM32\1\METHODS\SP NIH.M  
Last changed : 6/13/2012 8:53:19 PM by sahn@mail.utexas  
(modified after loading)  
Analysis Method : C:\CHEM32\1\METHODS\DEEF\_LC.M  
Last changed : 9/28/2011 3:20:36 PM  
Sample Info : Easy-Access Method: 'SP NIH'

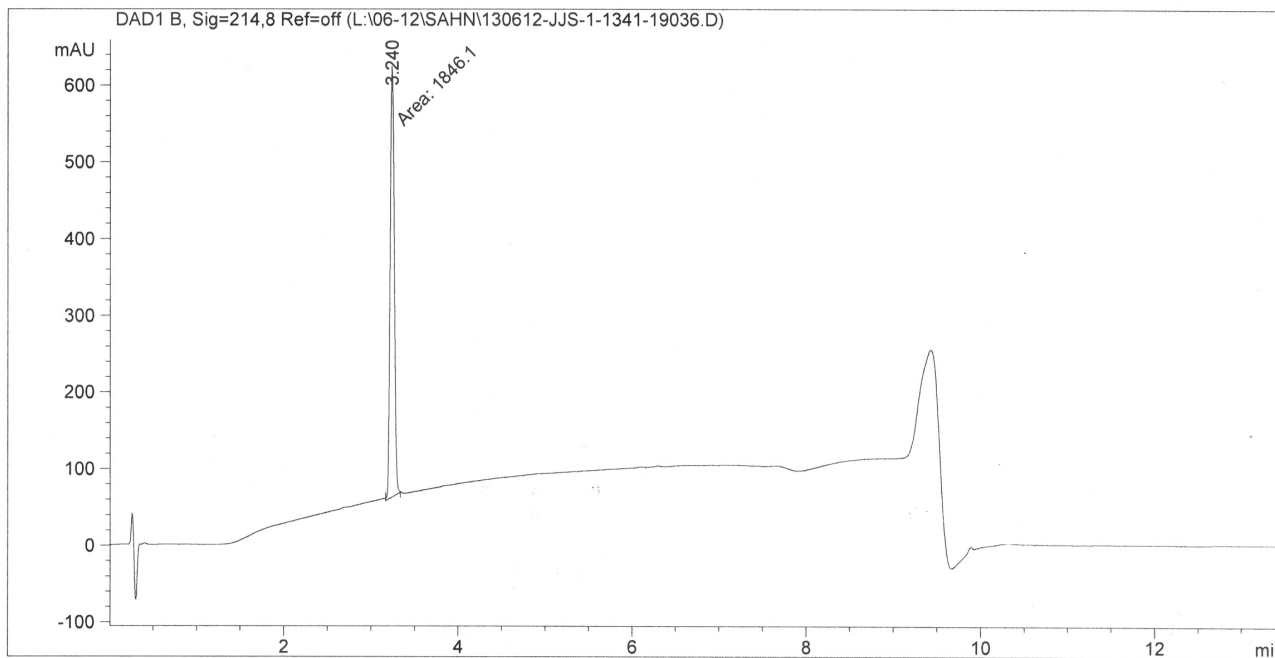

=====  
Area Percent Report  
=====

Sorted By : Signal  
Multiplier: : 1.0000  
Dilution: : 1.0000  
Use Multiplier & Dilution Factor with ISTDs

Signal 1: DAD1 B, Sig=214,8 Ref=off

| Peak # | RetTime [min] | Type | Width [min] | Area [mAU*s] | Height [mAU] | Area %   |
|--------|---------------|------|-------------|--------------|--------------|----------|
| 1      | 3.240         | MM   | 0.0542      | 1846.09924   | 567.89185    | 100.0000 |

Totals : 1846.09924 567.89185



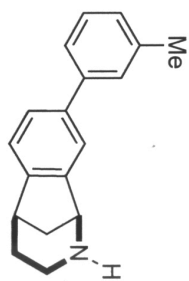

23 (2.9)

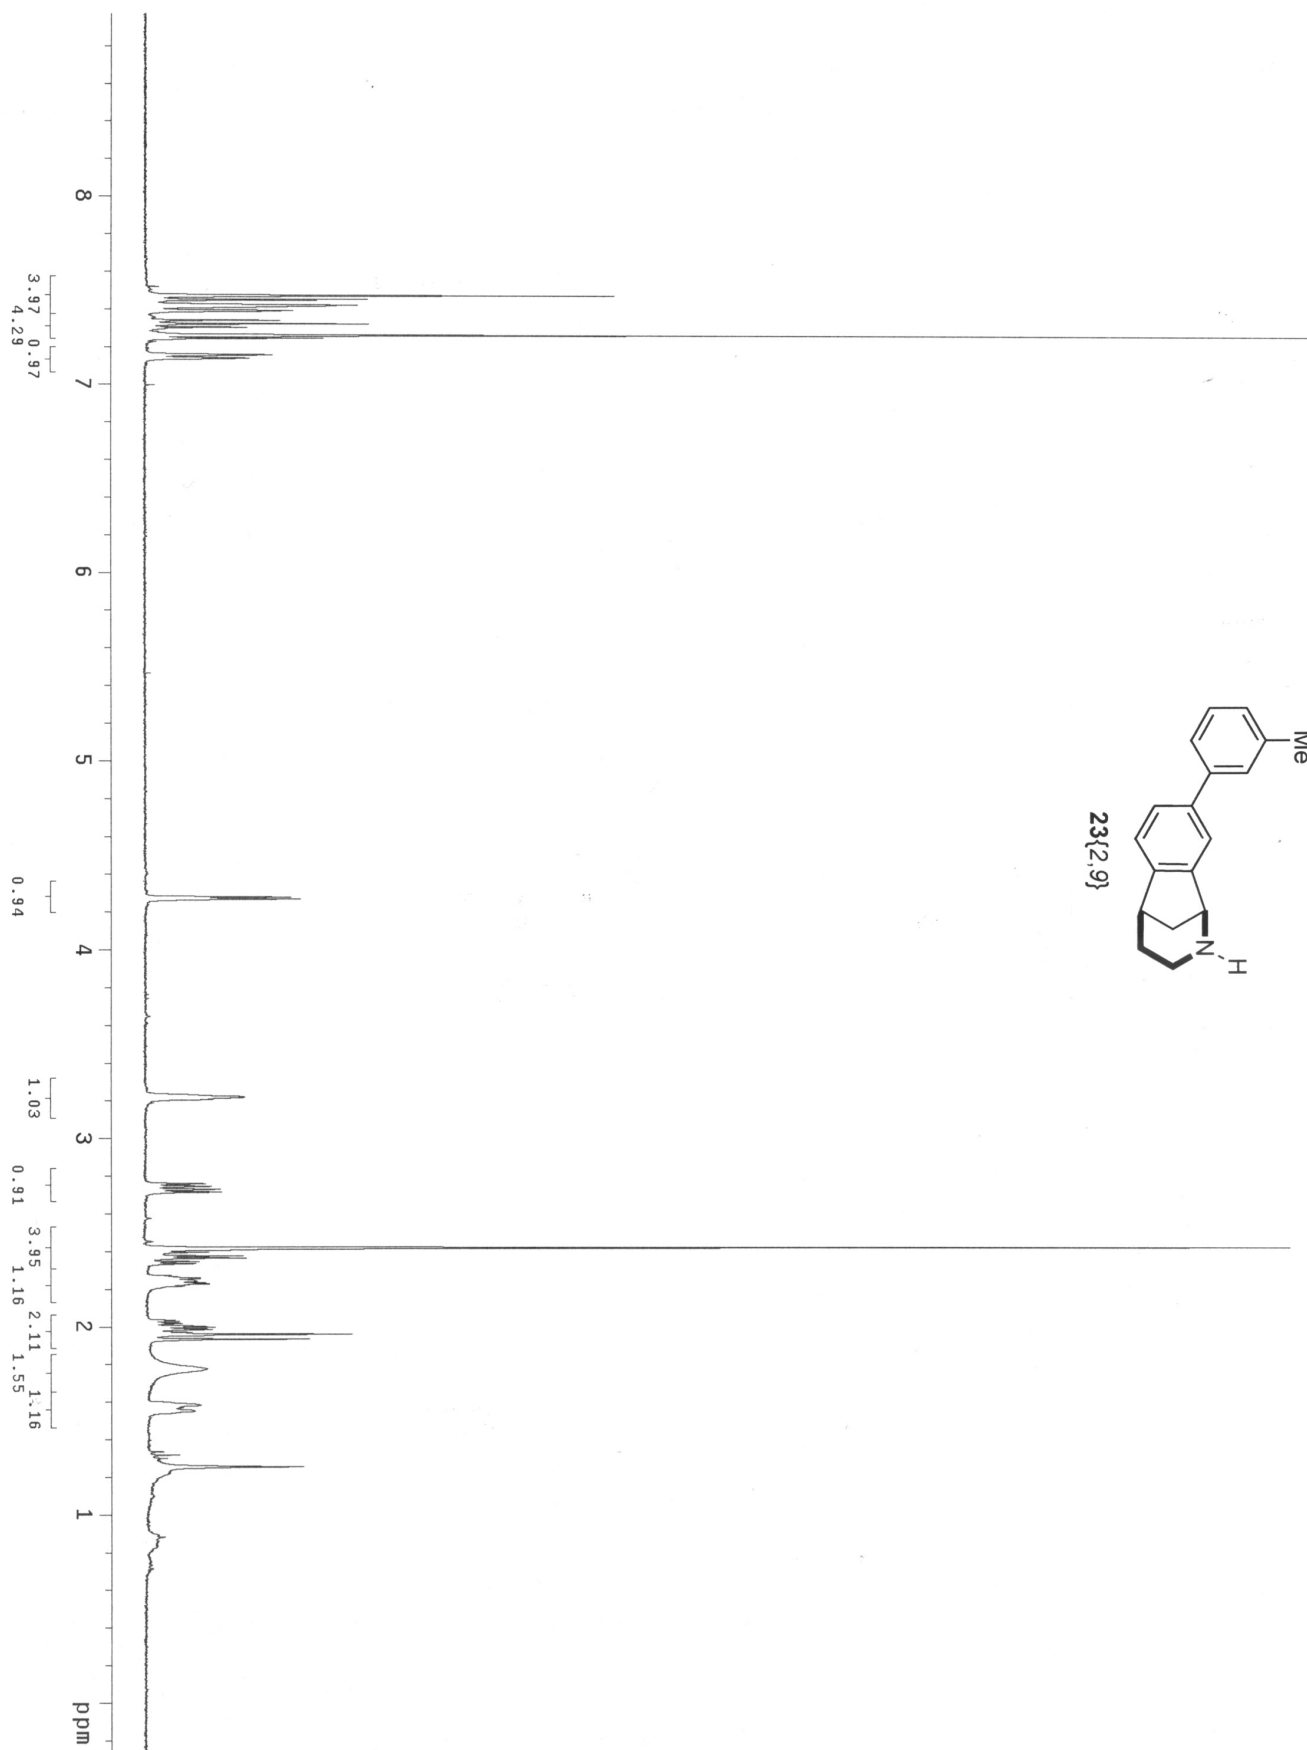

500 MHz nmr-0

JJS-1-184

exp4 Carbon

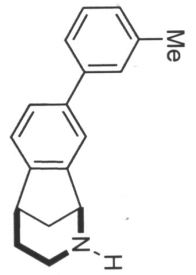

23{2.9}

| SAMPLE      |             | SPECIAL    |          |
|-------------|-------------|------------|----------|
| date        | Nov 17 2010 | temp       | 27.0     |
| solvent     | cdcl3       | gain       | 40       |
| f1file      | exp         | spn        | 20       |
| ACQUISITION | exp         | hst        | 0.008    |
| sw          | 32879.7     | pw90       | 9.500    |
| at          | 1.958       | alfa       | 10.000   |
| np          | 128000      | FLAGS      |          |
| fb          | 18000       | i1         | n        |
| bs          | 16          | in         | n        |
| dl          | 2.000       | dp         | y        |
| nt          | 13000       | hs         | nm       |
| ct          | 13000       | PROCESSING |          |
| tn          | TRANSMITTER | lb         | 1.00     |
| sfreq       | 125.705     | fn         | not used |
| tof         | 1883.9      | sp         | DISPLAY  |
| tpwr        | 53          | wp         | -628.5   |
| pw          | 3.163       | rfl        | 25766.4  |
| DECOUPLER   | H1          | rffl       | 12221.5  |
| dn          | 0           | rffp       | 9678.2   |
| dof         | 0           | tp         | -110.4   |
| dmm         | YYY         | PLOT       | -206.4   |
| dmm         | W           | WC         | 250      |
| dpwr        | 37          | SC         | 0        |
| dmf         | 10582       | VS         | 44203    |
|             |             | th         | 5        |
|             |             | ai         | cdc ph   |

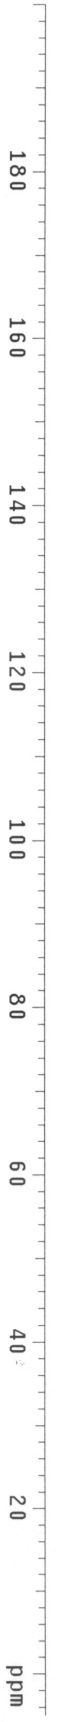

Data File L:\06-12\SAHN\140612-JJS-1-1941-19049.D  
Sample Name: jjs-1-194

=====  
Acq. Operator : sahn@mail.utexas.edu  
Acq. Instrument : LCMS Location : Vial 5  
Injection Date : 6/14/2012 10:28:59 AM Inj Volume : 1.0 µl  
Acq. Method : C:\CHEM32\1\METHODS\SP NIH.M  
Last changed : 6/14/2012 10:28:44 AM by sahn@mail.utexas.edu  
(modified after loading)  
Analysis Method : C:\CHEM32\1\METHODS\DEEF\_LC.M  
Last changed : 9/28/2011 3:20:36 PM  
Sample Info : Easy-Access Method: 'SP NIH'

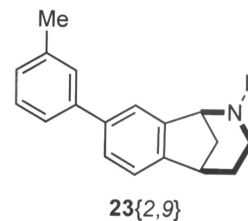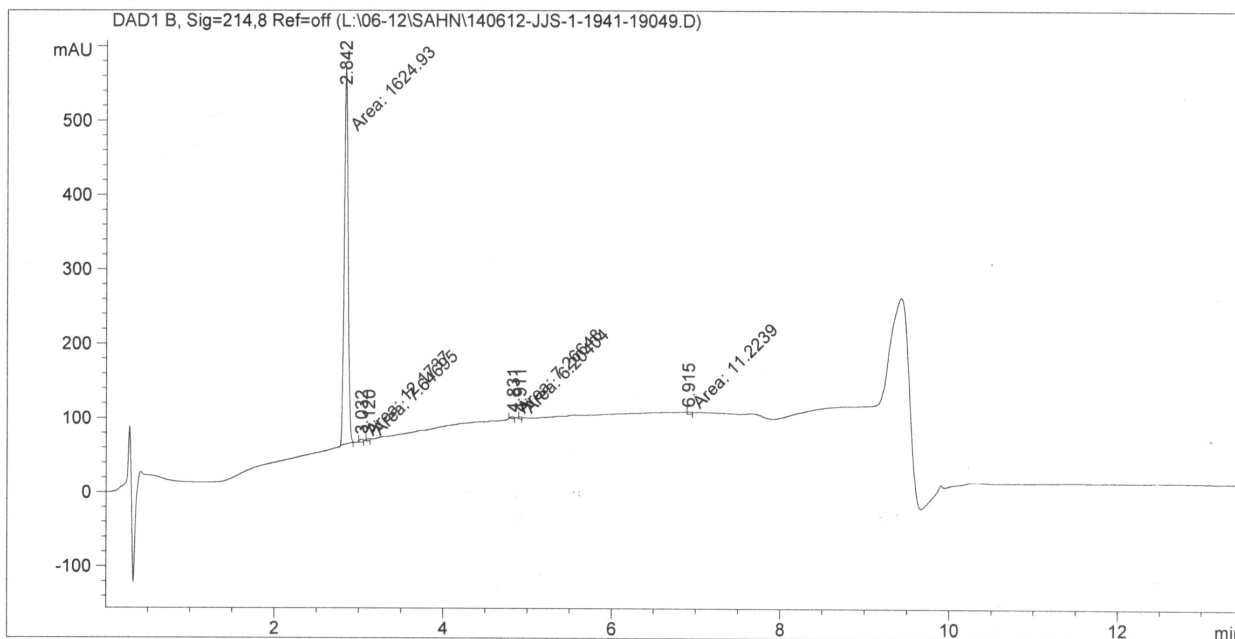

=====  
Area Percent Report  
=====

Sorted By : Signal  
Multiplier: : 1.0000  
Dilution: : 1.0000  
Use Multiplier & Dilution Factor with ISTDs

Signal 1: DAD1 B, Sig=214,8 Ref=off

| Peak # | RetTime [min] | Type | Width [min] | Area [mAU*s] | Height [mAU] | Area %  |
|--------|---------------|------|-------------|--------------|--------------|---------|
| 1      | 2.842         | MM   | 0.0528      | 1624.93042   | 512.66553    | 97.3335 |
| 2      | 3.032         | MM   | 0.0465      | 12.17374     | 4.36758      | 0.7292  |
| 3      | 3.120         | MM   | 0.0394      | 7.64695      | 3.23548      | 0.4581  |
| 4      | 4.831         | MM   | 0.0454      | 7.26648      | 2.66598      | 0.4353  |
| 5      | 4.911         | MM   | 0.0327      | 6.20404      | 3.16062      | 0.3716  |
| 6      | 6.915         | MM   | 0.0615      | 11.22390     | 3.04189      | 0.6723  |

Instrument 1 6/14/2012 12:17:26 PM

Page 1 of 2

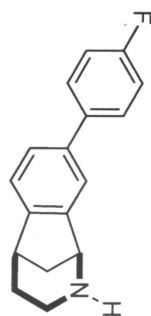

23{2,10}

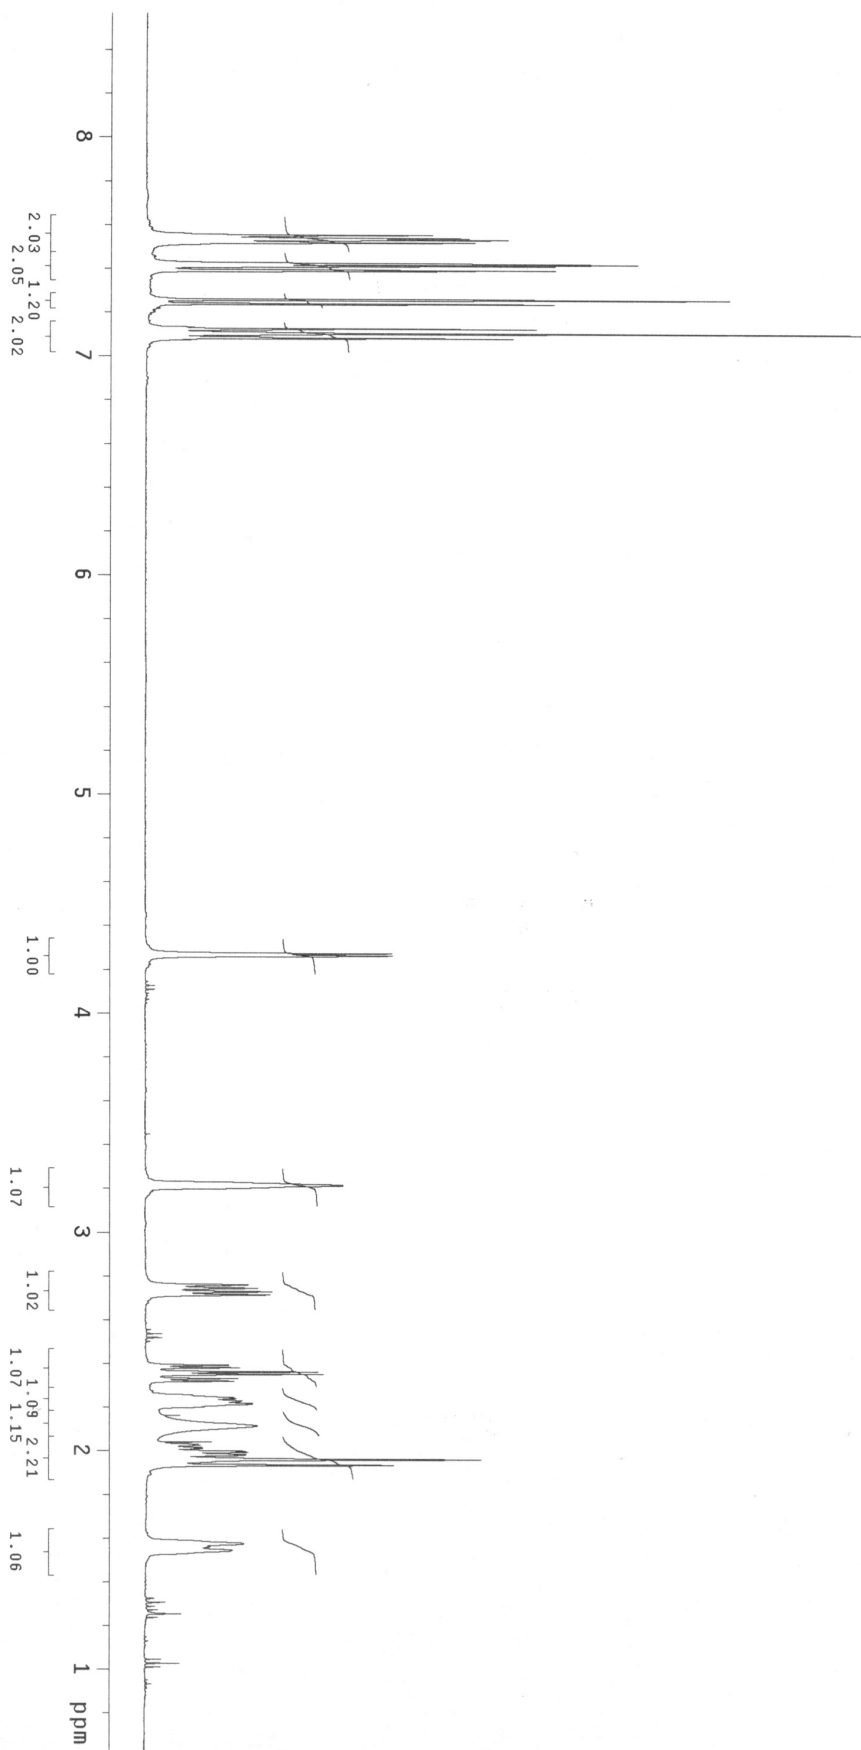

13C OBSERVE

expt std13c

23{2,10}

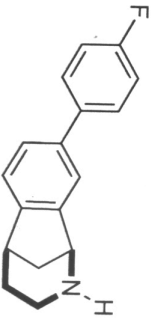

|             |             |            |          |           |
|-------------|-------------|------------|----------|-----------|
| date        | Jun 10 2009 | dfreq      | 300.141  | DEC. & VT |
| solvent     | CDCl3       | dn         | H1       |           |
| file        | exp         | dpwr       | 40       |           |
| ACQUISITION |             | dof        | 400.0    |           |
| sfrq        | 75.478      | dm         | YYY      |           |
| tn          | C13         | dmm        | v        |           |
| at          | 1.777       | dmt        | 8000     |           |
| np          | 64000       | dseq       |          |           |
| sw          | 18009.9     | dres       | 1.0      |           |
| fd          | 10000       | homo       | n        |           |
| DS          | 16          | PROCESSING |          |           |
| tpwr        | 50          | lb         | 1.00     |           |
| pw          | 6.0         | wfite      |          |           |
| d1          | 2.000       | proc       | ft       |           |
| tof         | 586.5       | fn         | not used |           |
| nt          | 1000        | math       | f        |           |
| ct          | 672         |            |          |           |
| alock       | n           | werr       |          |           |
| gain        | 60          | wexp       |          |           |
| FLAGS       |             | wbs        |          |           |
| il          | n           | wnt        |          |           |
| in          | n           |            |          |           |
| dp          | n           |            |          |           |
| hs          | nn          |            |          |           |
| DISPLAY     |             |            |          |           |
| SP          | -853.9      |            |          |           |
| WP          | 18009.9     |            |          |           |
| VS          | 74          |            |          |           |
| SC          | 0           |            |          |           |
| WC          | 250         |            |          |           |
| h2mm        | 72.04       |            |          |           |
| IS          | 500.00      |            |          |           |
| FTI         | 853.9       |            |          |           |
| FTP         | 0           |            |          |           |
| lh          | 20          |            |          |           |
| ins         | 100.000     |            |          |           |
| nm          | no          |            |          |           |
| ph          |             |            |          |           |

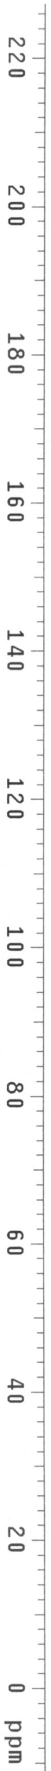

Data File L:\06-12\SAHN\140612-JJS-1-1451-19046.D  
Sample Name: jjs-1-145

=====  
Acq. Operator : sahn@mail.utexas.edu  
Acq. Instrument : LCMS Location : Vial 2  
Injection Date : 6/14/2012 9:39:07 AM Inj Volume : 1.0 µl  
Acq. Method : C:\CHEM32\1\METHODS\SP NIH.M  
Last changed : 6/14/2012 9:38:46 AM by sahn@mail.utexas.edu  
(modified after loading)  
Analysis Method : C:\CHEM32\1\METHODS\DEEF\_LC.M  
Last changed : 9/28/2011 3:20:36 PM  
Sample Info : Easy-Access Method: 'SP NIH'

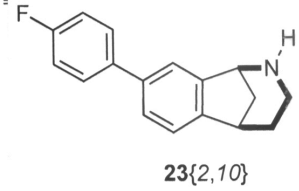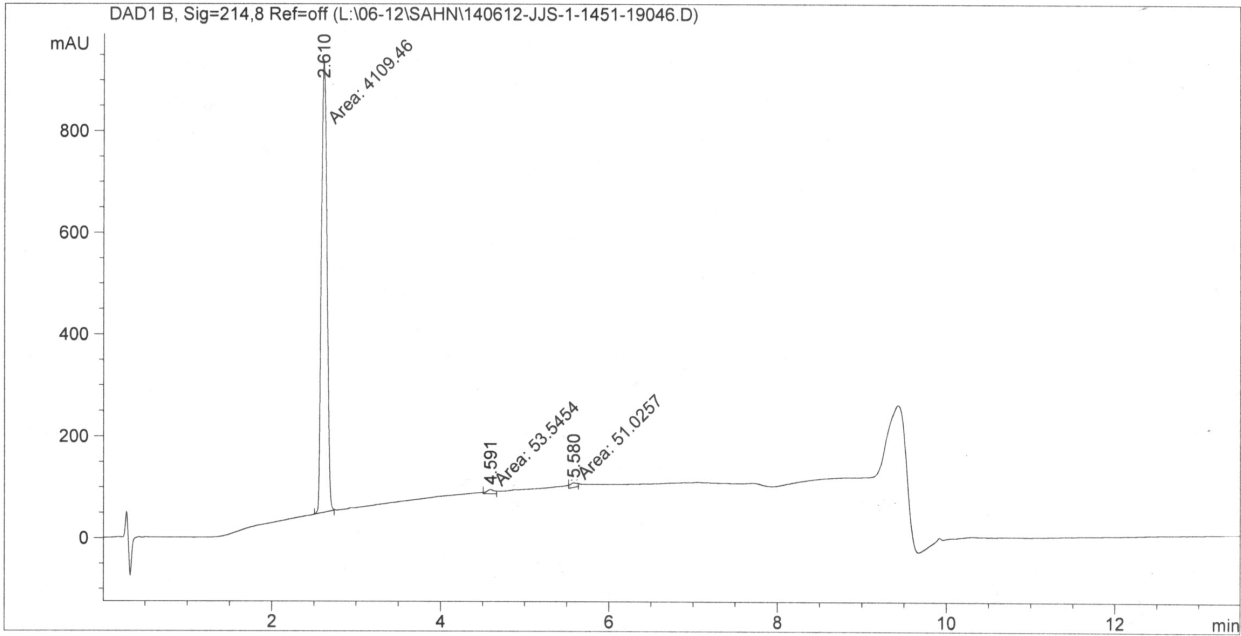

=====  
Area Percent Report  
=====

Sorted By : Signal  
Multiplier: : 1.0000  
Dilution: : 1.0000  
Use Multiplier & Dilution Factor with ISTDs

Signal 1: DAD1 B, Sig=214,8 Ref=off

| Peak # | RetTime [min] | Type | Width [min] | Area [mAU*s] | Height [mAU] | Area %  |
|--------|---------------|------|-------------|--------------|--------------|---------|
| 1      | 2.610         | MM   | 0.0767      | 4109.46436   | 892.62555    | 97.5185 |
| 2      | 4.591         | MM   | 0.1078      | 53.54543     | 8.27777      | 1.2706  |
| 3      | 5.580         | MM   | 0.0966      | 51.02567     | 8.80549      | 1.2109  |

Totals : 4214.03545 909.70882

STANDARD 1H OBSERVE

```

expt std1h
SAMPLE DEC. & VT
date Oct 27 2010 dfrq 400.269
solvent CDCl3 dn H1
f1file exp dpwr 30
f2file ACQUISITION dof 0
sfrq 400.269 dm nmh
tn H1 dmm C
at 2.856 dmf 200
np 32000 lb PROCESSING 0.10
sw 5602.2 wffile
fb not used wfproc
bs 2 fn not used
tpwr 58 ft
pw 2.0 werr
d1 2.000 wexp
tof 169.9 wbs
nt 100 wnt
ct 34
atlock gain not used
flags not used
i1 n
in n
dp y
DISPLAY -95.4
sp wd 3984.6
vs 157
sc 0
wc 250
hzmm 15.94
is 301.56
rf1 646.9
rfp 9
th 1.000
mm cdc ph
  
```

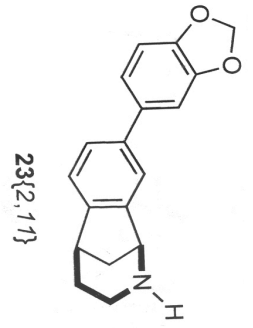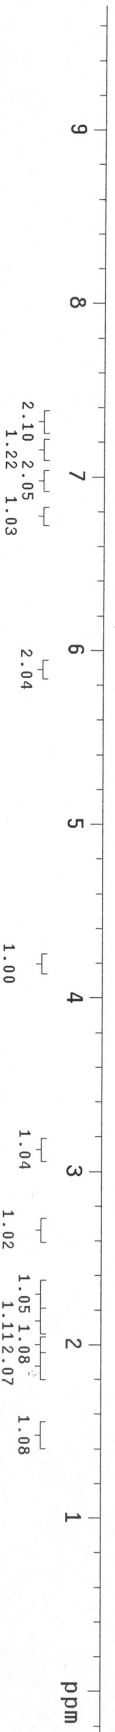

13C OBSERVE

exptl std13c

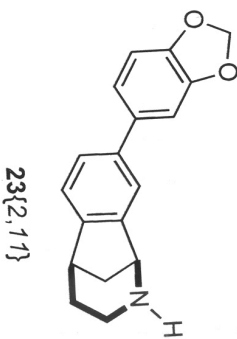

23(2,11)

SAMPLE DEC. & VT  
date Jun 3 2009 dfrq 300.142  
solvent cd2cl2 dn H1  
file exp 40  
ACQUISITION dof 400.0  
sfrq 75.478 dm YYY  
tn C13 dmm W  
at 1.777 dmf 8000  
np 64000 dseg  
sw 18009.9 dres 1.0  
fb 10000 homo n  
bs 16 PROCESSING 1.00  
tpwr 50 lb  
pw 6.0 wffile  
dl 2.000 ploc ft  
tof 366.5 fn not used  
nt 4000 math f  
ct 640  
alock n  
gain n  
flags n  
i1 n  
in n  
dp n  
hs n  
DISPLAY -192.2  
sp wd -192.2  
vs vs 12691.6  
sc 199  
w/c 250  
hzmm 50.77  
ls 500.00  
rfi 853.9  
rfp 0  
th 9  
tms no 100.000  
nm ph

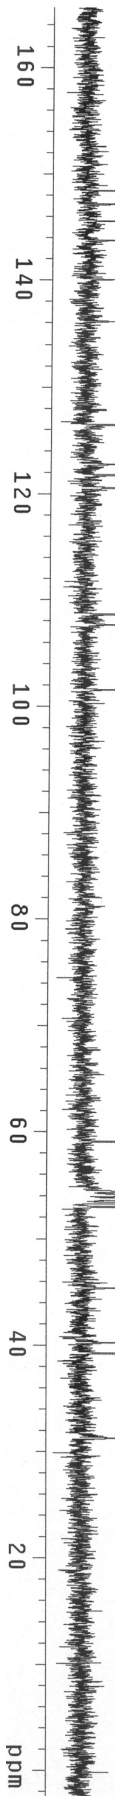



Data File L:\10-10\SAHN\271010-JJS-2-0261-06305.D  
Sample Name: jjs-2-026 3

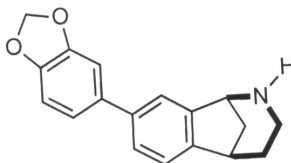

23{2,11}

=====  
Acq. Operator : sahn@mail.utexas.edu  
Acq. Instrument : LCMS  
Injection Date : 10/27/2010 4:31:56 PM  
  
Acq. Method : C:\CHEM32\1\METHODS\SP NIH.M  
Last changed : 10/27/2010 4:31:40 PM by sahn@mail.utexas.edu  
(modified after loading)  
Analysis Method : C:\CHEM32\1\METHODS\DEF\_LC.M  
Last changed : 11/20/2006 4:14:44 AM  
Sample Info : Easy-Access Method: 'SP NIH'

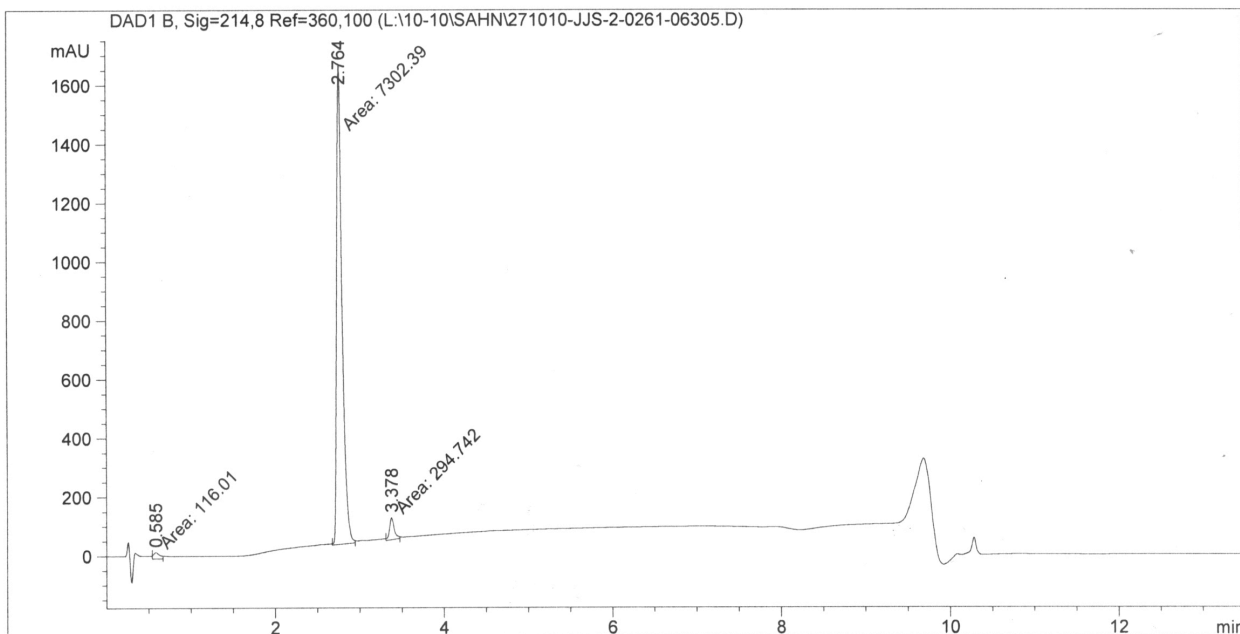

=====  
Area Percent Report  
=====

Sorted By : Signal  
Multiplier: : 1.0000  
Dilution: : 1.0000  
Use Multiplier & Dilution Factor with ISTDs

Signal 1: DAD1 B, Sig=214,8 Ref=360,100

| Peak # | RetTime [min] | Type | Width [min] | Area [mAU*s] | Height [mAU] | Area %  |
|--------|---------------|------|-------------|--------------|--------------|---------|
| 1      | 0.585         | MM   | 0.0895      | 116.00992    | 21.60857     | 1.5041  |
| 2      | 2.764         | MM   | 0.0741      | 7302.39258   | 1641.52917   | 94.6747 |
| 3      | 3.378         | MM   | 0.0652      | 294.74188    | 75.31119     | 3.8213  |

Totals : 7713.14438 1738.44893

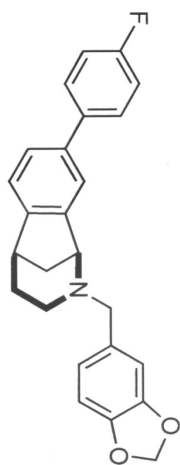

26{2,10,3}

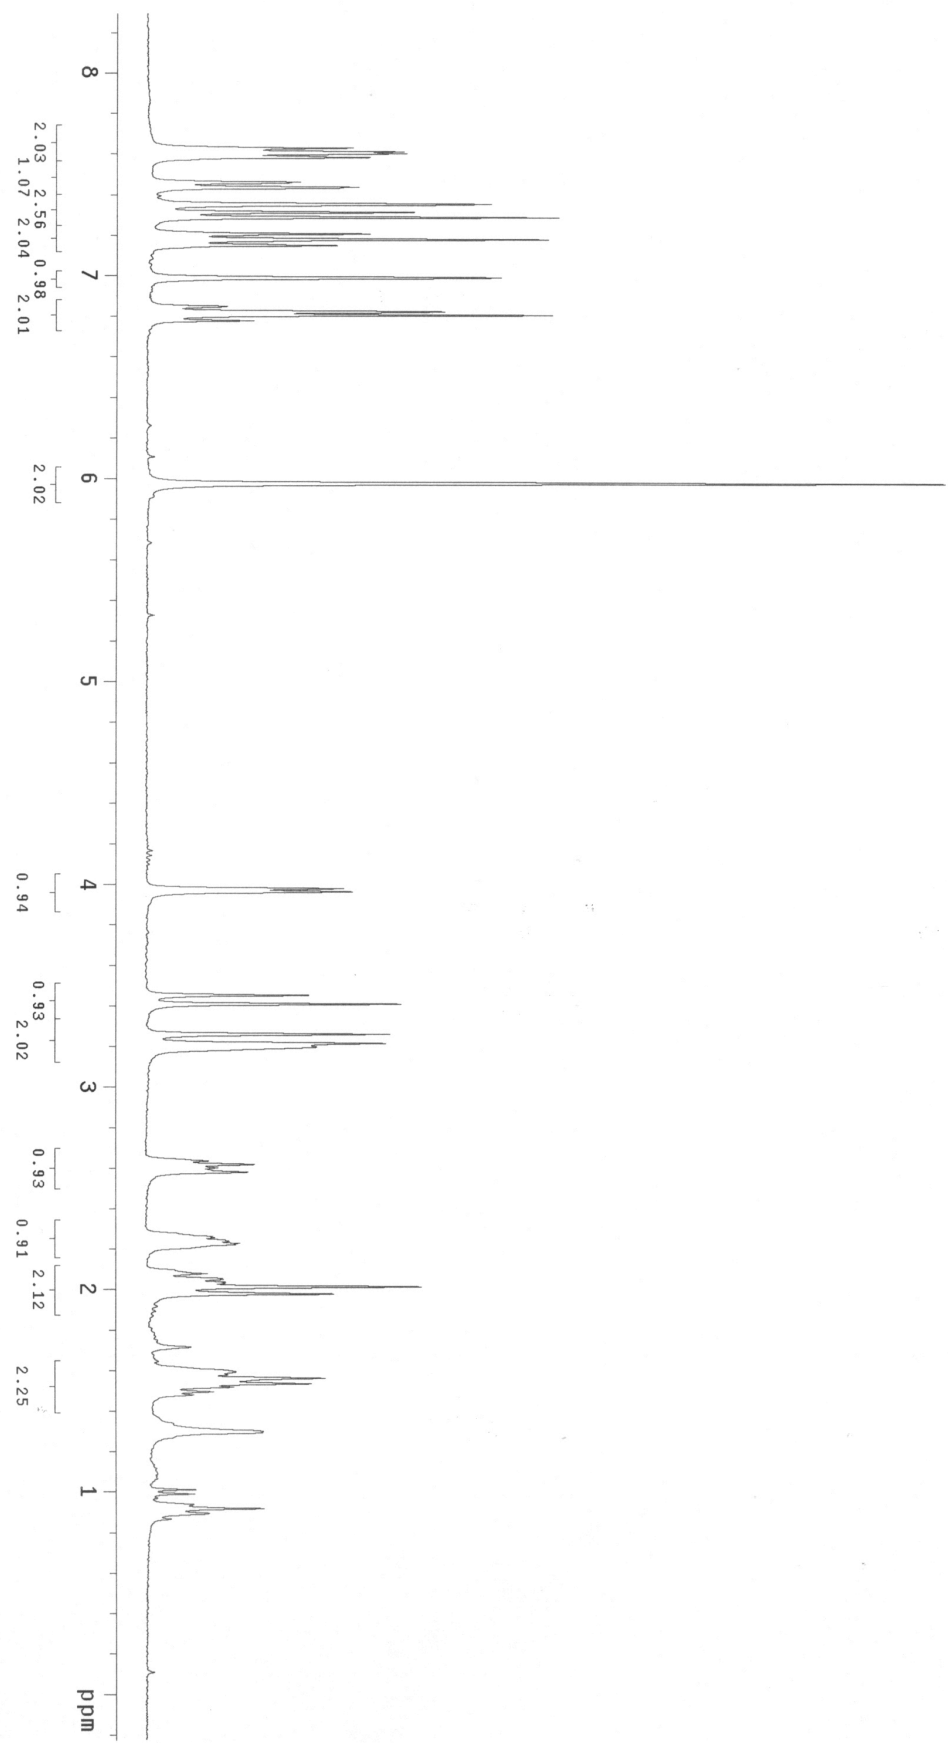

13C OBSERVE

expi std13c

SAMPLE DEC. & VT  
date Jul 19 2009 dfrq 300.141  
solvent CDC13 dn H1  
file exp 40  
ACQUISITION dof 400.0  
sfrq 75.478 dm YYY  
tn C13 dmm W  
at 1.777 dmf 8000  
np 64000 dseq  
sw 18009.9 dres 1.0  
fd 10000 homo n  
DS PROCESSING n  
tpwr 6 lb 1.00  
pw 6.0 wffile  
dl 2.000 proc ft  
tof 586.5 fn not used  
nt 3000 math f  
ct 1464  
alock n werr  
gain 60 wexp  
il n wbs  
in n wnt  
dp n  
hs nn

DISPLAY  
sp 1367.1  
wp 11982.6  
vs 124  
vc 0  
wc 250  
h2mm 47.93  
ts 500.00  
rfl 853.9  
rflp 0  
th 20  
ins 100.000  
nm no ph

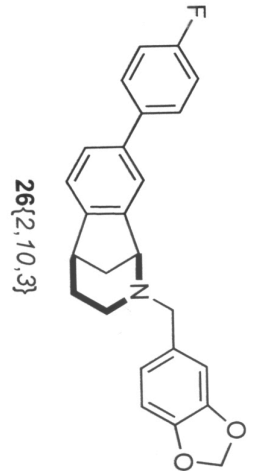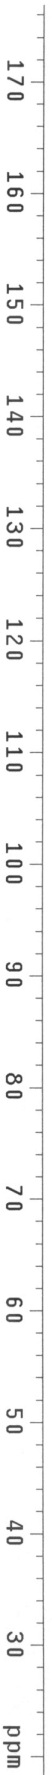

Data File L:\06-12\SAHN\130612-JJS-1-1491-19037.D  
Sample Name: jjs-1-149

=====  
Acq. Operator : sahn@mail.utexas.edu  
Acq. Instrument : LCMS  
Injection Date : 6/13/2012 9:08:33 PM  
  
Acq. Method : C:\CHEM32\1\METHODS\SP NIH.M  
Last changed : 6/13/2012 9:08:19 PM by sahn@mail.  
(modified after loading)  
Analysis Method : C:\CHEM32\1\METHODS\DEEF\_LC.M  
Last changed : 6/13/2012 3:34:08 PM  
(modified after loading)  
Sample Info : Easy-Access Method: 'SP NIH'

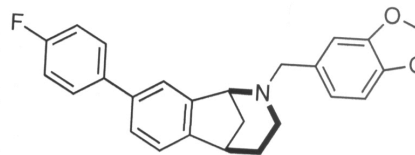

26{2,10,3}

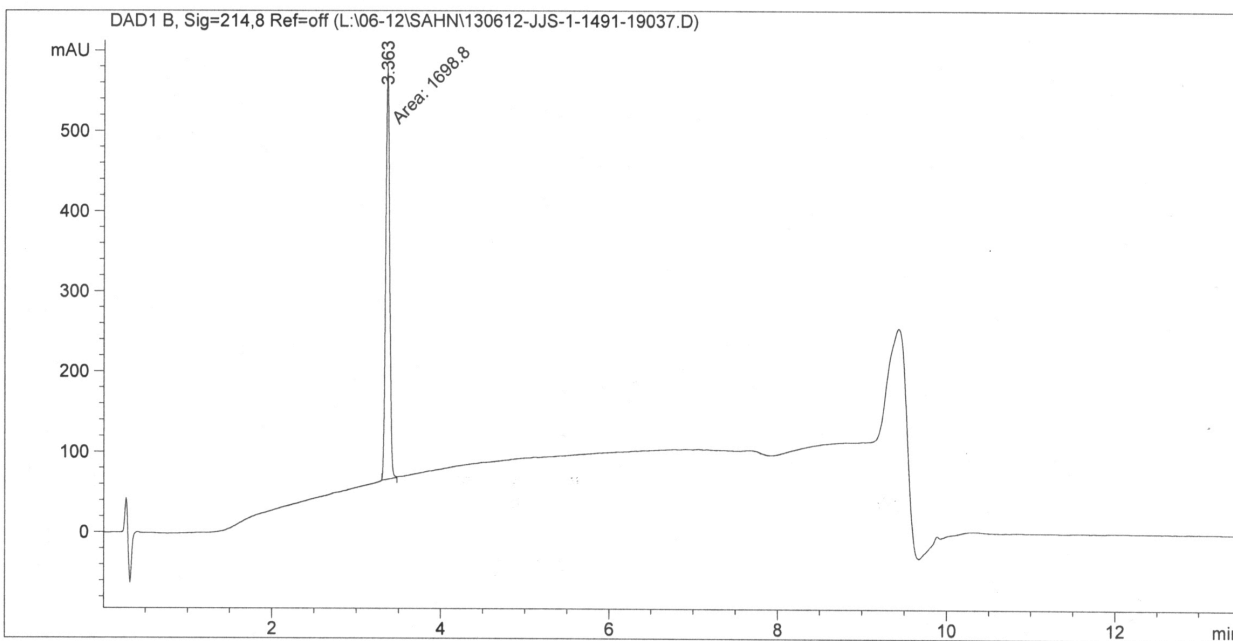

=====  
Area Percent Report  
=====

Sorted By : Signal  
Multiplier: : 1.0000  
Dilution: : 1.0000  
Use Multiplier & Dilution Factor with ISTDs

Signal 1: DAD1 B, Sig=214,8 Ref=off

| Peak # | RetTime [min] | Type | Width [min] | Area [mAU*s] | Height [mAU] | Area %   |
|--------|---------------|------|-------------|--------------|--------------|----------|
| 1      | 3.363         | MM   | 0.0547      | 1698.80042   | 517.54065    | 100.0000 |

Totals : 1698.80042 517.54065

STANDARD 1H OBSERVE

expt1 std1h

SAMPLE Jul 13 2009 DEC. & VT 400.269  
 date CDC13 dn H1  
 solvent CDC13 exp H1  
 file ACQUISITION exp 30  
 sfrm 400.269 dm 0  
 tn H1 dmm nm  
 at 2.856 dmf 200  
 np 32000 PROCESSING 0.10  
 sw 5602.2 lb wtfile  
 fb not used wproc  
 bs 2 proc ft  
 tpwr 58 fn  
 pw 2.0 wert  
 dl 2.000 wexp  
 tof 169.9 wbs  
 nt 200 wnt  
 ct 32  
 alock n  
 gain not used  
 flags not used

DISPLAY -44.1  
 wp 3419.3  
 vs 147  
 sc 0  
 wc 250  
 hzmm 13.68  
 is 301.56  
 rfl 614.1  
 rfp 0  
 th 20  
 ins 1.000  
 nm cdc ph

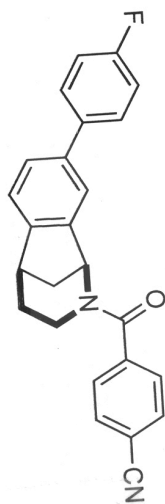

28{2,10,15}

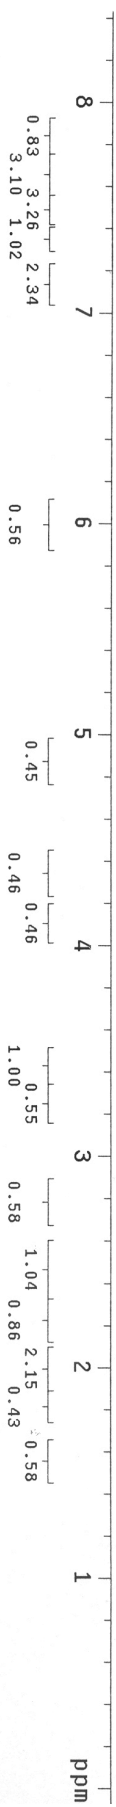

13C OBSERVE

expi std13c

```
SAMPLE          DEC. & VT
date Jul 13 2009  dfrq 300.141
solvent CDC13     dn    H1
file          exp  dpwr 400.0
ACQUISITION  dof   40
sfrq 75.478     dm    YYY
in     C13       dmm   W
at     1.277     dmf   8000
np     64000     dres  1.0
sw     18009.9   home  N
td     10000     PROCESsing 1.00
bs     50        lb    wtfile
tpwr  6.0       wfile
pw     2.000    proc   ft
dl     586.5    fn    not used
tof    1000     math  f
ct     744     weff  N
atock  n        wexp  N
gain   60       wbs   W
flags  n        wnt   W
il     n        hs    nn
in     n
dp     n
hs     nn
DISPLAY -286.7
SP      16071.5
WP      172
VS      250
WC      64.28
hZmm    500.00
IS      853.9
rf1     0
rfp     20
th      100.000
nm      no ph
```

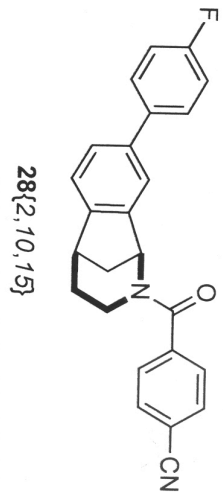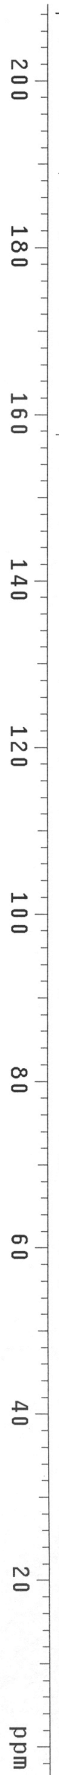

Data File L:\06-12\SAHN\130612-JJS-1-153B21-19028.D  
Sample Name: jjs-1-153B2

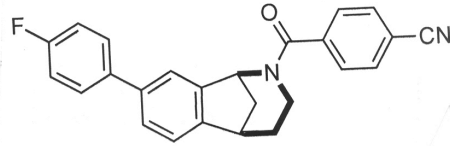

28{2,10,15}

=====  
Acq. Operator : sahn@mail.utexas.edu  
Acq. Instrument : LCMS  
Injection Date : 6/13/2012 4:13:07 PM  
  
Acq. Method : C:\CHEM32\1\METHODS\SP NIH.M  
Last changed : 6/13/2012 4:12:46 PM by sahn@mail.utexas.edu  
(modified after loading)  
Analysis Method : C:\CHEM32\1\METHODS\DEEF\_LC.M  
Last changed : 6/13/2012 3:34:08 PM  
(modified after loading)  
Sample Info : Easy-Access Method: 'SP NIH'

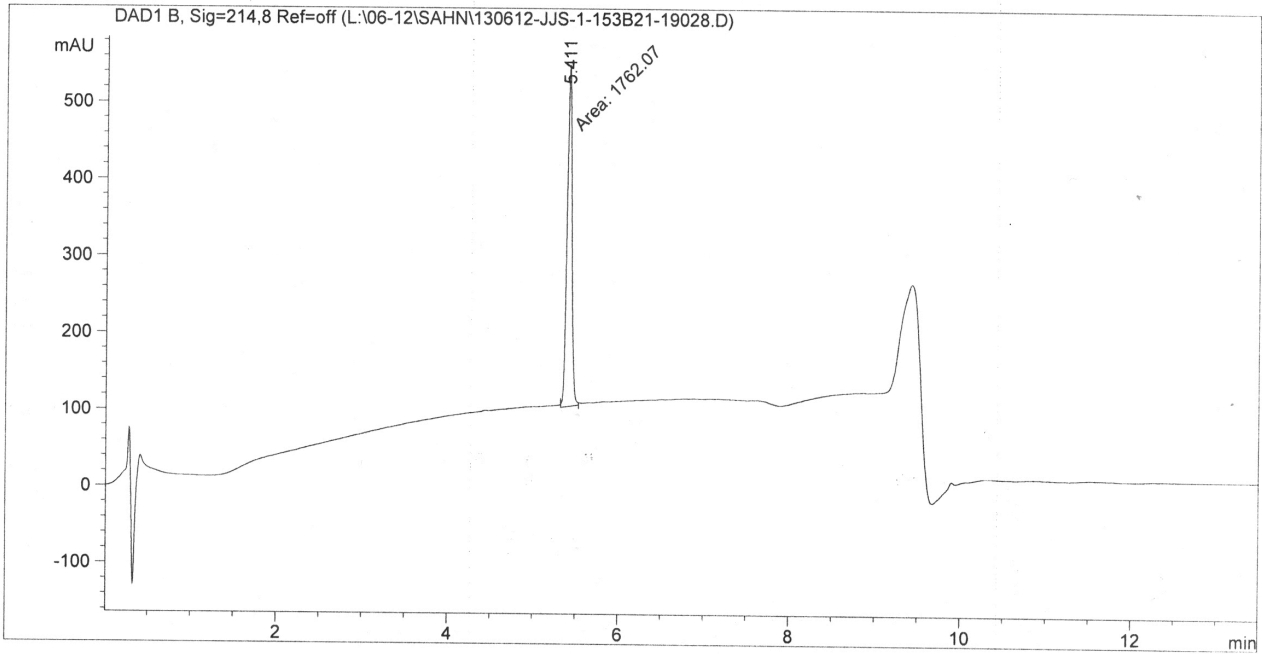

=====  
Area Percent Report  
=====

Sorted By : Signal  
Multiplier: : 1.0000  
Dilution: : 1.0000  
Use Multiplier & Dilution Factor with ISTDs

Signal 1: DAD1 B, Sig=214,8 Ref=off

| Peak # | RetTime [min] | Type | Width [min] | Area [mAU*s] | Height [mAU] | Area %   |
|--------|---------------|------|-------------|--------------|--------------|----------|
| 1      | 5.411         | MM   | 0.0659      | 1762.06799   | 445.93961    | 100.0000 |

Totals : 1762.06799 445.93961

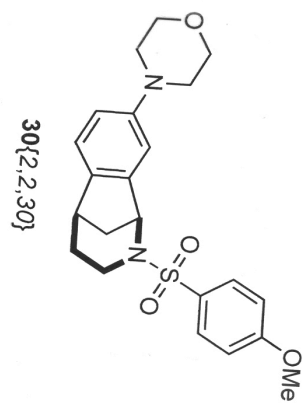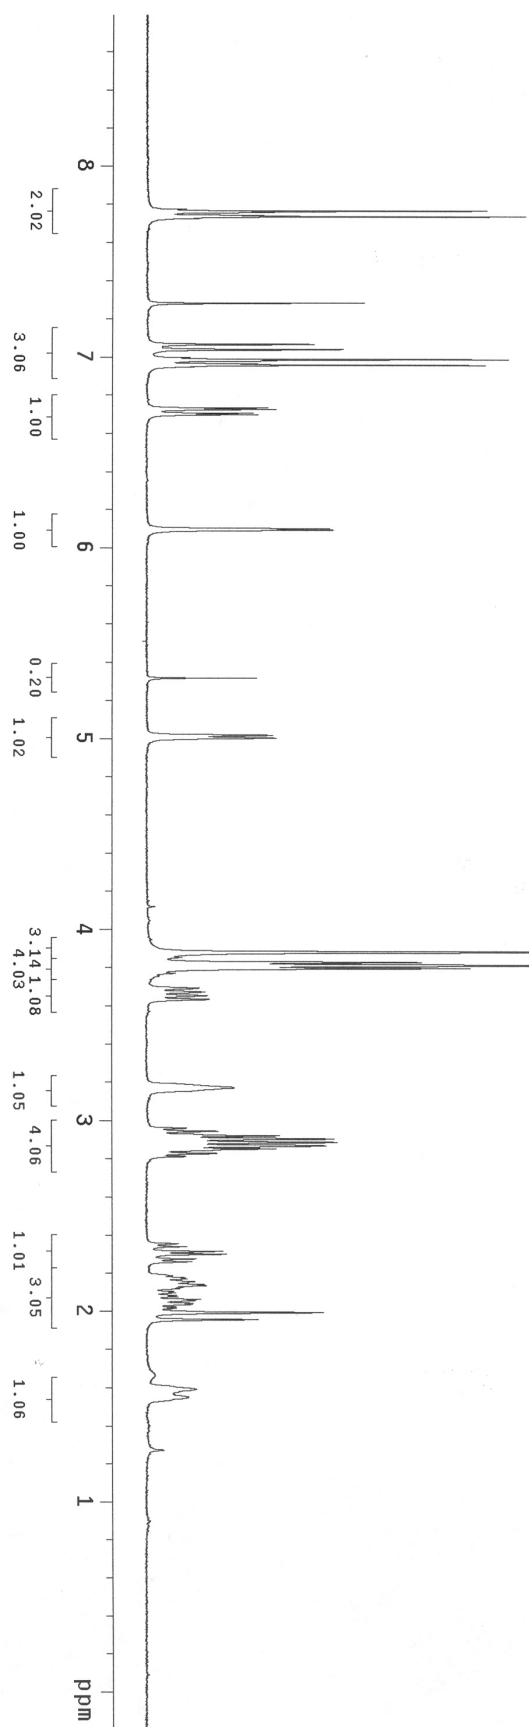



13C OBSERVE

exptl std13c

SAMPLE

date Jul 21 2009

solvent CDC13

file ACQUISITION

sfreq 75.478

in G13

at 1.777

np 64000

sw 18009.9

fb 10000

bs 8

tpwr 50

pw 6.0

di 2.000

tof 586.5

nt 2000

ct 664

alock n

gain n

flags n

fl n

in n

dp n

hs n

DISPLAY

sp -853.9

wp 18009.9

vs 116

sc 0

wc 250

hzmm 72.04

ts 500.00

rfl 853.9

rflp 0

th 20

ins 100.000

nm no

ph

DEC. & VT

dfreq 300.141

dn H1

dpwr 40

dot 400.0

yyy YYY

w 8000

PROCESSING

1.00

lb

wtfile

proc

fn

not used

math

f

werr

wexp

wbs

wnt

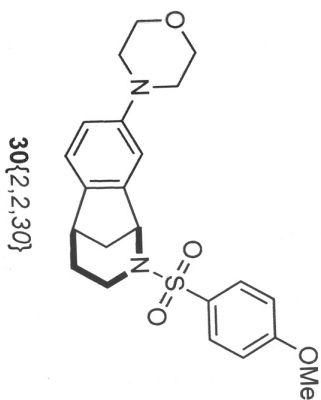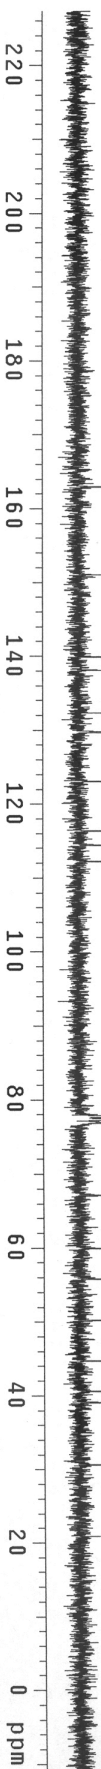

Data File L:\06-12\SAHN\140612-JJS-1-153-D11-19047.D  
Sample Name: jjs-1-153-D1

=====  
Acq. Operator : sahn@mail.utexas.edu  
Acq. Instrument : LCMS  
Injection Date : 6/14/2012 9:54:05 AM  
  
Acq. Method : C:\CHEM32\1\METHODS\SP\_NIH.M  
Last changed : 6/14/2012 9:53:50 AM by sahn@mail.ut  
(modified after loading)  
Analysis Method : C:\CHEM32\1\METHODS\DEEF\_LC.M  
Last changed : 9/28/2011 3:20:36 PM  
Sample Info : Easy-Access Method: 'SP\_NIH'

Loca  
Inj Vo

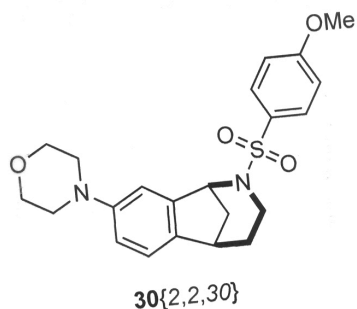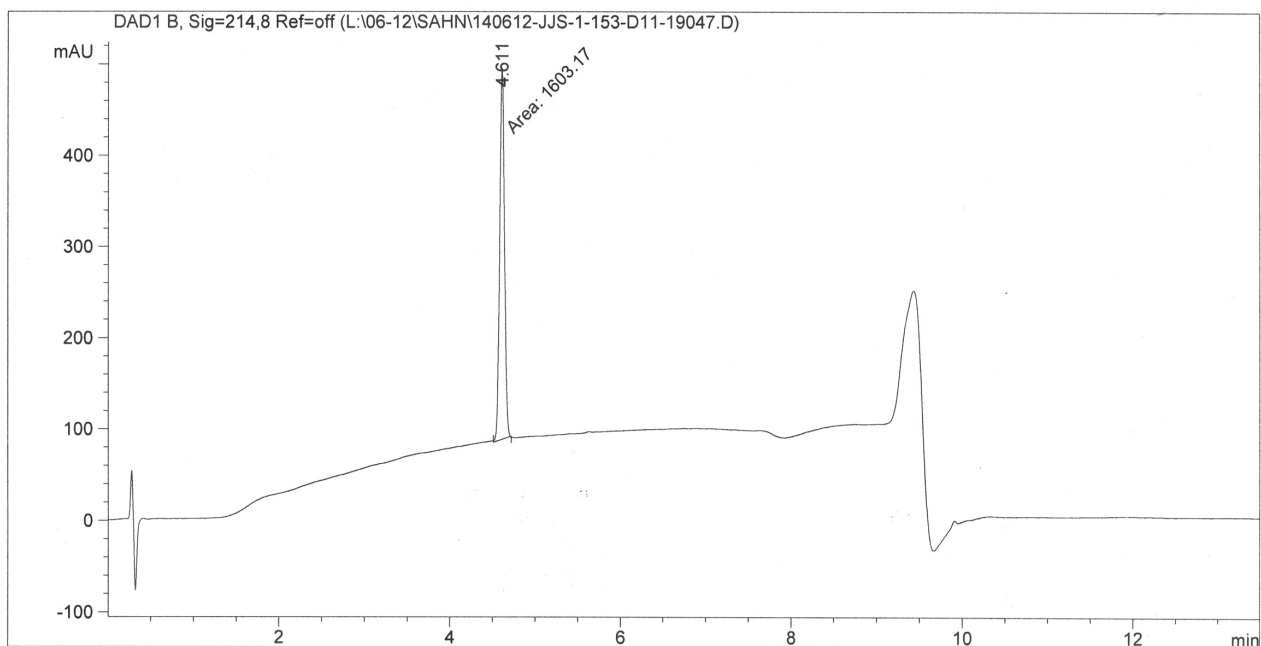

=====  
Area Percent Report  
=====

Sorted By : Signal  
Multiplier: : 1.0000  
Dilution: : 1.0000  
Use Multiplier & Dilution Factor with ISTDs

Signal 1: DAD1 B, Sig=214,8 Ref=off

| Peak # | RetTime [min] | Type | Width [min] | Area [mAU*s] | Height [mAU] | Area %   |
|--------|---------------|------|-------------|--------------|--------------|----------|
| 1      | 4.611         | MM   | 0.0650      | 1603.17493   | 411.30872    | 100.0000 |

Totals : 1603.17493 411.30872

STANDARD 1H OBSERVE

```

expt  std1h
SAMPLE 1 2010 DEC. & VT 400.269
date  Nov  CDC13  dn  H1
solvent  exp  dm  H1
file  ACQUISITION  dof  30
sfrq  400.269  dm  mmh
in  H1  dmm  C
at  2.856  dmf  200
np  32000  lb  PROCESSING  0.10
sw  5602.2  wfftfile
fb  not used  ft
bs  not used  fn
tpwr  2.0  werr  not used
pw  2.000  wexp
dl  169.9  wbs
nt  60  wnt
ct  0
atlock  not used
gain  not used
flags  not used
il  n
in  n
dp  y
DISPLAY  -187.3
sp  WP  4624.0
vs  SC  183
WC  0
h2mm  250
is  18.50
rfl  301.56
ffp  614.1
th  0
ins  4
nm  cdc  ph  2.000
  
```

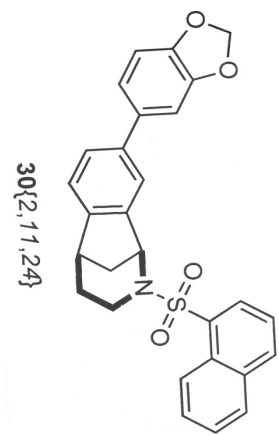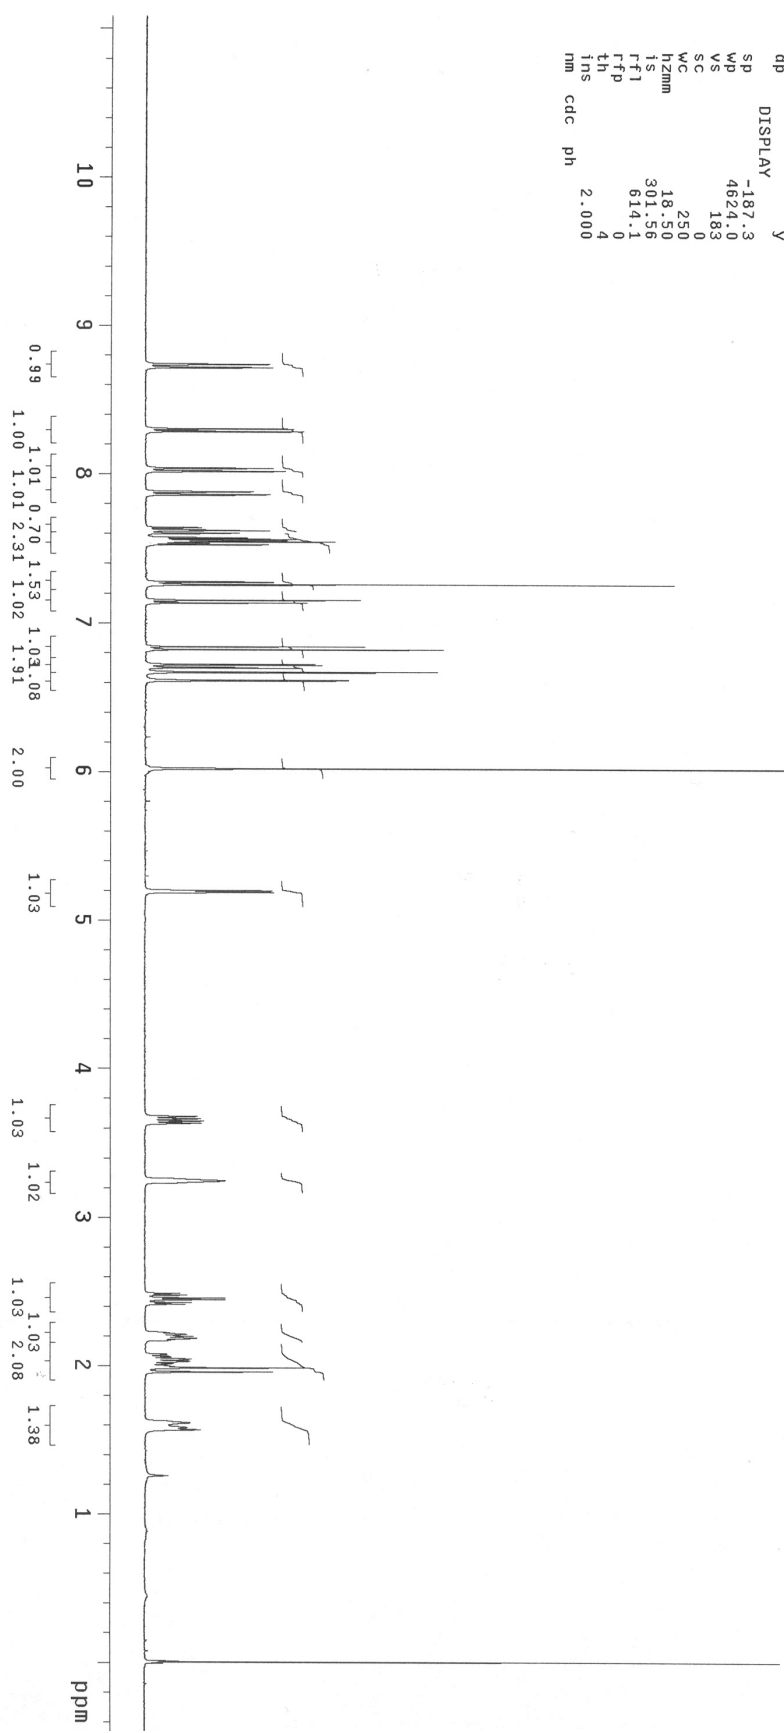

JJS-3-027-D

exptl Carbon

|                     |               |         |          |
|---------------------|---------------|---------|----------|
| date                | Nov 5 2010    | temp    | 27.0     |
| solvent             | cdcl3         | gain    | 50       |
| file                | /home/pace/1~ | spin    | 20       |
| 1_10/jjs_3_027_d_c~ | hsi           | 0.008   |          |
| 13.fid              | pw90          | 15.500  |          |
| 13.fid              | alfa          | 10.000  |          |
| ACQUISITION         |               |         |          |
| sw                  | 30131.8       | flags   |          |
| at                  | 1.082         | f1      | n        |
| np                  | 64000         | in      | n        |
| fb                  | 17000         | dp      | y        |
| bs                  | 64            | hs      | mn       |
| ss                  | 64            | hs      |          |
| d1                  | 2.000         | lb      |          |
| nt                  | 20000         | fn      | 1.00     |
| ct                  | 5422          | fn      | not used |
| TRANSMITTER         | SP            | DISPLAY |          |
| tn                  | G13           | WD      | -628.1   |
| sfrq                | 125.584       | rfl     | 25741.9  |
| tof                 | 1254.2        | rfp     | 1909.9   |
| tpwr                | 5.1           | lp      | -106.9   |
| pw                  | 4.000         | lp      | -194.9   |
| DECOUPLER           | H1            | WC      | 250      |
| dn                  | 0             | SC      | 0        |
| hof                 | 0             | VS      | 15929    |
| dm                  | YYY           | th      | 16       |
| dmm                 | W             | at      | cdc      |
| dpwr                | 39            | ph      |          |
| dmf                 | 12500         |         |          |

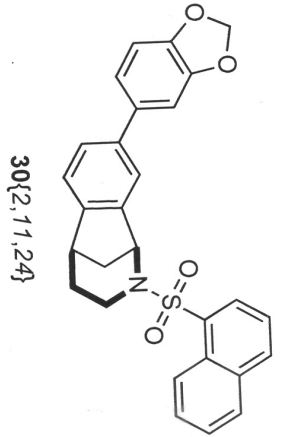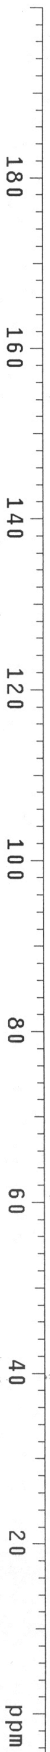

=====  
Acq. Operator : sahn@mail.utexas.edu  
Acq. Instrument : LCMS Location :  
Injection Date : 11/1/2010 5:23:26 PM Inj Volume :  
Acq. Method : C:\CHEM32\1\METHODS\SP\_NIH.M  
Last changed : 11/1/2010 5:23:11 PM by sahn@mail.utexas.edu  
(modified after loading)  
Analysis Method : C:\CHEM32\1\METHODS\DEF\_LC.M  
Last changed : 11/20/2006 4:14:44 AM  
Sample Info : Easy-Access Method: 'SP\_NIH'

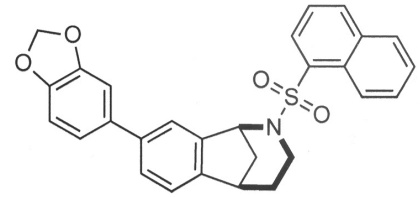

30{2,11,24}

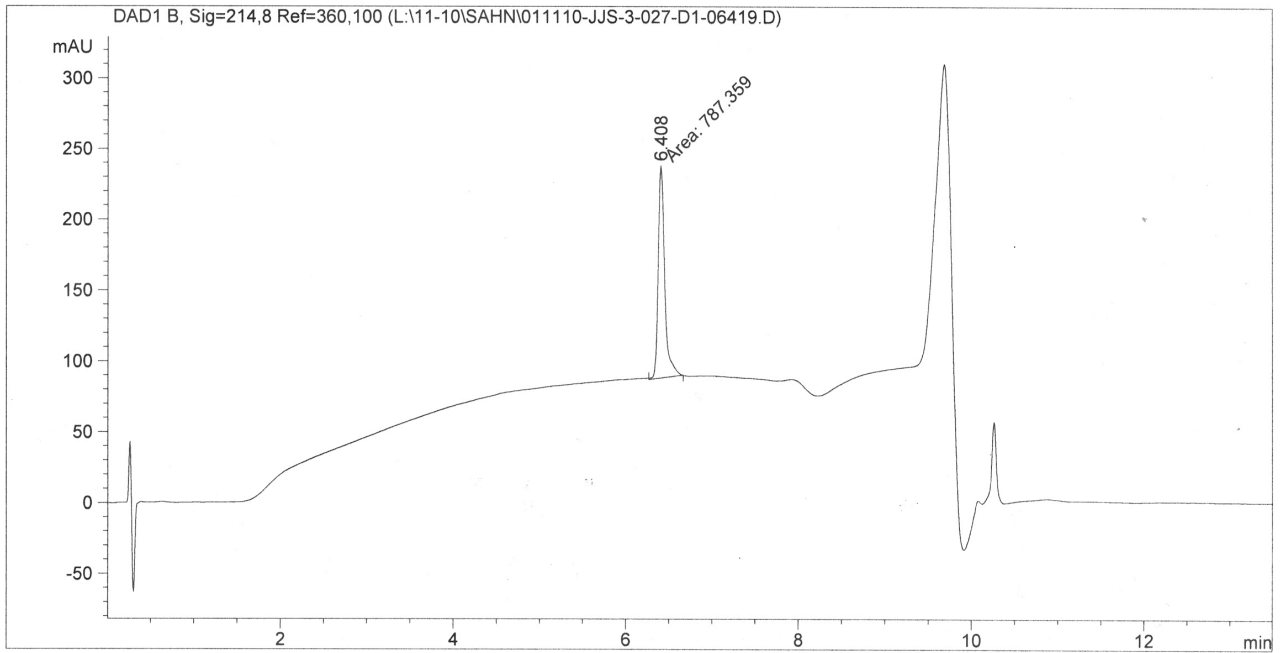

=====  
Area Percent Report  
=====

Sorted By : Signal  
Multiplier: : 1.0000  
Dilution: : 1.0000  
Use Multiplier & Dilution Factor with ISTDs

Signal 1: DAD1 B, Sig=214,8 Ref=360,100

| Peak # | RetTime [min] | Type | Width [min] | Area [mAU*s] | Height [mAU] | Area %   |
|--------|---------------|------|-------------|--------------|--------------|----------|
| 1      | 6.408         | MM   | 0.0874      | 787.35876    | 150.15947    | 100.0000 |

Totals : 787.35876 150.15947

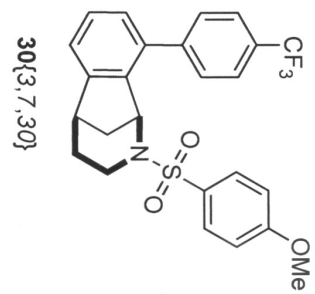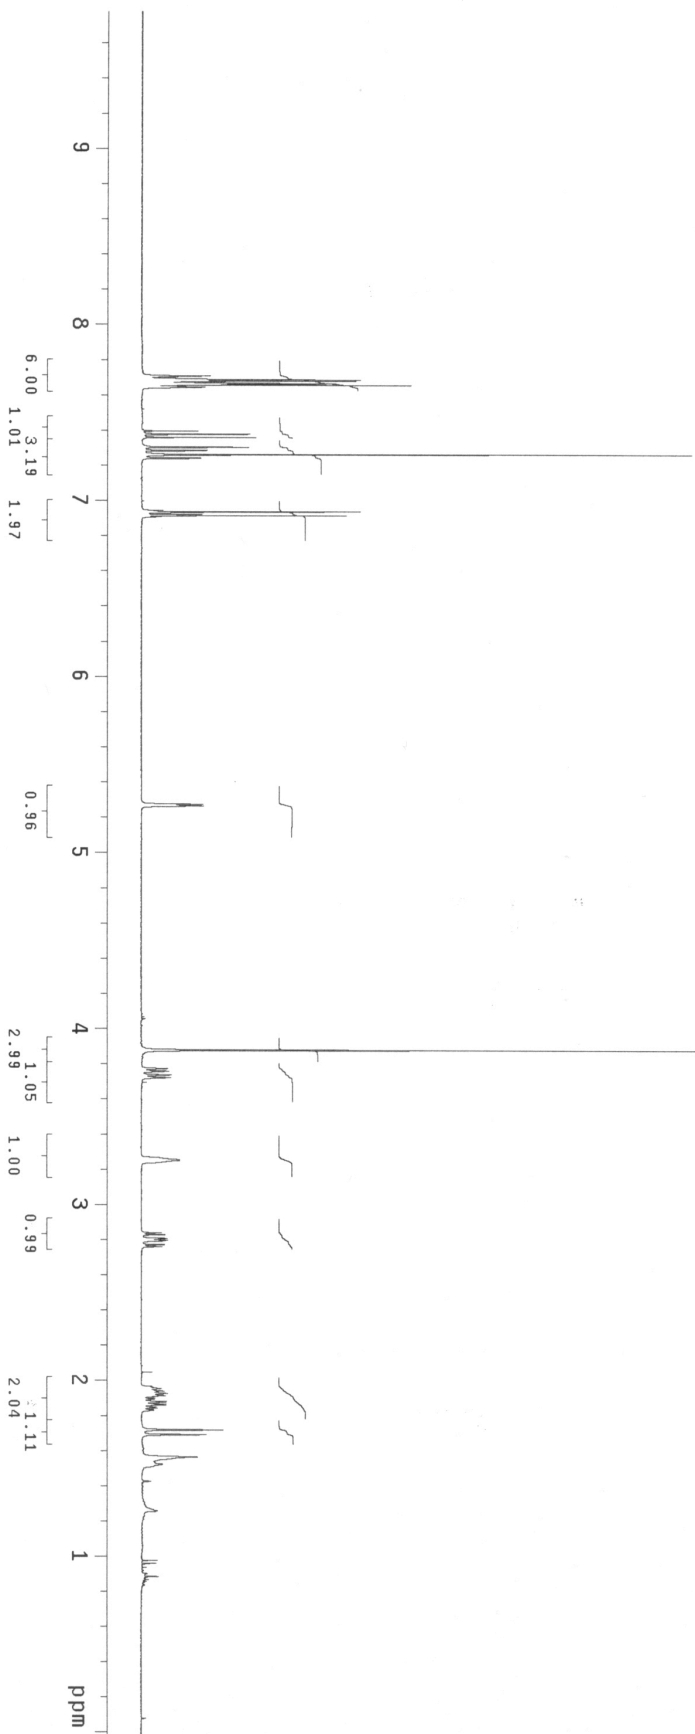

JJS-2-025B

exp4 Carbon

|                     |                |       |          |
|---------------------|----------------|-------|----------|
| date                | Jul 21 2010    | temp  | 27.0     |
| solvent             | cdc13          | gain  | 50       |
| file                | /home/space/d~ | spin  | 20       |
| ata/jjs_2_025b_c13~ | hst            | pw90  | 15.500   |
| fid                 | atfa           | pw90  | 10.000   |
| ACQUISITION         | 30143.2        | alfta | 10.000   |
| sw                  | 1.062          | l1    | n        |
| at                  | 64024          | in    | n        |
| np                  | 17000          | dp    | y        |
| fb                  | 64             | hs    | nm       |
| bs                  | 64             | hs    | nm       |
| ss                  | 2.000          | fb    | not used |
| d1                  | 4000           | fn    | not used |
| nt                  | 2501           | fn    | not used |
| ct                  | TRANSMITTER    | SP    | DISPLAY  |
| tn                  | C13            | WP    | -628.3   |
| strq                | 125.587        | FF1   | 25742.4  |
| lof                 | 1254.2         | FF1   | 13586.1  |
| lpwr                | 51             | TP    | 36771.6  |
| pw                  | 5.000          | TP    | -119.7   |
|                     |                | TP    | -162.5   |
| DECOUPLER           | H1             | WC    | PLOT     |
| dn                  | 0              | WC    | 250      |
| dof                 | 0              | SC    | 0        |
| dm                  | YYY            | VS    | 12843    |
| dmm                 | w              | th    | 68       |
| dpwr                | 39             | at    | cdc ph   |
| dmf                 | 12600          |       |          |

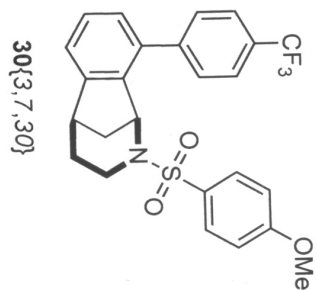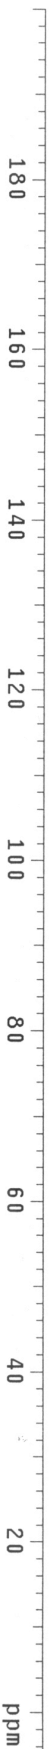

Data File L:\10-10\SAHN\221010-JJS-2-025B1-06143.D  
Sample Name: jjs-2-025B

=====  
Acq. Operator : sahn@mail.utexas.edu  
Acq. Instrument : LCMS Location : Vial 37  
Injection Date : 10/22/2010 7:49:14 PM Inj Volume : 1.0 µl  
Acq. Method : C:\CHEM32\1\METHODS\SP\_NIH.M  
Last changed : 10/22/2010 7:48:59 PM by sahn@mail.utexas.edu  
(modified after loading)  
Analysis Method : C:\CHEM32\1\METHODS\DEF\_LC.M  
Last changed : 11/20/2006 4:14:44 AM  
Sample Info : Easy-Access Method: 'SP\_NIH'

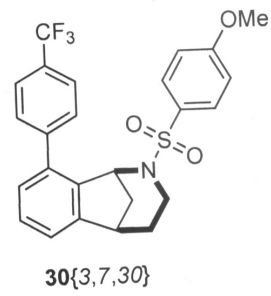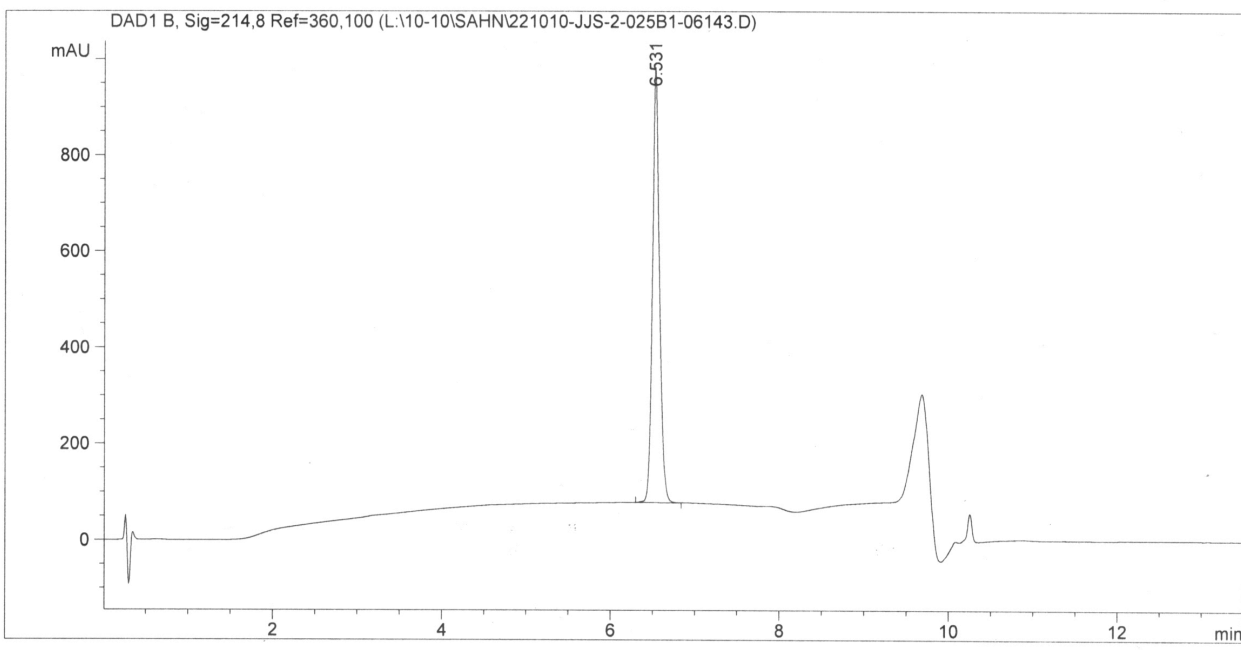

=====  
Area Percent Report  
=====

Sorted By : Signal  
Multiplier: : 1.0000  
Dilution: : 1.0000  
Use Multiplier & Dilution Factor with ISTDs

Signal 1: DAD1 B, Sig=214,8 Ref=360,100

| Peak # | RetTime [min] | Type | Width [min] | Area [mAU*s] | Height [mAU] | Area %   |
|--------|---------------|------|-------------|--------------|--------------|----------|
| 1      | 6.531         | BB   | 0.0852      | 5222.66846   | 906.70734    | 100.0000 |

Totals : 5222.66846 906.70734



STANDARD 1H OBSERVE

```

expt  std1h
SAMPLE  Jun 23 2010  DEC. & VT  400.269
date    Jun 23 2010  dfrq    400.269
solvent CDC13        dn      H1
file    exp         dpwr    30
ACQUISITION  exp    dof     0
sfrq    400.269    dm      nmh
         H1        dmm     200
         H1        dmf     200
at      2.856      dmf    PROCESSING 0.10
np      32000     lb     wtfile
sw      5602.2   not used
fb      not used
bs      2         proc   ft
         58      fn     not used
         2.0     fn     not used
tdwr    2.000    weff
dl      168.9    wexp
tof     100     wbs
nt      172     wnt
ct      172
alock   not used
gain    not used
flags   not used
il      n
in      n
dn      n
dp      Y
DISPLAY -99.8
SP      4329.3
WP      86
VS      0
SC      250
WC      17.32
n2mm    301.56
IS1     644.2
F1P     0
th      6
rms     1.000
nm      cdc  ph
  
```

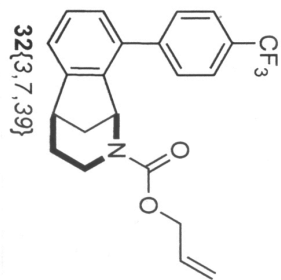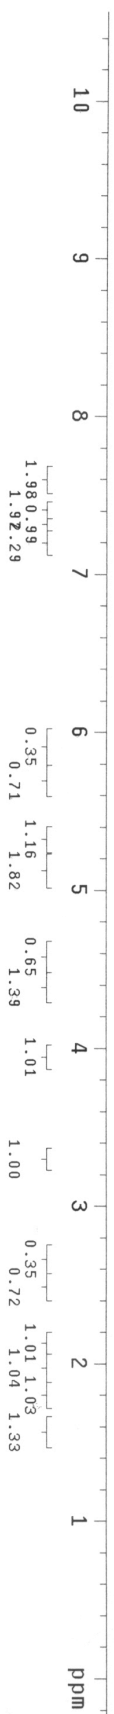

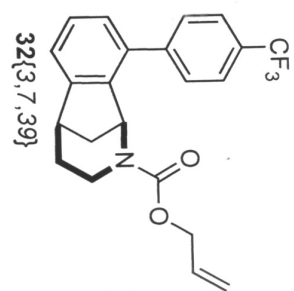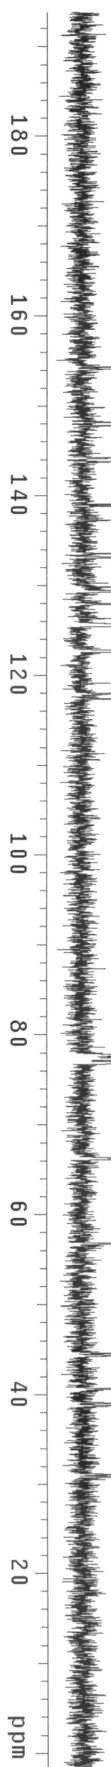

Data File L:\11-10\SAHN\051110-JJS-2-2201-06557.D  
Sample Name: jjs-2-220

=====  
Acq. Operator : sahn@mail.utexas.edu  
Acq. Instrument : LCMS  
Injection Date : 11/5/2010 7:40:54 PM  
Location : Vial 64  
Inj Volume : 1.0 µl  
Acq. Method : C:\CHEM32\1\METHODS\SP\_NIH.M  
Last changed : 11/5/2010 7:40:39 PM by sahn@mail.utexas.edu  
(modified after loading)  
Analysis Method : C:\CHEM32\1\METHODS\DEF\_LC.M  
Last changed : 11/20/2006 4:14:44 AM  
Sample Info : Easy-Access Method: 'SP\_NIH'

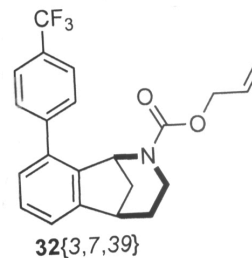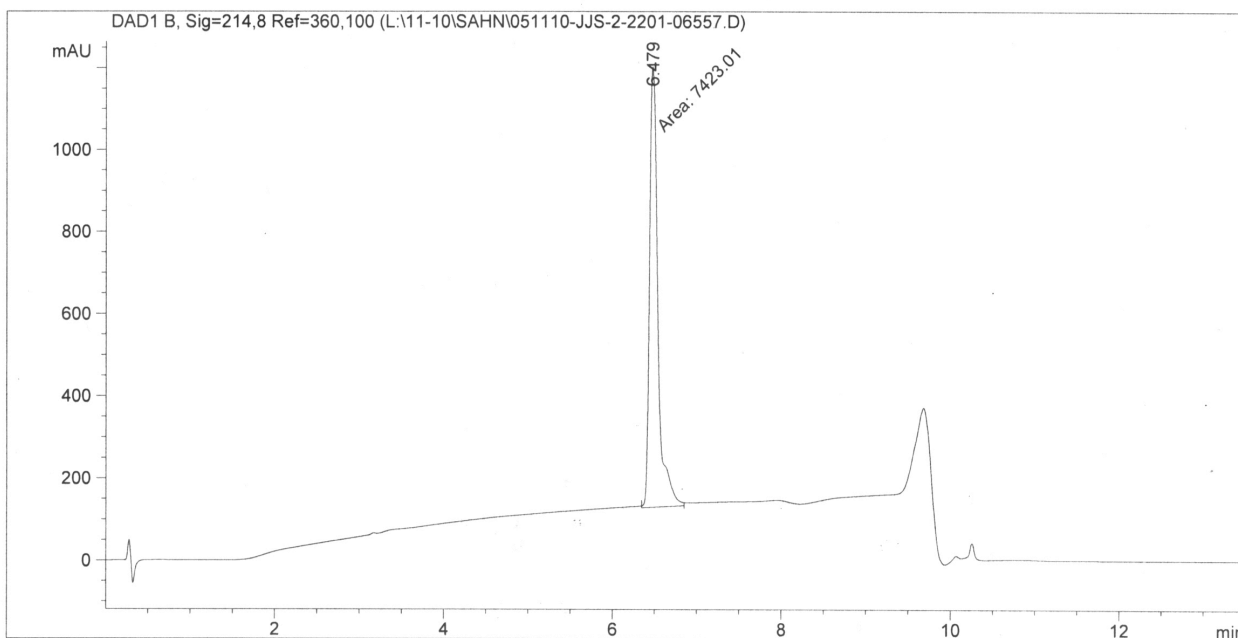

=====  
Area Percent Report  
=====

Sorted By : Signal  
Multiplier: : 1.0000  
Dilution: : 1.0000  
Use Multiplier & Dilution Factor with ISTDs

Signal 1: DAD1 B, Sig=214,8 Ref=360,100

| Peak # | RetTime [min] | Type | Width [min] | Area [mAU*s] | Height [mAU] | Area %   |
|--------|---------------|------|-------------|--------------|--------------|----------|
| 1      | 6.479         | MM   | 0.1152      | 7423.00830   | 1074.12939   | 100.0000 |

Totals : 7423.00830 1074.12939

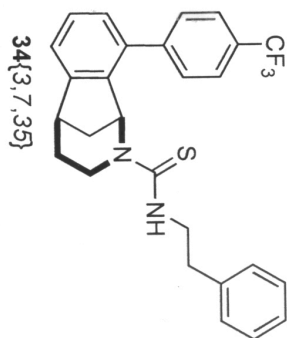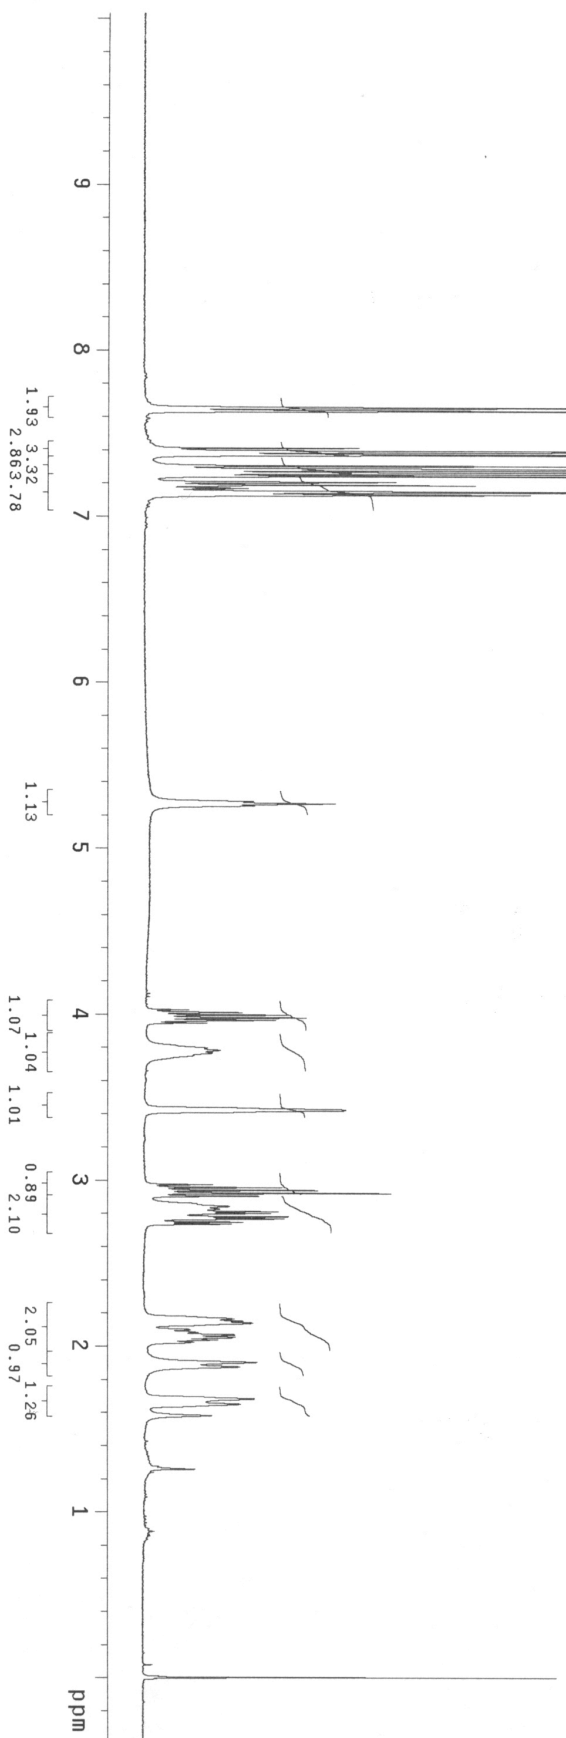

JJS-2-221

exp4 Car-bon

|             |         |             |            |          |
|-------------|---------|-------------|------------|----------|
| SAMPLE      | date    | Jun 30 2010 | temp       | 27.0     |
| SAMPLE      | solvent | cdc13       | gain       | 50       |
| SAMPLE      | file    | exp         | sp1n       | 20       |
| ACQUISITION | sw      | 30143.2     | pw90       | 15.500   |
| ACQUISITION | at      | 1.062       | al1a       | 10.000   |
| ACQUISITION | np      | 64024       | flags      |          |
| ACQUISITION | fb      | 17000       | 11         | n        |
| ACQUISITION | bs      | 64          | in         | n        |
| ACQUISITION | ss      | 64          | dp         | y        |
| ACQUISITION | dl      | 2.000       | hs         | m        |
| ACQUISITION | nt      | 2000        | PROCESSING | 1.00     |
| ACQUISITION | ct      | 2000        | fn         | not used |
| TRANSMITTER | tn      | C13         | lb         | 1.00     |
| TRANSMITTER | sfrq    | 125.587     | sp         | -628.3   |
| TRANSMITTER | tof     | 1254.2      | wp         | 25742.4  |
| TRANSMITTER | tpwr    | 51          | rfl        | 1917.1   |
| TRANSMITTER | pw      | 5.000       | rfp        | 0        |
| DECOUPLER   | dn      | H1          | lp         | -102.3   |
| DECOUPLER   | dof     | 0           | PL0T       | -201.2   |
| DECOUPLER   | dmm     | yyy         | wc         | 250      |
| DECOUPLER   | dmm     | w           | sc         | 0        |
| DECOUPLER   | dpwr    | 39          | vs         | 4545     |
| DECOUPLER   | dmf     | 12600       | th         | 68       |
| DECOUPLER   | ai      | cdc         | ph         |          |

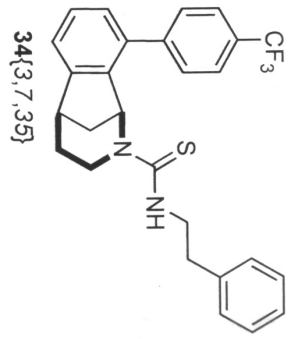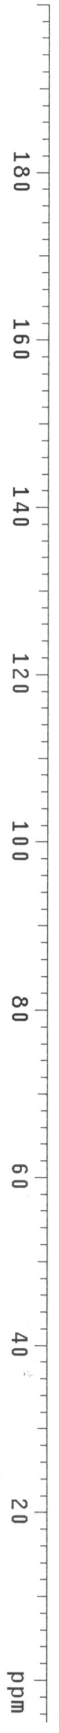

Data File L:\06-10\SAHN\300610-JJS-2-2211-04342.D  
Sample Name: jjs-2-221

=====  
Acq. Operator : sahn@mail.utexas.edu  
Acq. Instrument : LCMS  
Injection Date : 6/30/2010 6:22:42 PM  
Location : Vial 17  
Inj Volume : 1.0 µl  
Acq. Method : C:\CHEM32\1\METHODS\SP\_NIH.M  
Last changed : 6/30/2010 6:22:27 PM by sahn@mail.utexas.edu  
(modified after loading)  
Analysis Method : C:\CHEM32\1\METHODS\DEF\_LC.M  
Last changed : 11/20/2006 4:14:44 AM  
Sample Info : Easy-Access Method: 'SP\_NIH'

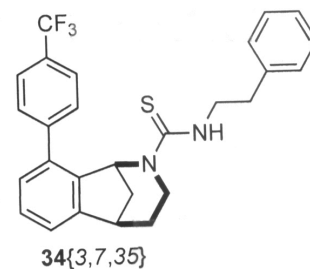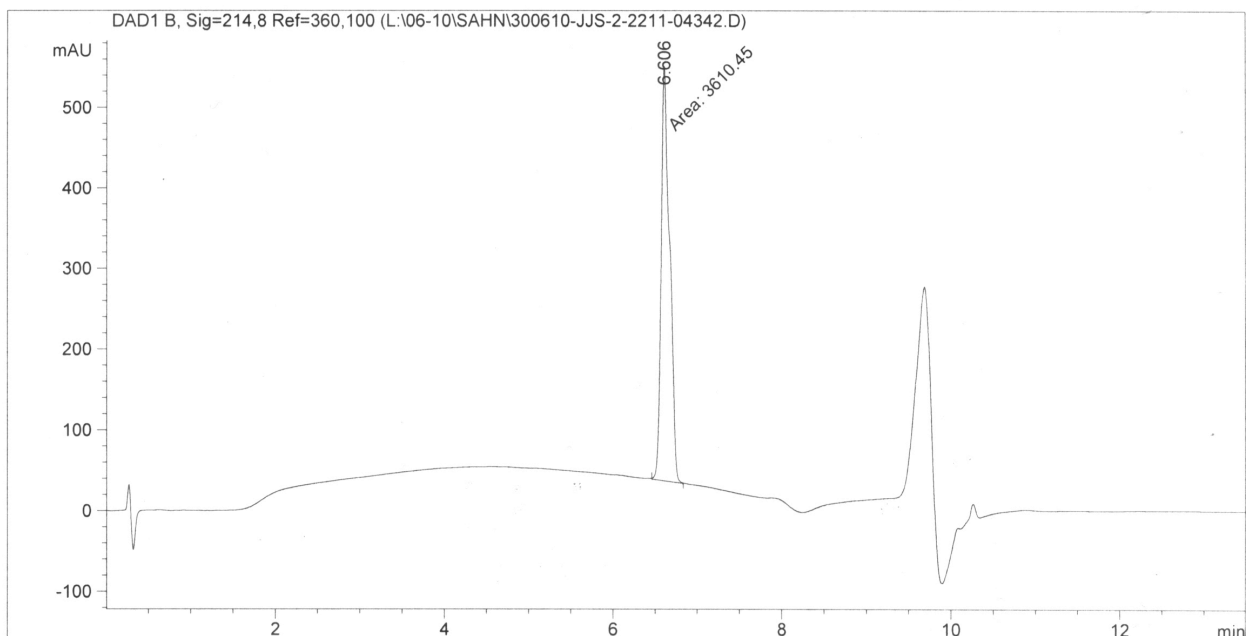

=====  
Area Percent Report  
=====

Sorted By : Signal  
Multiplier: : 1.0000  
Dilution: : 1.0000  
Use Multiplier & Dilution Factor with ISTDs

Signal 1: DAD1 B, Sig=214,8 Ref=360,100

| Peak # | RetTime [min] | Type | Width [min] | Area [mAU*s] | Height [mAU] | Area %   |
|--------|---------------|------|-------------|--------------|--------------|----------|
| 1      | 6.606         | MM   | 0.1164      | 3610.44775   | 517.13934    | 100.0000 |

Totals : 3610.44775 517.13934

STANDARD 1H OBSERVE

expt sta1h

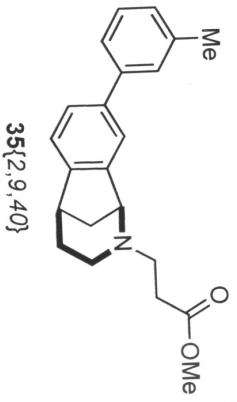

DEC. & VT 400.269

SAMPLE Sep 23 2009 dfrrq H1  
 CDC13 dn H1  
 solvent exp 30  
 file dpvr 0  
 dof 0  
 ACQUISITION 400.269 dm  
 srrq 400.269 dm  
 tn H1 dmm  
 at 2.856 H1 dmf  
 np 32000 lb  
 sw 5602.2 wtfile  
 fb not used ft  
 bs not used fn  
 tpvr 2.0  
 pw 2.000 werr  
 dl 2.000 wexp  
 tof 169.9 wbs  
 nt 70 wnt  
 ct 24  
 atlock n  
 gain not used  
 flags not used  
 i1 n  
 in n  
 dp y

DISPLAY -239.0  
 sp 4190.4  
 wp 477  
 vs 0  
 sc 0  
 wc 250  
 hzmm 16.76  
 is 301.56  
 rfi 614.1  
 rfp 0  
 th 20  
 ins 1.000  
 nm cdc ph

PROCESSING 0.10

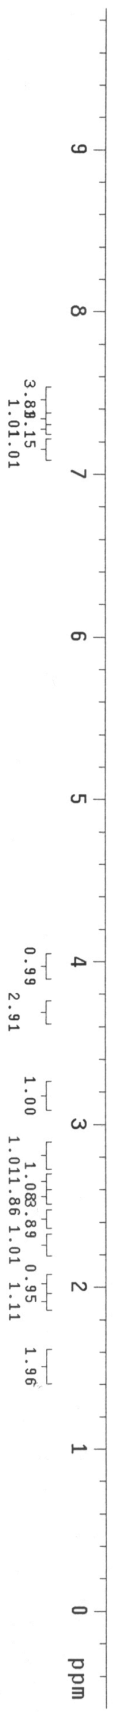

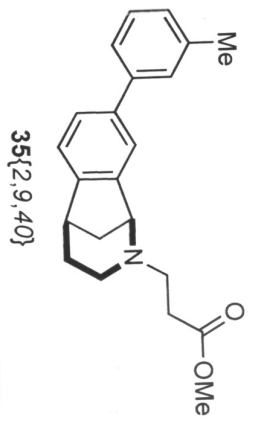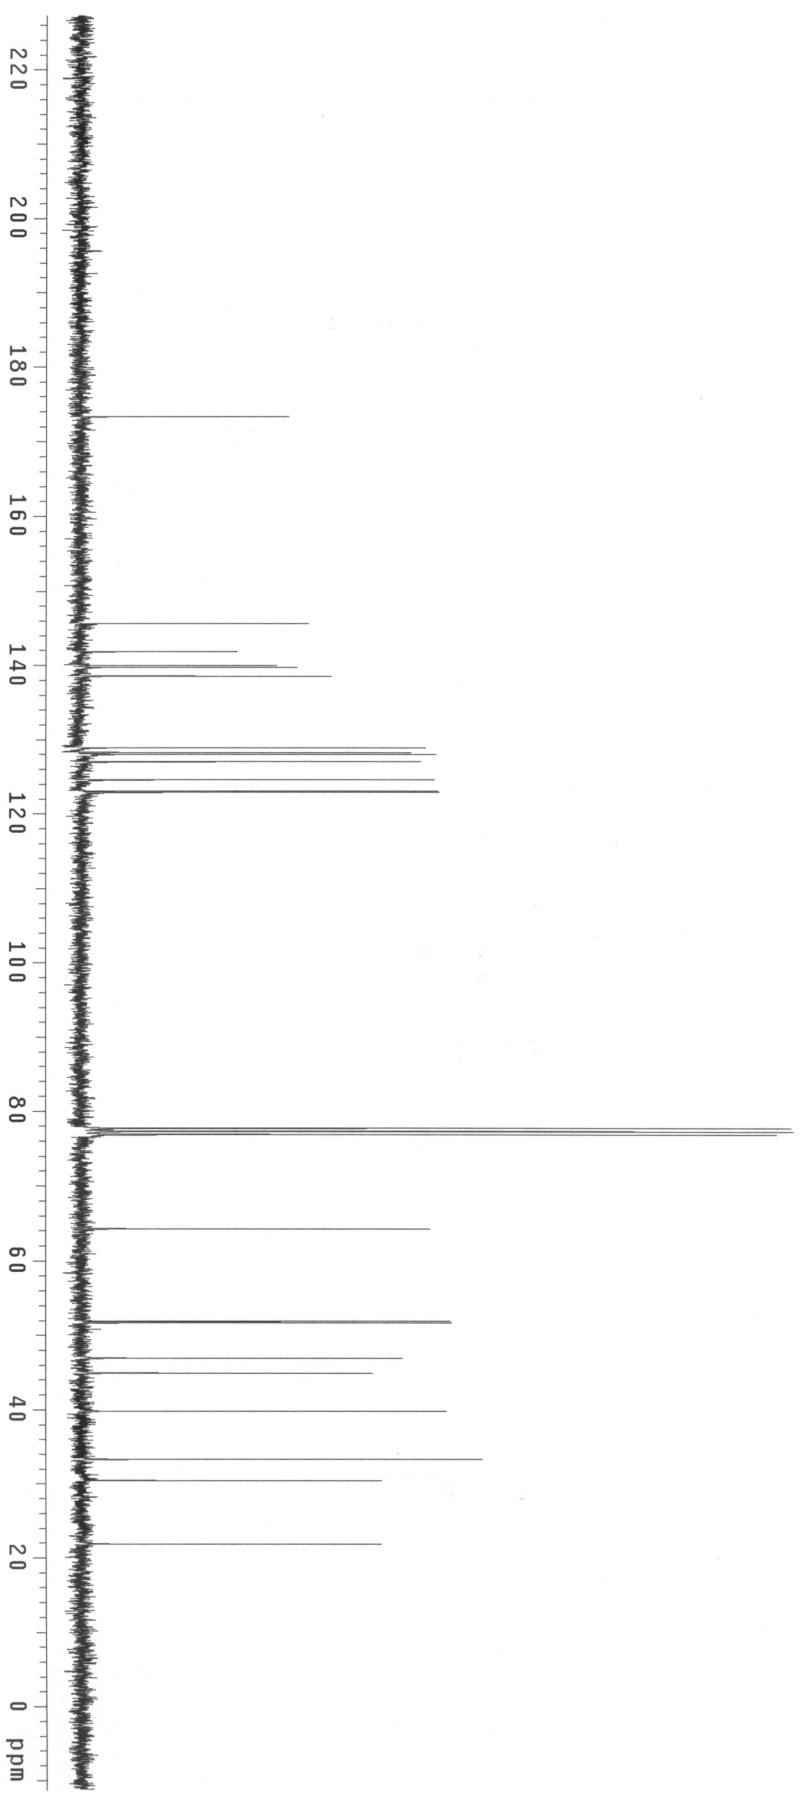



Data File L:\06-12\SAHN\140612-JJS-1-2301-19050.D  
Sample Name: jjjs-1-230

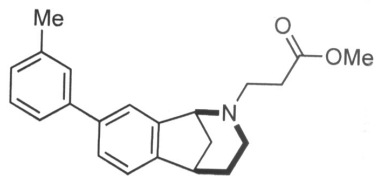

=====  
Acq. Operator : sahn@mail.utexas.edu  
Acq. Instrument : LCMS Location :  
Injection Date : 6/14/2012 10:44:01 AM Inj Volume :  
Acq. Method : C:\CHEM32\1\METHODS\SP NIH.M  
Last changed : 6/14/2012 10:43:46 AM by sahn@mail.utexas.  
(modified after loading)  
Analysis Method : C:\CHEM32\1\METHODS\DEEF\_LC.M  
Last changed : 9/28/2011 3:20:36 PM  
Sample Info : Easy-Access Method: 'SP NIH'

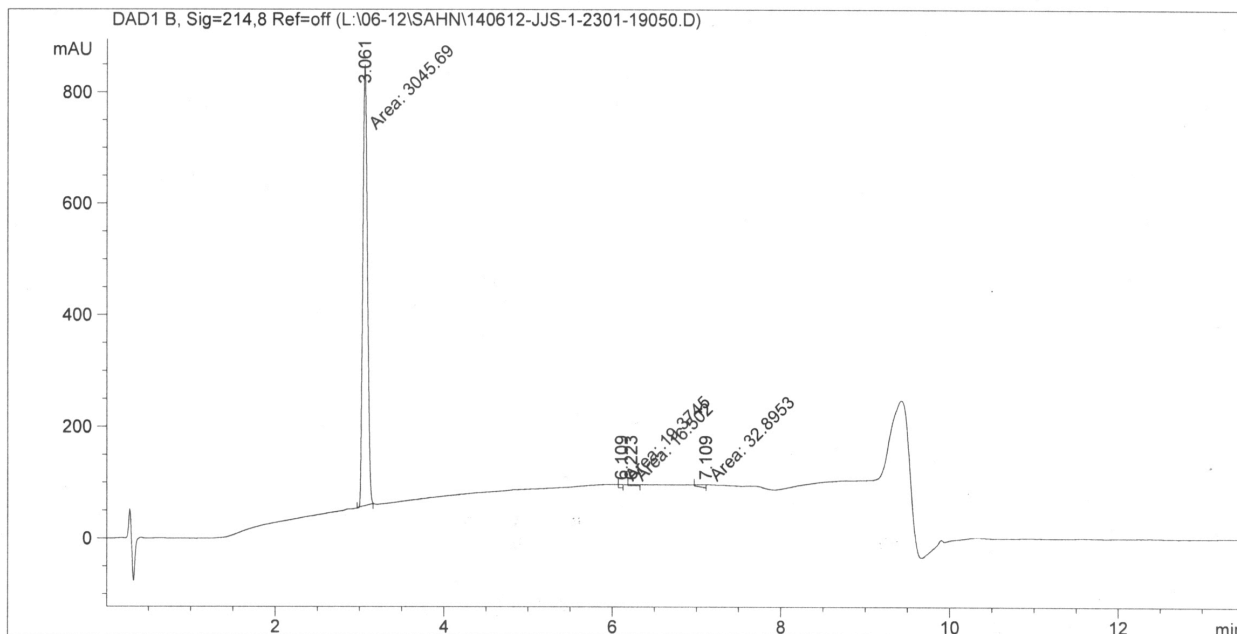

=====  
Area Percent Report  
=====

Sorted By : Signal  
Multiplier: : 1.0000  
Dilution: : 1.0000  
Use Multiplier & Dilution Factor with ISTDs

Signal 1: DAD1 B, Sig=214,8 Ref=off

| Peak # | RetTime [min] | Type | Width [min] | Area [mAU*s] | Height [mAU] | Area %  |
|--------|---------------|------|-------------|--------------|--------------|---------|
| 1      | 3.061         | MM   | 0.0639      | 3045.68555   | 794.70520    | 97.7919 |
| 2      | 6.109         | MM   | 0.0581      | 19.37449     | 5.55921      | 0.6221  |
| 3      | 6.223         | MM   | 0.1369      | 16.50199     | 2.00963      | 0.5299  |
| 4      | 7.109         | MM   | 0.1018      | 32.89531     | 5.38541      | 1.0562  |

Totals : 3114.45734 807.65945

STANDARD 1H OBSERVE

exp1 std1h  
 SAMPLE Nov 17 2010 DEC. & VT 400.269  
 date Nov 17 2010 dfreq H1  
 solvent CDCl3 dh H1  
 file ACQUISITION exp dpwr 30  
 sfile 400.269 dm mm  
 ln H1 dnm 200  
 at 2.856 dmf C  
 np 32000 PROCESSING 0.10  
 sw 5602.2 lb Wf11e ft  
 fb not used proc fn not used  
 bs 2 tpwr 58  
 pw 2.0  
 dl 2.000 weff  
 tof 169.9 wexp  
 nt 100 wbs  
 ct 80 wnt  
 alock n  
 gain not used  
 FLAGS n  
 i1 n  
 in n  
 dn Y  
 DISPLAY  
 sp -99.1  
 wp 4253.9  
 vs 555  
 sc 0  
 wc 250  
 hzmm 17.06  
 is 301.56  
 rf1 614.1  
 rfp 20  
 th 20  
 ins 1.000  
 nm cdc ph

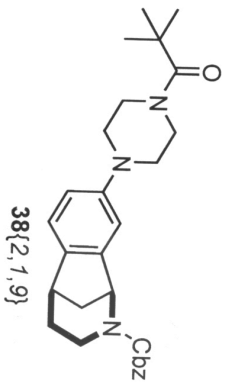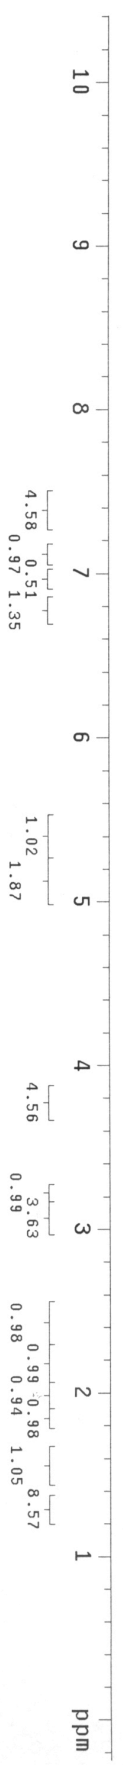

13C OBSERVE

expi std13c

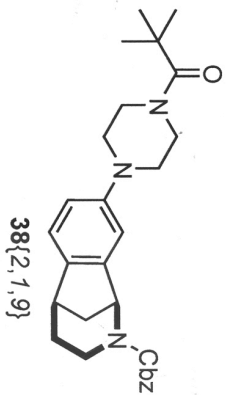

SAMPLE DEC. & VT  
date Nov 16 2010 dfrq 300.141  
solvent CDC13 dn H1  
file ACQUISITION exp dpwr 40  
sfrq 75.478 dm 400.0  
tn C13 dmm YYY W  
at 1.777 dmf 8000  
np 64000 dseq  
sw 18009.9 dres 1.0  
fb 10000 homo n  
bs 8 PROCESSING 1.00  
tpwr 50 lb wtfile  
pw 6.0 proc ft  
dl 2.000 fn not used  
tof 586.5 math f  
nt 3000  
ct 2298  
atlock n weff  
gain n wexp  
flags 60 wds  
l1 n wnt  
l1 n  
in n  
dp n  
hs mn  
DISPLAY  
SP -263.1  
WP 16874.9  
VS 148  
SC 0  
WC 250  
h2mm 67.50  
is 500.00  
f1 853.9  
f1p 11  
th 11  
rms 100.000  
no ph

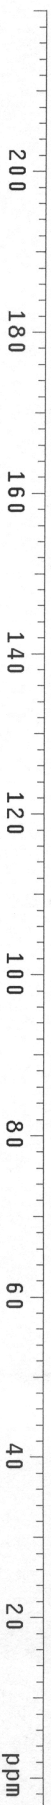

Data File L:\05-10\SAHN\260510-PIV PIPERAZINE1-03658.  
Sample Name: piv piperazine

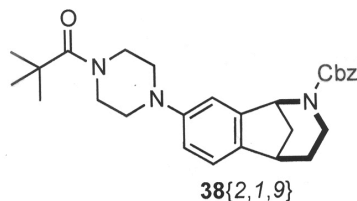

=====  
Acq. Operator : sahn@mail.utexas.edu  
Acq. Instrument : LCMS  
Injection Date : 5/26/2010 11:59:35 PM  
  
Acq. Method : C:\CHEM32\1\METHODS\SP NIH.M  
Last changed : 5/26/2010 11:59:20 PM by sahn@mail.utexas.edu  
(modified after loading)  
Analysis Method : C:\CHEM32\1\METHODS\DEF\_LC.M  
Last changed : 11/20/2006 4:14:44 AM  
Sample Info : Easy-Access Method: 'SP NIH'

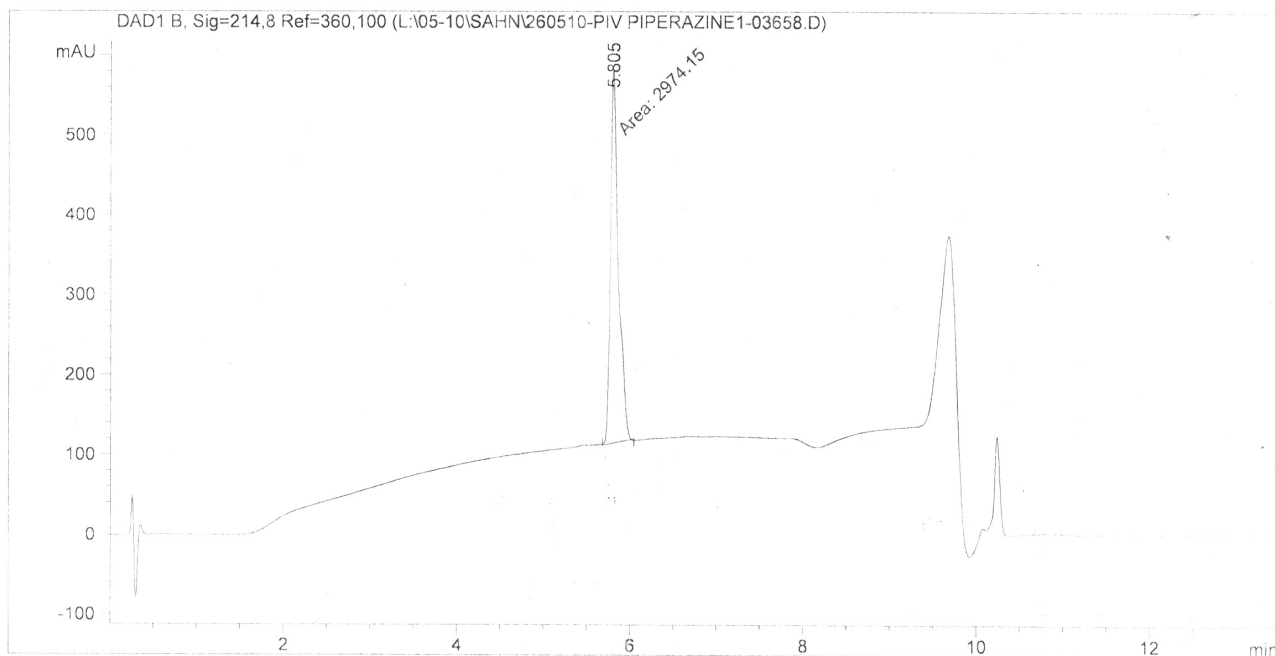

=====  
Area Percent Report  
=====

Sorted By : Signal  
Multiplier: : 1.0000  
Dilution: : 1.0000  
Use Multiplier & Dilution Factor with ISTDs

Signal\*1: DAD1 B, Sig=214,8 Ref=360,100

| Peak # | RetTime [min] | Type | Width [min] | Area [mAU*s] | Height [mAU] | Area %   |
|--------|---------------|------|-------------|--------------|--------------|----------|
| 1      | 5.805         | MM   | 0.1055      | 2974.14893   | 469.95639    | 100.0000 |

Totals : 2974.14893 469.95639

References:

---

- i Pangborn, A. B.; Giardello, M. A.; Grubbs, R. H.; Rosen, R. K.; Timmers, F. J. "Safe and Convenient Procedure for Solvent Purification" *Organometallics* **1996**, *15*, 1518-1520.
- ii. Still, W. C.; Kahn, M.; Mitra, A. "Rapid Chromatographic Technique for Preparative Separations with Moderate Resolution" *J. Org. Chem.* **1978**, *43*, 2923-2925.
- iii For a representative procedure for Cbz removal of an anilino-norbenzomorphan, see text, reference 10.
